# Supplementary material
Source: publisher figshare collection journal article supplement (https://acs.figshare.com/ndownloader/files/5964966)

(69 pages)

**Supporting Information For**

**Regioselective Synthesis of 2,3,4-Trisubstituted Pyrroles via**

**Pd(II)-Catalyzed Three-Component Cascade Reactions of**

**Amines, Alkyne Esters and Alkenes**

Xu Zhang,<sup>\*,†</sup> Xuefeng Xu,<sup>†</sup> Gong Chen,<sup>§</sup> and Wei Yi<sup>\*,‡</sup>

<sup>†</sup> College of Chemistry and Pharmaceutical Engineering, Nanyang Normal University, Nanyang 473061, China

<sup>‡</sup> VARI/SIMM Center, Center for Structure and Function of Drug Targets, CAS-Key Laboratory of Receptor Research, Shanghai Institute of Materia Medica, Chinese Academy of Sciences, Shanghai 201203, China

<sup>§</sup> China Gateway Pharmaceutical Development Co., Ltd, Shanghai 201417, China

\* e-mail: yiwei.simm@simmm.ac.cn

\* e-mail: zhangxuedu@126.com

**Table of contents**

|                                                                            |       |
|----------------------------------------------------------------------------|-------|
| General methods and materials .....                                        | 2     |
| Optimization of reaction conditions .....                                  | 3-4   |
| General catalytic procedure for the synthesis of pyrroles .....            | 5     |
| The experimental procedure for radical capture experiment with TEMPO ..... | 6     |
| The experimental investigation for the reaction mechanism .....            | 7     |
| Characterization data for the products .....                               | 8-24  |
| Copies of <sup>1</sup> H and <sup>13</sup> C NMR spectra of products ..... | 25-69 |

## General Methods and Materials

$\text{Pd}(\text{OAc})_2$ ,  $\text{K}_2\text{S}_2\text{O}_8$  were purchased from Energy Chemical and used without further purification. Other chemicals were purchased from commercial suppliers, further dried and purified if necessary. The water used was re-distilled and ion-free.  $^1\text{H}$  and  $^{13}\text{C}$  NMR spectra were achieved on a Bruker AVANCE 400 MHz spectrometer ( $^1\text{H}$  400 MHz;  $^{13}\text{C}$  100 MHz) in  $\text{CDCl}_3$  or  $\text{DMSO}-d_6$ . Abbreviations for data quoted are s-singlet; brs-broad singlet; d-doublet; t-triplet; dd-doublet of doublets; m-multiplet. High-resolution mass spectra were measured on a Waters Micromass GCT facility. Thin-layer chromatographies were done on pre-coated silica gel 60F254 plates (Merck). Silica gel 60H (200-300 mesh) manufactured by Qingdao Haiyang Chemical Group Co. (China) was used for general chromatography.

## Optimization of reaction conditions

Table S1<sup>a</sup>

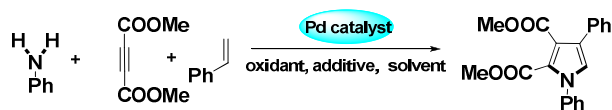

| entry           | catalyst                                              | oxidant                                      | additive | solvent | yield <sup>b</sup> (%) |
|-----------------|-------------------------------------------------------|----------------------------------------------|----------|---------|------------------------|
| 1               | Pd(OAc) <sub>2</sub>                                  | K <sub>2</sub> S <sub>2</sub> O <sub>8</sub> | HOAc     | Toluene | 25                     |
| 2               | Pd(OAc) <sub>2</sub>                                  | K <sub>2</sub> S <sub>2</sub> O <sub>8</sub> | HOAc     | DMF     | 0                      |
| 3               | Pd(OAc) <sub>2</sub>                                  | K <sub>2</sub> S <sub>2</sub> O <sub>8</sub> | HOAc     | DMSO    | 0                      |
| 4               | Pd(OAc) <sub>2</sub>                                  | K <sub>2</sub> S <sub>2</sub> O <sub>8</sub> | HOAc     | MeOH    | 0                      |
| 5               | Pd(OAc) <sub>2</sub>                                  | K <sub>2</sub> S <sub>2</sub> O <sub>8</sub> | HOAc     | THF     | <5                     |
| 5               | Pd(OAc) <sub>2</sub>                                  | K <sub>2</sub> S <sub>2</sub> O <sub>8</sub> | HOAc     | Dioxane | 0                      |
| 6               | Pd(OAc) <sub>2</sub>                                  | K <sub>2</sub> S <sub>2</sub> O <sub>8</sub> | HOAc     | MeCN    | 73                     |
| 7               | Pd(OAc) <sub>2</sub>                                  | K <sub>2</sub> S <sub>2</sub> O <sub>8</sub> | TsOH     | MeCN    | 0                      |
| 8               | Pd(OAc) <sub>2</sub>                                  | K <sub>2</sub> S <sub>2</sub> O <sub>8</sub> | TFA      | MeCN    | 15                     |
| 9               | Pd(OAc) <sub>2</sub>                                  | K <sub>2</sub> S <sub>2</sub> O <sub>8</sub> | TfOH     | MeCN    | <5                     |
| 10              | Pd(OAc) <sub>2</sub>                                  | BQ                                           | HOAc     | MeCN    | 0                      |
| 11              | Pd(OAc) <sub>2</sub>                                  | Cu(OAc) <sub>2</sub>                         | HOAc     | MeCN    | 0                      |
| 12              | Pd(OAc) <sub>2</sub>                                  | Ag <sub>2</sub> CO <sub>3</sub>              | HOAc     | MeCN    | 0                      |
| 13              | Pd(TFA) <sub>2</sub>                                  | K <sub>2</sub> S <sub>2</sub> O <sub>8</sub> | HOAc     | MeCN    | 0                      |
| 14              | Pd(PPh <sub>3</sub> ) <sub>2</sub><br>Cl <sub>2</sub> | K <sub>2</sub> S <sub>2</sub> O <sub>8</sub> | HOAc     | MeCN    | 0                      |
| 15 <sup>c</sup> | Pd(OAc) <sub>2</sub>                                  | K <sub>2</sub> S <sub>2</sub> O <sub>8</sub> | HOAc     | MeCN    | 89                     |
| 16              | -----                                                 | K <sub>2</sub> S <sub>2</sub> O <sub>8</sub> | HOAc     | MeCN    | 0                      |
| 17              | Pd(OAc) <sub>2</sub>                                  | -----                                        | HOAc     | MeCN    | 0                      |
| 18              | Pd(OAc) <sub>2</sub>                                  | K <sub>2</sub> S <sub>2</sub> O <sub>8</sub> | -----    | MeCN    | 0                      |
| 19 <sup>d</sup> | Pd(OAc) <sub>2</sub>                                  | K <sub>2</sub> S <sub>2</sub> O <sub>8</sub> | HOAc     | MeCN    | 83                     |

<sup>a</sup>Unless otherwise noted, reactions were carried out with **1a** (1.0 mmol), **2a** (1.0 mmol), **3a** (2.0 mmol), catalyst (5 mol %), oxidant (2.0 mmol), additive (2.0 mL) in 2.0 mL of solvent at 80 °C for 20 h. <sup>b</sup>All yields were isolated yields. <sup>c</sup>Reaction was carried out at 100 °C. <sup>d</sup>10 mmol scale.

At the outset of this study, we chose Pd(OAc)<sub>2</sub> as the active Pd(II) catalyst and employed commercially available aniline (**1a**), dimethyl but-2-ynedioate (**2a**) and styrene (**3a**) as the model substrates for the reaction development of the three-component cascade reaction (Table 1). To our delight, the anticipated pyrrole **4a** was generated in 25% yield with excellent regio-/site-selectivity under the initial conditions (Table 1, entry 1), and its structure was confirmed by <sup>1</sup>H and <sup>13</sup>C NMR analysis and mass spectrometry. A survey of solvents revealed that MeCN was optimal (entries 1–6), affording pyrrole **3a** in 73% yield. The brief screening indicated HOAc and K<sub>2</sub>S<sub>2</sub>O<sub>8</sub> to be the best choice of additives and oxidants, respectively (entries 6–12). Changing the catalyst Pd(OAc)<sub>2</sub> to other two well known catalysts Pd(TFA)<sub>2</sub> and Pd(PPh<sub>3</sub>)<sub>2</sub>Cl<sub>2</sub> obviously inhibited the process (entries 13–14). Gratifyingly, an improved yield of product **4a** was obtained when the temperature was increased to 100 °C (entry 15). The control experiments indicated that no desired product was detected in the absence of the catalyst, the additive or the oxidant (entries 16–18). In summary, the optimal conditions for the three-component cascade reaction were identified as the following: 5 mol % Pd(OAc)<sub>2</sub>, 2.0 equiv of K<sub>2</sub>S<sub>2</sub>O<sub>8</sub>, and 2.0 mL of HOAc in MeCN at 100 °C for 20 h under an atmosphere of air. Finally, we were pleased to find that the reaction could be smoothly performed on a 10 mmol scale under the optimized conditions without a significant decrease in the product yield (83%, entry 19), which illustrated the remarkable robustness of this Pd(II)-catalyzed system.

### General catalytic procedure for the synthesis of pyrroles

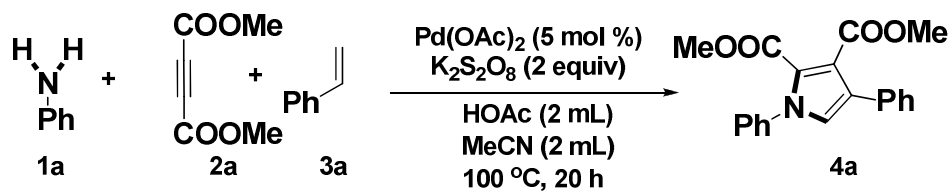

A reaction kettle (30 mL) was charged with aniline (**1a**, 1.0 mmol), and dimethyl acetylenedicarboxylate (**2a**, 1.0 mmol). The mixture was stirred at room temperature for 10 minutes, then styrene (**3a**, 2.0 mmol, 2.0 eq), potassium persulfate (2.0 eq, 0.54g), palladium acetate (11.2 mg), acetonitrile (2 mL), and acetic acid (2 mL) were added into the mixture, which was stirred at  $100\text{ }^\circ\text{C}$  for 20 hours. The obtained mixture was quenched by sat. aq.  $\text{NaHCO}_3$ , and diluted with 20 mL of dichloromethane and washed with 10 mL of  $\text{H}_2\text{O}$ . The aqueous layer was extracted twice with dichloromethane (10 mL) and the combined organic phase was dried over  $\text{Na}_2\text{SO}_4$ . After evaporation of the solvents, the residue was purified by silica gel chromatography (hexane/ $\text{AcOEt}$  = 10 : 1) to afford pyrrole product **4a** in 89% yield. All other products are synthesized in a similar manner, with the yields listed in the main text calculated from the isolated, pure products.

### The experimental procedure for radical capture experiment with TEMPO

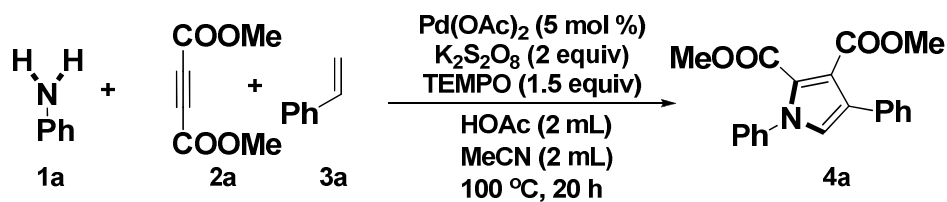

A reaction kettle (30 mL) was charged with aniline (**1a**, 1.0 mmol), and dimethyl acetylenedicarboxylate (**2a**, 1.0 mmol). The mixture was stirred at room temperature for 10 minutes, then styrene (**3a**, 2.0 mmol, 2.0 eq), potassium persulfate (2.0 eq, 0.54g), palladium acetate (11.2 mg), acetonitrile (2 mL), TEMPO (234 mg, 1.5 mmol), and acetic acid (2 mL) was added in the mixture. The obtained mixture was stirred at 100 °C for 20 hours, and **4a** was not detected.

### The experimental investigation for the Reaction Mechanism

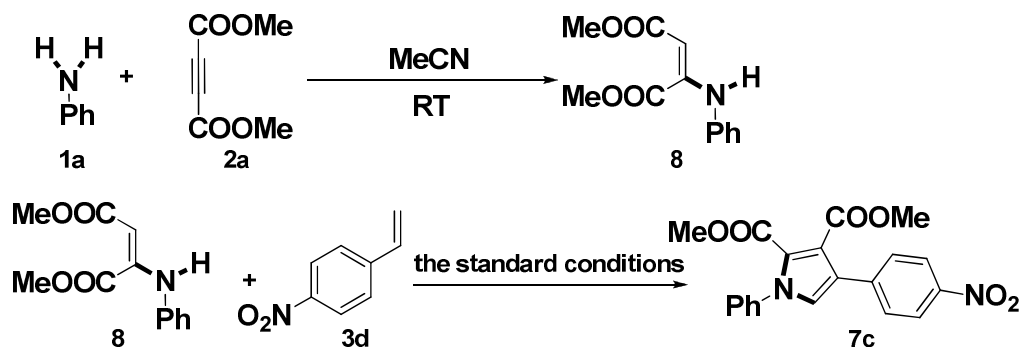

A reaction kettle (30 mL) was charged with aniline (**1a**, 1.0 mmol), and dimethyl acetylenedicarboxylate (**2a**, 1.0 mmol) in acetonitrile (2 mL). The mixture was stirred at room temperature for 10 minutes, then evaporated in vacuo. The obtained residue was purified by flash column chromatography using a mixture of PE and EA as eluent to afford the enamine **8** in 76% yield:  $^1\text{H NMR}$  (400 MHz,  $\text{CDCl}_3$ )  $\delta$  ppm: 9.66 (s, 1H), 7.26 - 7.30 (m, 2H), 7.07 - 7.11 (t, 1H), 6.90 (d,  $J = 8.0$  Hz, 2H), 3.74 (s, 3H), 3.69 (s, 3H);  $^{13}\text{C NMR}$  (100 MHz,  $\text{CDCl}_3$ )  $\delta$  ppm: 169.9, 164.9, 148.0, 140.3, 129.2, 124.2, 120.7, 93.6, 52.7, 51.2; **HRMS (ESI-TOF)**  $m/z$  calcd for  $\text{C}_{12}\text{H}_{14}\text{NO}_4$   $[\text{M} + \text{H}]^+$  236.0917, found 236.0920.

A reaction kettle (30 mL) was charged with the enamine (**8**, 1.0 mmol), 4-nitrostyrene (**3d**, 2.0 mmol, 2.0 eq), potassium persulfate (2.0 eq, 0.54g), palladium acetate (11.2 mg), acetonitrile (2 mL), and acetic acid (2 mL) in the mixture. The mixture was stirred at 100 °C for 20 hours. The obtained mixture was quenched by sat. aq.  $\text{NaHCO}_3$ , and diluted with 20 mL of dichloromethane and washed with 10 mL of  $\text{H}_2\text{O}$ . The aqueous layer was extracted twice with dichloromethane (10 mL) and the combined organic phase was dried over  $\text{Na}_2\text{SO}_4$ . After evaporation of the solvents, the residue was purified by silica gel chromatography (hexane/AcOEt = 10 : 1) to afford pyrrole product **7c** in 65% yield.

## Characterization data for products

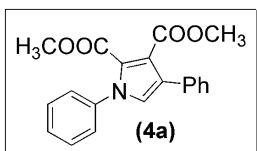

### 1,4-Diphenyl-1H-pyrrole-2,3-dicarboxylic acid dimethyl

**ester (4a):** Obtained as a colorless oil (298.2 mg, 89% yield);  $^1\text{H NMR}$  (400 MHz,  $\text{CDCl}_3$ )  $\delta$  ppm: 7.44 - 7.46 (m, 5H), 7.33 - 7.38 (m, 4H), 7.26 - 7.30 (t, 1H), 3.85 (s, 3H), 3.70 (s, 3H);  $^{13}\text{C NMR}$  (100 MHz,  $\text{CDCl}_3$ )  $\delta$  ppm: 166.7, 160.4, 139.5, 133.1, 129.0, 128.63, 128.56, 127.7, 127.2, 126.14, 125.97, 124.9, 123.2, 121.8, 52.4, 52.0; **HRMS (ESI-TOF)**  $m/z$  calcd for  $\text{C}_{20}\text{H}_{18}\text{NO}_4$   $[\text{M} + \text{H}]^+$  336.1230, found 336.1249.

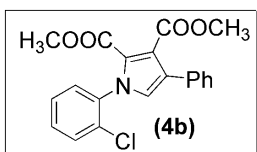

### 1-(2-Chloro-phenyl)-4-phenyl-1H-pyrrole-2,3-dicarboxylic

**acid dimethyl ester (4b):** Obtained as a yellow oil (276.8 mg, 75% yield);  $^1\text{H NMR}$  (400 MHz,  $\text{CDCl}_3$ )  $\delta$  ppm: 7.51 - 7.53 (m, 1H), 7.44 - 7.46 (m, 2H), 7.35 - 7.43 (m, 5H), 7.27 - 7.31 (m, 1H), 6.95 (s, 1H), 3.87 (s, 3H), 3.70 (s, 3H);  $^{13}\text{C NMR}$  (100 MHz,  $\text{CDCl}_3$ )  $\delta$  ppm: 167.0, 159.8, 137.5, 133.0, 132.1, 130.1, 130.0, 128.9, 128.7, 127.5, 127.4, 127.2, 125.8, 124.9, 122.8, 122.3, 52.6, 51.9; **HRMS (ESI-TOF)**  $m/z$  calcd for  $\text{C}_{20}\text{H}_{17}\text{NClO}_4$   $[\text{M} + \text{H}]^+$  370.0841, found 370.0849.

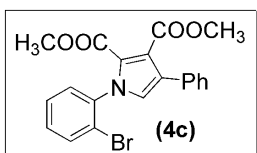

### 1-(2-Bromo-phenyl)-4-phenyl-1H-pyrrole-2,3-dicarboxylic

**acid dimethyl ester (4c):** Obtained as a yellow oil (289.1 mg, 70% yield);  $^1\text{H NMR}$  (400 MHz,  $\text{CDCl}_3$ )  $\delta$  ppm: 7.68 - 7.71 (m, 1H), 7.43 - 7.47 (m, 2H), 7.41 - 7.43 (m, 1H), 7.27 - 7.39 (m, 5H), 6.95 (s, 1H), 3.87 (s, 3H), 3.69 (s, 3H);  $^{13}\text{C NMR}$  (100 MHz,  $\text{CDCl}_3$ )  $\delta$  ppm: 167.0, 159.8, 139.2, 133.1, 133.0, 130.4, 129.0, 128.7, 128.0, 127.5,



127.2, 125.7, 124.9, 122.7, 122.2, 122.1, 52.6, 52.0; **HRMS (ESI-TOF)** m/z calcd for  $C_{20}H_{17}NBrO_4$   $[M + H]^+$  414.0335, found 414.0344.

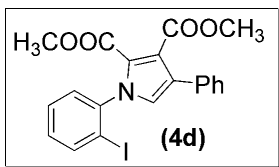

**1-(2-Iodo-phenyl)-4-phenyl-1H-pyrrole-2,3-dicarboxylic**

**acid dimethyl ester (4d):** Obtained as a yellow oil (308.9 mg, 67% yield);  $^1H$  NMR (400 MHz,  $CDCl_3$ )  $\delta$  ppm: 7.92 - 7.94 (m, 1H), 7.44 - 7.48 (m, 3H), 7.36 - 7.40 (m, 3H), 7.28 - 7.32 (m, 1H), 6.93 (s, 1H), 3.88 (s, 3H), 3.69 (s, 3H);  $^{13}C$  NMR (100 MHz,  $CDCl_3$ )  $\delta$  ppm: 167.0, 159.7, 142.8, 139.3, 133.0, 130.4, 128.9, 128.7, 128.3, 127.5, 127.2, 125.6, 125.0, 122.4, 122.3, 97.5, 52.6, 52.0; **HRMS (ESI-TOF)** m/z calcd for  $C_{20}H_{17}NIO_4$   $[M + H]^+$  462.0197, found 462.0207.

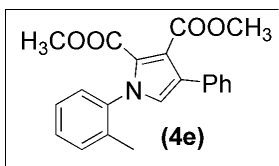

**4-Phenyl-1-o-tolyl-1H-pyrrole-2,3-dicarboxylic acid**

**dimethyl ester (4e):** Obtained as a pale yellow oil (289.6 mg, 83% yield);  $^1H$  NMR (400 MHz,  $CDCl_3$ )  $\delta$  ppm: 7.43 - 7.46 (m, 2H), 7.35 - 7.39 (m, 3H), 7.26 - 7.32 (m, 3H), 7.21 - 7.24 (m, 1H), 6.92 (s, 1H), 3.87 (s, 3H), 3.67 (s, 3H), 2.11 (s, 3H);  $^{13}C$  NMR (100 MHz,  $CDCl_3$ )  $\delta$  ppm: 167.1, 150.0, 139.0, 135.4, 133.2, 130.6, 129.1, 128.7, 127.5, 127.3, 127.2, 126.5, 125.8, 124.7, 123.0, 121.6, 52.5, 51.9, 17.4; **HRMS (ESI-TOF)** m/z calcd for  $C_{21}H_{20}NO_4$   $[M + H]^+$  350.1387, found 350.1386.

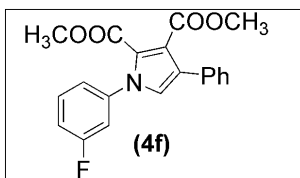

**1-(3-Fluoro-phenyl)-4-phenyl-1H-pyrrole-2,3-dicarboxylic**

**c acid dimethyl ester (4f):** Obtained as a pale orange viscous oil (268.3 mg, 76% yield);  $^1H$  NMR (400 MHz,  $CDCl_3$ )  $\delta$  ppm: 7.92 - 7.94 (m, 1H), 7.44 - 7.48 (m, 3H), 7.36 - 7.40 (m, 3H), 7.28 - 7.32 (m, 1H), 6.93 (s, 1H), 3.88 (s, 3H), 3.69 (s, 3H);  $^{13}C$

**NMR** (100 MHz, CDCl<sub>3</sub>)  $\delta$  ppm: 166.6, 150.2, 140.6, 132.9, 130.2, 130.1, 128.7, 127.7, 127.3, 125.8, 125.2, 123.0, 122.3, 122.0, 115.6, 114.0, 52.5, 52.1; **HRMS (ESI-TOF)** m/z calcd for C<sub>20</sub>H<sub>17</sub>FNO<sub>4</sub> [M + H]<sup>+</sup> 354.1136, found 354.1173.

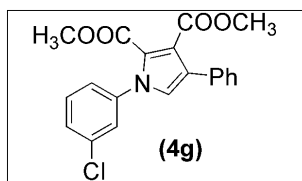

**1-(3-Chloro-phenyl)-4-phenyl-1H-pyrrole-2,3-dicarboxylic acid dimethyl ester (4g):** Obtained as a orange viscous oil (284.1 mg, 77% yield); <sup>1</sup>H NMR (400 MHz, CDCl<sub>3</sub>)  $\delta$  ppm: 7.41 - 7.45 (m, 4H), 7.36 - 7.40 (m, 4H), 7.28 - 7.33 (m, 1H), 7.00 (s, 1H), 3.86 (s, 3H), 3.74 (s, 3H); <sup>13</sup>C NMR (100 MHz, CDCl<sub>3</sub>)  $\delta$  ppm: 166.6, 160.1, 140.1, 134.5, 132.8, 129.9, 128.8, 128.7, 127.6, 127.3, 126.5, 125.9, 125.2, 124.6, 122.9, 122.4, 52.5, 52.0; **HRMS (ESI-TOF)** m/z calcd for C<sub>20</sub>H<sub>17</sub>ClNO<sub>4</sub> [M + H]<sup>+</sup> 370.0841, found 370.0461.

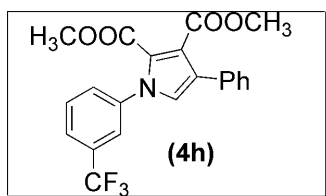

**4-Phenyl-1-(3-trifluoromethyl-phenyl)-1H-pyrrole-2,3-dicarboxylic acid dimethyl ester (4h):** Obtained as a yellow viscous oil (290.2 mg, 72% yield); <sup>1</sup>H NMR (400 MHz, CDCl<sub>3</sub>)  $\delta$  ppm: 7.72 (d, *J* = 7.6Hz, 1H), 7.56 - 7.64 (m, 3H), 7.44 - 7.46 (m, 2H), 7.37 - 7.40 (m, 2H), 7.30 - 7.34 (m, 1H), 7.03 (s, 1H), 3.88 (s, 3H), 3.69 (s, 3H); <sup>13</sup>C NMR (100 MHz, CDCl<sub>3</sub>)  $\delta$  ppm: 166.6, 160.1, 139.9, 132.7, 131.7, 131.4, 129.8, 129.6, 128.7, 127.6, 127.4, 125.9, 125.4, 123.4, 122.9, 122.8, 52.5, 52.0; **HRMS (ESI-TOF)** m/z calcd for C<sub>21</sub>H<sub>17</sub>F<sub>3</sub>NO<sub>4</sub> [M + H]<sup>+</sup> 404.1104, found 404.0739.

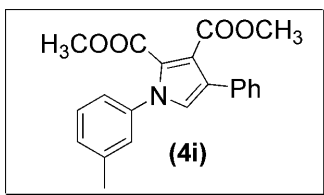

**4-Phenyl-1-m-tolyl-1H-pyrrole-2,3-dicarboxylic acid**

**dimethyl ester (4i):** Obtained as a pale yellow viscous oil (286.2 mg, 82% yield);  $^1\text{H}$  NMR (400 MHz,  $\text{CDCl}_3$ )  $\delta$  ppm: 7.43 - 7.46 (m, 2H), 7.30 - 7.39 (m, 4H), 7.14 - 7.19 (m, 3H), 6.99 (s, 1H), 3.84 (s, 3H), 3.72 (s, 3H), 2.41 (s, 3H);  $^{13}\text{C}$  NMR (100 MHz,  $\text{CDCl}_3$ )  $\delta$  ppm: 166.8, 160.5, 139.4, 139.0, 133.2, 129.3, 128.71, 128.69, 128.59, 128.17, 127.7, 127.1, 126.6, 125.9, 123.2, 110.5, 52.4, 52.0, 21.3; **HRMS (ESI-TOF)**  $m/z$  calcd for  $\text{C}_{21}\text{H}_{20}\text{NO}_4$   $[\text{M} + \text{H}]^+$  350.1387, found 350.1376.

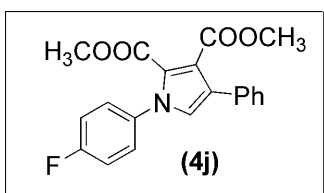

**1-(4-Fluoro-phenyl)-4-phenyl-1H-pyrrole-2,3-dicarboxy**

**lic acid dimethyl ester (4j):** Obtained as a yellow viscous oil (275.3 mg, 78% yield);  $^1\text{H}$  NMR (400 MHz,  $\text{CDCl}_3$ )  $\delta$  ppm: 7.42 - 7.45 (m, 2H), 7.30 - 7.39 (m, 5H), 7.11 - 7.17 (m, 2H), 6.98 (s, 1H), 3.85 (s, 3H), 3.72 (s, 3H);  $^{13}\text{C}$  NMR (100 MHz,  $\text{CDCl}_3$ )  $\delta$  ppm: 166.7, 160.2, 135.5, 133.0, 128.7, 128.1, 128.0, 127.6, 127.3, 126.2, 124.9, 123.0, 122.2, 115.8, 52.5, 52.0; **HRMS (ESI-TOF)**  $m/z$  calcd for  $\text{C}_{20}\text{H}_{17}\text{FNO}_4$   $[\text{M} + \text{H}]^+$  354.1136, found 354.1178.

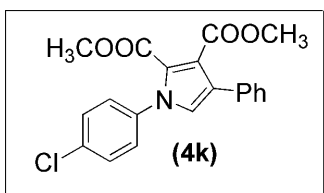

**1-(4-Chloro-phenyl)-4-phenyl-1H-pyrrole-2,3-dicarbox**

**ylic acid dimethyl ester (4k):** Obtained as a yellow viscous oil (287.8 mg, 78% yield);  $^1\text{H}$  NMR (400 MHz,  $\text{CDCl}_3$ )  $\delta$  ppm: 7.42 - 7.45 (m, 4H), 7.36 - 7.41 (m, 2H), 7.27 - 7.32 (m, 3H), 6.98 (s, 1H), 3.86 (s, 3H), 3.73 (s, 3H);  $^{13}\text{C}$  NMR (100 MHz,  $\text{CDCl}_3$ )  $\delta$  ppm: 166.7, 160.2, 137.9, 134.5, 132.9, 129.2, 128.7, 127.60, 127.55, 127.3,

126.0, 124.4, 122.4, 110.0, 52.5, 52.0; **HRMS (ESI-TOF)**  $m/z$  calcd for  $C_{20}H_{17}ClNO_4$   $[M + H]^+$  370.0841, found 370.0838.

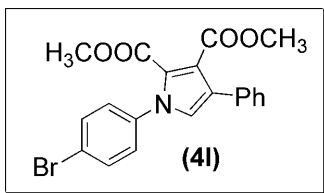

**1-(4-Bromo-phenyl)-4-phenyl-1H-pyrrole-2,3-dicarboxylic acid dimethyl ester (4l):**

Obtained as a yellow viscous oil (313.9 mg, 76% yield);  **$^1H$  NMR** (400 MHz,  $CDCl_3$ )  $\delta$  ppm: 7.57 - 7.61 (m, 2H), 7.36 - 7.44 (m, 4H), 7.29 - 7.33 (m, 1H), 7.22 - 7.26 (m, 2H), 6.98 (s, 1H), 3.86 (s, 3H), 3.72 (s, 3H);  **$^{13}C$  NMR** (100 MHz,  $CDCl_3$ )  $\delta$  ppm: 166.6, 160.2, 138.4, 132.8, 132.1, 128.7, 127.9, 127.6, 127.3, 125.9, 125.1, 124.8, 122.5, 122.4, 52.5, 52.1; **HRMS (ESI-TOF)**  $m/z$  calcd for  $C_{20}H_{17}BrNO_4$   $[M + H]^+$  414.0335, found 414.0313.

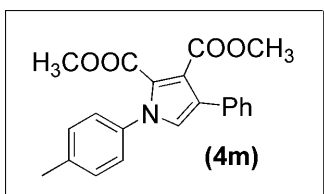

**4-Phenyl-1-p-tolyl-1H-pyrrole-2,3-dicarboxylic acid dimethyl ester (4m):**

Obtained as a yellow viscous oil (328.1 mg, 94% yield);  **$^1H$  NMR** (400 MHz,  $CDCl_3$ )  $\delta$  ppm: 7.43 - 7.45 (m, 2H), 7.35 - 7.39 (m, 2H), 7.29 - 7.31 (m, 1H), 7.22 - 7.27 (m, 4H), 6.98 (s, 1H), 3.84 (s, 3H), 3.72 (s, 3H), 2.41 (s, 3H);  **$^{13}C$  NMR** (100 MHz,  $CDCl_3$ )  $\delta$  ppm: 166.8, 160.5, 138.5, 136.9, 133.2, 129.6, 128.6, 127.7, 127.1, 126.0, 125.9, 124.7, 123.3, 121.6, 52.4, 51.9, 21.2; **HRMS (ESI-TOF)**  $m/z$  calcd for  $C_{21}H_{20}NO_4$   $[M + H]^+$  350.1387, found 350.1419.

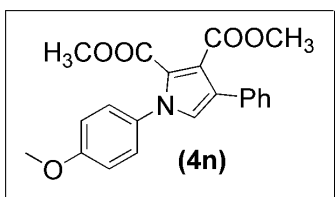

**1-(4-Methoxy-phenyl)-4-phenyl-1H-pyrrole-2,3-dicarboxylic acid dimethyl ester (4n):**

Obtained as a yellow viscous oil (332.2 mg, 91%

yield);  $^1\text{H}$  NMR (400 MHz,  $\text{CDCl}_3$ )  $\delta$  ppm: 7.43 - 7.45 (m, 2H), 7.35 - 7.39 (m, 2H), 7.26 - 7.31 (m, 3H), 6.95 - 6.97 (m, 2H), 6.94 (s, 1H), 3.85 (s, 6H), 3.72 (s, 3H);  $^{13}\text{C}$  NMR (100 MHz,  $\text{CDCl}_3$ )  $\delta$  ppm: 166.8, 160.4, 159.5, 133.2, 132.3, 128.6, 127.7, 127.3, 127.1, 126.3, 124.6, 123.3, 121.5, 114.0, 55.5, 52.4, 51.9; **HRMS (ESI-TOF)**  $m/z$  calcd for  $\text{C}_{21}\text{H}_{20}\text{NO}_5$   $[\text{M} + \text{H}]^+$  366.1336, found 366.1343.

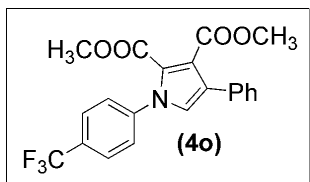

**4-Phenyl-1-(4-trifluoromethyl-phenyl)-1H-pyrrole-2,3-dicarboxylic acid dimethyl ester (4o):** Obtained as a yellow viscous oil (298.2 mg, 74% yield);  $^1\text{H}$  NMR (400 MHz,  $\text{CDCl}_3$ )  $\delta$  ppm: 7.74 (d,  $J$  = 8.4 Hz, 2H), 7.43 - 7.49 (m, 4H), 7.36 - 7.40 (t, 2H), 7.29 - 7.33 (m, 1H), 7.02 (s, 1H), 3.86 (s, 3H), 3.74 (s, 3H);  $^{13}\text{C}$  NMR (100 MHz,  $\text{CDCl}_3$ )  $\delta$  ppm: 166.5, 160.1, 142.3, 132.7, 130.6, 128.7, 127.6, 127.4, 126.7, 126.2, 125.8, 125.4, 122.9, 117.0, 55.6, 52.1; **HRMS (ESI-TOF)**  $m/z$  calcd for  $\text{C}_{21}\text{H}_{17}\text{FNO}_4$   $[\text{M} + \text{H}]^+$  404.1104, found 404.1103.

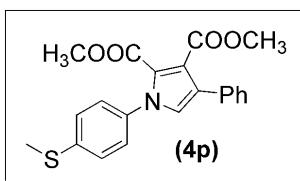

**1-(4-Methylsulfanyl-phenyl)-4-phenyl-1H-pyrrole-2,3-dicarboxylic acid dimethyl ester (4p):** Obtained as a yellow viscous oil (346.7 mg, 91% yield);  $^1\text{H}$  NMR (400 MHz,  $\text{CDCl}_3$ )  $\delta$  ppm: 7.43 - 7.45 (m, 2H), 7.36 - 7.40 (m, 2H), 7.28 - 7.32 (m, 5H), 6.98 (s, 1H), 3.85 (s, 3H), 3.73 (s, 3H), 2.53 (s, 3H);  $^{13}\text{C}$  NMR (100 MHz,  $\text{CDCl}_3$ )  $\delta$  ppm: 166.7, 160.4, 139.6, 136.3, 133.1, 128.6, 127.7, 127.2, 126.5, 126.4, 126.0, 124.7, 123.0, 121.9, 52.4, 52.0, 15.6; **HRMS (ESI-TOF)**  $m/z$  calcd for  $\text{C}_{21}\text{H}_{20}\text{SNO}_4$   $[\text{M} + \text{H}]^+$  382.1108, found 382.1153.

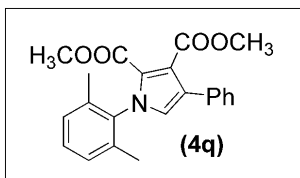

**1-(2,6-Dimethyl-phenyl)-4-phenyl-1H-pyrrole-2,3-dicarboxylic acid dimethyl ester (4q):** Obtained as a yellow viscous oil (265.1 mg, 73% yield);  $^1\text{H}$  NMR (400 MHz,  $\text{CDCl}_3$ )  $\delta$  ppm: 7.46 (d,  $J = 7.6$  Hz, 2H), 7.36 - 7.39 (m, 2H), 7.23 - 7.31 (m, 2H), 7.14 (d,  $J = 7.6$  Hz, 2H), 6.85 (s, 1H), 3.86 (s, 3H), 3.67 (s, 3H), 2.05 (s, 6H);  $^{13}\text{C}$  NMR (100 MHz,  $\text{CDCl}_3$ )  $\delta$  ppm: 166.7, 160.4, 138.3, 135.6, 133.3, 128.8, 128.7, 128.0, 127.5, 127.1, 125.2, 124.7, 122.6, 121.3, 52.4, 51.9, 17.5; **HRMS (ESI-TOF)**  $m/z$  calcd for  $\text{C}_{22}\text{H}_{22}\text{NO}_4$   $[\text{M} + \text{H}]^+$  364.1543, found 364.1547.

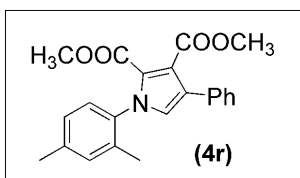

**1-(2,4-Dimethyl-phenyl)-4-phenyl-1H-pyrrole-2,3-dicarboxylic acid dimethyl ester (4r):** Obtained as a yellow viscous oil (297.7 mg, 82% yield);  $^1\text{H}$  NMR (400 MHz,  $\text{CDCl}_3$ )  $\delta$  ppm: 7.44 - 7.46 (t, 2H), 7.36 - 7.39 (m, 2H), 7.27 - 7.33 (m, 1H), 7.01 - 7.12 (m, 3H), 6.91 (s, 1H), 3.87 (s, 3H), 3.69 (s, 3H), 2.38 (s, 3H), 2.07 (s, 3H);  $^{13}\text{C}$  NMR (100 MHz,  $\text{CDCl}_3$ )  $\delta$  ppm: 167.1, 160.0, 138.9, 136.4, 135.0, 133.3, 131.2, 128.7, 127.5, 127.1, 127.0, 125.9, 124.5, 123.0, 121.4, 52.5, 51.8, 21.2, 17.3; **HRMS (ESI-TOF)**  $m/z$  calcd for  $\text{C}_{22}\text{H}_{22}\text{NO}_4$   $[\text{M} + \text{H}]^+$  364.1543, found 364.1589.

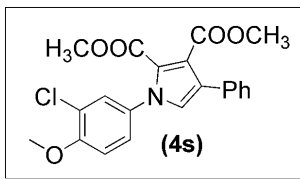

**1-(3-Chloro-4-methoxy-phenyl)-4-phenyl-1H-pyrrole-2,3-dicarboxylic acid dimethyl ester (4s):** Obtained as a yellow viscous oil (327.2 mg, 82% yield);  $^1\text{H}$  NMR (400 MHz,  $\text{CDCl}_3$ )  $\delta$  ppm: 7.34 - 7.43 (m, 5H), 7.29 (d,  $J = 7.2$  Hz, 1H), 7.23 (d,  $J = 8.8$  Hz, 1H), 6.96 (s, 1H), 3.93 (s, 3H), 3.84 (s, 3H), 3.73 (s, 3H);  $^{13}\text{C}$  NMR (100 MHz,  $\text{CDCl}_3$ )  $\delta$  ppm: 166.7, 160.2, 132.9, 132.5, 128.6, 128.5, 128.2, 127.7, 127.6, 127.2, 126.2, 125.8, 124.8, 122.4, 122.0, 111.5, 56.3, 52.4, 52.0; **HRMS**

(ESI-TOF)  $m/z$  calcd for  $C_{21}H_{19}ClNO_5$   $[M + H]^+$  400.0946, found 400.0962.

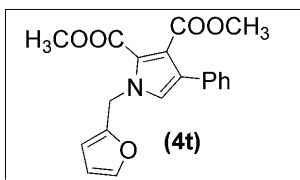

**1-Furan-2-ylmethyl-4-phenyl-1H-pyrrole-2,3-dicarboxylic acid dimethyl ester (4t):** Obtained as a yellow viscous oil (294.9 mg, 87% yield);  $^1H$  NMR (400 MHz,  $CDCl_3$ )  $\delta$  ppm: 7.31 - 7.38 (m, 5H), 7.23 - 7.27 (m, 1H), 6.99 (s, 1H), 6.37 (d,  $J = 3.2$  Hz), 6.31 (q, 1H), 5.50 (s, 2H), 3.84 (s, 3H), 3.81 (s, 3H);  $^{13}C$  NMR (100 MHz,  $CDCl_3$ )  $\delta$  ppm: 167.3, 160.7, 149.7, 142.9, 132.3, 128.6, 127.3, 127.0, 125.5, 123.9, 122.4, 120.5, 110.6, 109.4, 52.4, 51.9, 45.0; **HRMS (ESI-TOF)**  $m/z$  calcd for  $C_{19}H_{18}NO_5$   $[M + H]^+$  340.1180, found 340.1183.

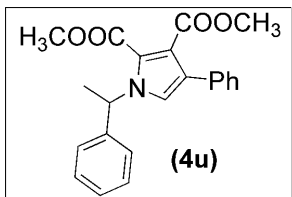

**4-Phenyl-1-(1-phenyl-ethyl)-1H-pyrrole-2,3-dicarboxylic acid dimethyl ester (4u):** Obtained as a pale yellow viscous oil (304.9 mg, 84% yield);  $^1H$  NMR (400 MHz,  $CDCl_3$ )  $\delta$  ppm: 7.31 - 7.38 (m, 6H), 7.21 - 7.28 (m, 4H), 7.02 (s, 1H), 6.48 (q, 1H), 3.81 (s, 3H), 3.79 (s, 3H), 1.83 (d,  $J = 6.8$  Hz, 3H);  $^{13}C$  NMR (100 MHz,  $CDCl_3$ )  $\delta$  ppm: 167.4, 160.9, 141.7, 133.6, 128.8, 128.6, 127.8, 127.5, 127.0, 126.5, 124.1, 122.4, 122.0, 121.5, 56.0, 52.4, 51.9, 22.0; **HRMS (ESI-TOF)**  $m/z$  calcd for  $C_{22}H_{22}NO_4$   $[M + H]^+$  364.1543, found 364.1552.

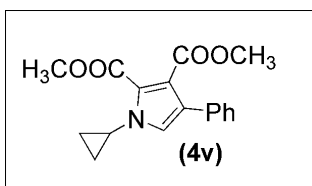

**1-Cyclopropyl-4-phenyl-1H-pyrrole-2,3-dicarboxylic acid dimethyl ester (4v):** Obtained as an orange viscous oil (203.3 mg, 68% yield);  $^1H$  NMR (400 MHz,  $CDCl_3$ )  $\delta$  ppm: 7.31 - 7.37 (m, 4H), 7.24 - 7.27 (m, 1H), 6.93 (s, 1H), 3.87 (s, 3H), 3.81 (s, 3H), 3.68 - 3.74 (m, 1H), 1.04 - 1.09 (m, 2H), 0.96 - 1.02

(m, 2H);  $^{13}\text{C}$  NMR (100 MHz,  $\text{CDCl}_3$ )  $\delta$  ppm: 166.9, 160.6, 133.5, 128.5, 127.5, 126.9, 124.1, 123.5, 123.3, 121.6, 52.3, 51.8, 31.5, 7.5; **HRMS (ESI-TOF)**  $m/z$  calcd for  $\text{C}_{17}\text{H}_{18}\text{NO}_4$   $[\text{M} + \text{H}]^+$  300.1230, found 300.1236.

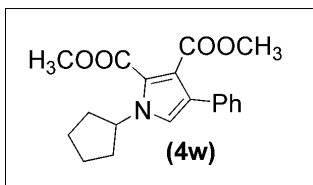

**1-Cyclopentyl-4-phenyl-1H-pyrrole-2,3-dicarboxylic acid dimethyl ester (4w):** Obtained as a orange viscous oil (271.4 mg, 83% yield);  $^1\text{H}$  NMR (400 MHz,  $\text{CDCl}_3$ )  $\delta$  ppm: 7.32 - 7.40 (m, 4H), 7.23 - 7.27 (m, 1H), 7.04 (s, 1H), 5.36 - 5.41 (m, 1H), 3.83 (s, 3H), 3.80 (s, 3H), 2.18 - 2.22 (m, 2H), 1.72 - 1.84 (m, 6H);  $^{13}\text{C}$  NMR (100 MHz,  $\text{CDCl}_3$ )  $\delta$  ppm: 167.3, 161.0, 133.7, 128.5, 127.5, 126.8, 123.9, 121.9, 121.4, 121.3, 58.8, 52.2, 51.8, 33.8, 24.0; **HRMS (ESI-TOF)**  $m/z$  calcd for  $\text{C}_{19}\text{H}_{22}\text{NO}_4$   $[\text{M} + \text{H}]^+$  328.1543, found 328.1528.

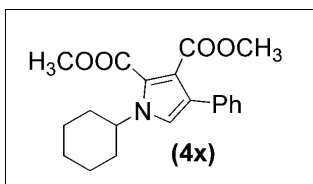

**1-Cyclohexyl-4-phenyl-1H-pyrrole-2,3-dicarboxylic acid dimethyl ester (4x):** Obtained as a orange viscous oil (296.7 mg, 87% yield);  $^1\text{H}$  NMR (400 MHz,  $\text{CDCl}_3$ )  $\delta$  ppm: 7.32 - 7.40 (m, 4H), 7.24 - 7.27 (m, 1H), 7.08 (s, 1H), 4.87 - 4.92 (m, 1H), 3.84 (s, 3H), 3.81 (s, 3H), 2.14 (d,  $J = 11.2$  Hz, 2H), 1.90 (d,  $J = 12.8$  Hz, 2H), 1.43 - 1.64 (m, 4H), 1.17 - 1.26 (m, 2H);  $^{13}\text{C}$  NMR (100 MHz,  $\text{CDCl}_3$ )  $\delta$  ppm: 167.5, 160.9, 133.7, 128.6, 127.4, 126.8, 123.8, 121.40, 121.38, 120.9, 57.0, 52.3, 51.8, 34.7, 25.8, 25.5; **HRMS (ESI-TOF)**  $m/z$  calcd for  $\text{C}_{20}\text{H}_{24}\text{NO}_4$   $[\text{M} + \text{H}]^+$  342.1700, found 342.1700.

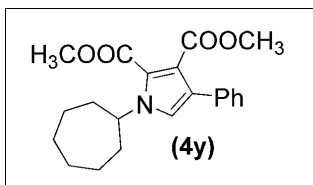

**1-Cycloheptyl-4-phenyl-1H-pyrrole-2,3-dicarboxylic acid dimethyl ester (4y):** Obtained as a orange viscous oil (269.8 mg, 76% yield);  $^1\text{H}$



**NMR** (400 MHz, DMSO- $d_6$ )  $\delta$  ppm: 7.60 (s, 1H), 7.34 - 7.41 (m, 4H), 7.23 - 7.27 (m, 1H), 4.87 - 4.92 (m, 1H), 3.77 (s, 3H), 3.75 (s, 3H), 1.90 - 2.02 (m, 4H), 1.73 - 1.78 (m, 2H), 1.45 - 1.66 (m, 6H);  **$^{13}\text{C}$  NMR** (100 MHz, DMSO- $d_6$ )  $\delta$  ppm: 167.2, 160.8, 133.8, 129.0, 127.2, 127.0, 123.3, 123.0, 120.9, 120.7, 59.1, 52.5, 52.3, 36.2, 27.3, 24.6; **HRMS (ESI-TOF)**  $m/z$  calcd for  $\text{C}_{21}\text{H}_{26}\text{NO}_4$   $[\text{M} + \text{H}]^+$  356.1856, found 356.1834.

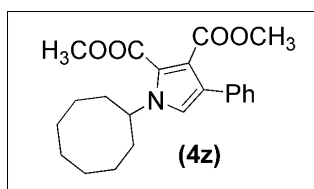

**1-Cyclooctyl-4-phenyl-1H-pyrrole-2,3-dicarboxylic acid dimethyl ester (4z):** Obtained as a orange viscous oil (262.0 mg, 71% yield);  **$^1\text{H}$  NMR** (400 MHz,  $\text{CDCl}_3$ )  $\delta$  ppm: 7.32 - 7.40 (m, 4H), 7.24 - 7.27 (m, 1H), 7.05 (s, 1H), 5.26 - 5.33 (m, 1H), 3.84 (s, 3H), 3.81 (s, 3H), 1.91 - 2.07 (m, 4H), 1.52 - 1.79 (m, 10H);  **$^{13}\text{C}$  NMR** (100 MHz,  $\text{CDCl}_3$ )  $\delta$  ppm: 167.6, 161.0, 133.8, 128.6, 127.4, 126.8, 124.0, 123.4, 122.0, 121.1, 120.6, 57.3, 52.3, 51.2, 34.8, 26.6, 26.2, 24.6; **HRMS (ESI-TOF)**  $m/z$  calcd for  $\text{C}_{22}\text{H}_{28}\text{NO}_4$   $[\text{M} + \text{H}]^+$  370.2013, found 370.2012.

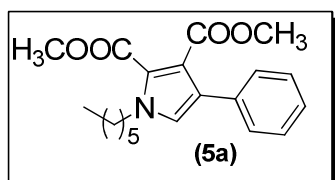

**1-Hexyl-4-phenyl-1H-pyrrole-2,3-dicarboxylic acid dimethyl ester (5a):** Obtained as a yellow viscous oil (266.5 mg, 81% yield);  **$^1\text{H}$  NMR** (400 MHz,  $\text{CDCl}_3$ )  $\delta$  ppm: 7.32 - 7.39 (m, 4H), 7.25 - 7.27 (t, 1H), 6.91 (s, 1H), 4.25 - 4.29 (t, 2H), 3.83 (s, 3H), 3.81 (s, 3H), 1.76 - 1.80 (m, 2H), 1.24 - 1.36 (m, 6H), 0.87 - 0.90 (t, 3H);  **$^{13}\text{C}$  NMR** (100 MHz,  $\text{CDCl}_3$ )  $\delta$  ppm: 167.4, 160.7, 133.5, 128.6, 127.3, 126.8, 125.5, 123.5, 122.0, 120.6, 52.3, 51.7, 49.7, 31.5, 31.4, 26.3, 22.5, 14.0; **HRMS (ESI-TOF)**  $m/z$  calcd for  $\text{C}_{20}\text{H}_{26}\text{NO}_4$   $[\text{M} + \text{H}]^+$  344.1856, found 344.1858.

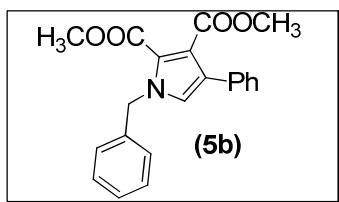

**1-Benzyl-4-phenyl-1H-pyrrole-2,3-dicarboxylic acid**

**dimethyl ester (5b):** Obtained as a colorless oil (307.1 mg, 88% yield);  $^1\text{H}$  NMR (400 MHz,  $\text{CDCl}_3$ )  $\delta$  ppm: 7.31 - 7.39 (m, 7H), 7.23 - 7.29 (m, 3H), 7.16 - 7.18 (m, 2H), 6.94 (s, 1H), 5.52 (s, 2H), 3.82 (s, 3H), 3.78 (s, 3H);  $^{13}\text{C}$  NMR (100 MHz,  $\text{CDCl}_3$ )  $\delta$  ppm: 167.3, 160.7, 137.1, 133.3, 128.9, 128.7, 127.9, 127.4, 127.2, 127.0, 125.8, 124.0, 122.3, 121.2, 52.5, 51.9; **HRMS (ESI-TOF)**  $m/z$  calcd for  $\text{C}_{21}\text{H}_{20}\text{NO}_4$   $[\text{M} + \text{H}]^+$  350.1387, found 350.1396.

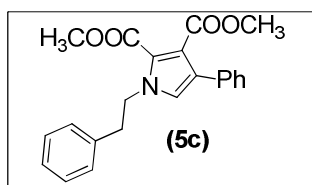

**1-Phenethyl-4-phenyl-1H-pyrrole-2,3-dicarboxylic acid**

**dimethyl ester (5c):** Obtained as a pale orange viscous oil (290.4 mg, 80% yield);  $^1\text{H}$  NMR (400 MHz,  $\text{CDCl}_3$ )  $\delta$  ppm: 7.23 - 7.34 (m, 8H), 7.15 - 7.17 (m, 2H), 6.69 (s, 1H), 4.47 - 4.51 (t, 2H), 3.85 (s, 3H), 3.82 (s, 3H), 3.05 - 3.09 (t, 2H);  $^{13}\text{C}$  NMR (100 MHz,  $\text{CDCl}_3$ )  $\delta$  ppm: 167.4, 160.7, 137.9, 133.4, 128.9, 128.7, 128.6, 127.3, 126.9, 126.8, 125.8, 123.4, 122.4, 120.3, 52.4, 51.8, 51.3, 38.2; **HRMS (ESI-TOF)**  $m/z$  calcd for  $\text{C}_{22}\text{H}_{22}\text{NO}_4$   $[\text{M} + \text{H}]^+$  364.1543, found 364.1545.

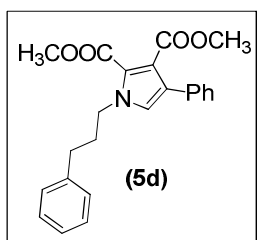

**4-Phenyl-1-(3-phenyl-propyl)-1H-pyrrole-2,3-dicarboxylic acid**

**acid dimethyl ester (5d):** Obtained as a pale orange viscous oil (309.1 mg, 82% yield);  $^1\text{H}$  NMR (400 MHz,  $\text{CDCl}_3$ )  $\delta$  ppm: 7.33 - 7.38 (m, 4H), 7.24 - 7.31 (m, 3H), 7.16 - 7.21 (m, 3H), 6.86 (s, 1H), 4.26 - 4.29 (t, 2H), 3.81 (s, 2H), 3.80 (s, 3H), 2.63 -

2.67 (t, 2H), 2.08 - 2.16 (q, 2H);  $^{13}\text{C}$  NMR (100 MHz,  $\text{CDCl}_3$ )  $\delta$  ppm: 167.5, 160.6, 140.9, 133.5, 128.7, 128.6, 128.4, 127.3, 127.0, 126.2, 125.6, 123.6, 122.3, 120.7, 52.4, 51.8, 49.1, 32.80, 32.77; **HRMS (ESI-TOF)**  $m/z$  calcd for  $\text{C}_{23}\text{H}_{24}\text{NO}_4$   $[\text{M} + \text{H}]^+$  378.1700, found 378.1714.

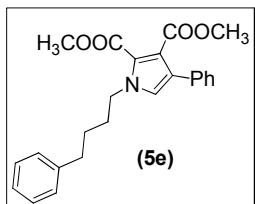

**4-Phenyl-1-(4-phenyl-butyl)-1H-pyrrole-2,3-dicarboxylic acid dimethyl ester (5e):** Obtained as a yellow viscous oil (316.7 mg, 81% yield);  $^1\text{H}$  NMR (400 MHz,  $\text{CDCl}_3$ )  $\delta$  ppm: 7.32 - 7.38 (m, 4H), 7.24 - 7.29 (m, 3H), 7.15 - 7.20 (m, 3H), 6.88 (s, 1H), 4.27 - 4.31 (t, 2H), 3.82 (s, 6H), 2.62 - 2.65 (t, 2H), 1.79 - 1.87 (m, 2H), 1.62 - 1.69 (m, 2H);  $^{13}\text{C}$  NMR (100 MHz,  $\text{CDCl}_3$ )  $\delta$  ppm: 167.5, 160.6, 141.9, 133.5, 128.7, 128.5, 128.4, 127.3, 126.9, 126.0, 125.6, 123.5, 122.1, 120.6, 52.4, 51.8, 49.5, 35.5, 31.1, 28.5; **HRMS (ESI-TOF)**  $m/z$  calcd for  $\text{C}_{24}\text{H}_{26}\text{NO}_4$   $[\text{M} + \text{H}]^+$  392.1856, found 392.1914.

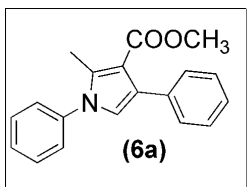

**2-Methyl-1,4-diphenyl-1H-pyrrole-3-carboxylic acid methyl ester (6a):** Obtained as a yellow viscous oil (224.1 mg, 77% yield);  $^1\text{H}$  NMR (400 MHz,  $\text{CDCl}_3$ )  $\delta$  ppm: 7.47 - 7.51 (m, 2H), 7.39 - 7.43 (m, 3H), 7.32 - 7.37 (m, 4H), 7.25 - 7.29 (m, 1H), 6.72 (s, 1H), 3.70 (s, 3H), 2.46 (s, 3H);  $^{13}\text{C}$  NMR (100 MHz,  $\text{CDCl}_3$ )  $\delta$  ppm: 166.3, 139.0, 136.8, 135.5, 129.4, 129.2, 128.7, 128.2, 127.7, 126.8, 126.6, 126.4, 121.0, 50.7, 12.8; **HRMS (ESI-TOF)**  $m/z$  calcd for  $\text{C}_{19}\text{H}_{18}\text{NO}_2$   $[\text{M} + \text{H}]^+$  292.1332, found 292.1367.

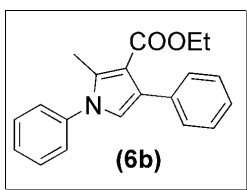

**2-Methyl-1,4-diphenyl-1H-pyrrole-3-carboxylic acid ethyl ester (6b):** Obtained as a yellow viscous oil (219.6 mg, 72% yield);  $^1\text{H}$  NMR (400 MHz,  $\text{CDCl}_3$ )  $\delta$  ppm: 7.47 - 7.51 (m, 2H), 7.42 - 7.44 (m, 3H), 7.32 - 7.38 (m, 4H), 7.25 - 7.29 (m, 1H), 6.72 (s, 1H), 4.16 - 4.21 (m, 2H), 2.46 (s, 3H), 1.13 - 1.16 (t, 3H);  $^{13}\text{C}$  NMR (100 MHz,  $\text{CDCl}_3$ )  $\delta$  ppm: 165.9, 139.0, 136.6, 135.6, 129.4, 129.3, 129.1, 128.1, 127.6, 126.4, 126.3, 120.9, 111.8, 59.5, 14.1, 12.7; **HRMS (ESI-TOF)**  $m/z$  calcd for  $\text{C}_{20}\text{H}_{20}\text{NO}_2$   $[\text{M} + \text{H}]^+$  306.1489, found 306.1530.

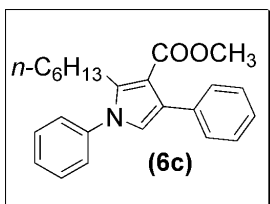

**2-Hexyl-1,4-diphenyl-1H-pyrrole-3-carboxylic acid methyl ester (6c):** Obtained as a yellow viscous oil (227.4 mg, 63% yield);  $^1\text{H}$  NMR (400 MHz,  $\text{CDCl}_3$ )  $\delta$  ppm: 7.40 - 7.48 (m, 5H), 7.30 - 7.35 (m, 4H), 7.23 - 7.26 (m, 1H), 6.65 (s, 1H), 3.68 (s, 3H), 2.81 - 2.85 (t, 2H), 1.45 - 1.50 (m, 2H), 1.17 - 1.22 (m, 6H), 0.79 - 0.83 (t, 3H);  $^{13}\text{C}$  NMR (100 MHz,  $\text{CDCl}_3$ )  $\delta$  ppm: 166.2, 142.0, 139.1, 135.7, 129.3, 129.1, 128.4, 127.7, 126.9, 126.5, 126.3, 122.4, 110.6, 50.7, 31.3, 30.1, 29.2, 25.8, 22.6, 14.1; **HRMS (ESI-TOF)**  $m/z$  calcd for  $\text{C}_{24}\text{H}_{28}\text{NO}_2$   $[\text{M} + \text{H}]^+$  362.2115, found 362.2113.

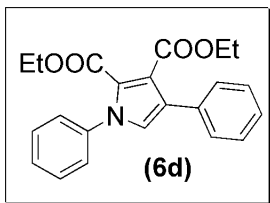

**1,4-Diphenyl-1H-pyrrole-2,3-dicarboxylic acid diethyl ester (6d):** Obtained as a yellow viscous oil (323.1 mg, 89% yield);  $^1\text{H}$  NMR (400 MHz,  $\text{CDCl}_3$ )  $\delta$  ppm: 7.43 - 7.47 (m, 4H), 7.34 - 7.38 (m, 4H), 7.25 - 7.30 (m, 2H), 6.99 (s, 1H), 4.29 - 4.35 (m, 2H), 4.13 - 4.19 (m, 2H), 1.27 - 1.30 (t, 3H), 1.13 - 1.67 (t, 3H);  $^{13}\text{C}$  NMR (100 MHz,  $\text{CDCl}_3$ )  $\delta$  ppm: 166.3, 159.9, 139.6, 133.3, 128.9, 128.52,

128.48, 127.8, 127.1, 126.3, 1253.7, 124.8, 122.7, 120.1, 61.4, 60.8, 14.1, 13.9;

**HRMS (ESI-TOF)**  $m/z$  calcd for  $C_{22}H_{22}NO_4$   $[M + H]^+$  364.1543, found 364.1517.

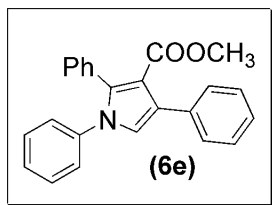

**1,2,4-Triphenyl-1H-pyrrole-3-carboxylic acid methyl ester**

**(6e):** Obtained as a pale orange solid (335.4 mg, 95% yield), mp 98 - 100 °C; **<sup>1</sup>H NMR** (400 MHz,  $CDCl_3$ )  $\delta$  ppm: 7.50 (d,  $J = 7.2$ Hz, 2H), 7.35 - 7.41 (m, 3H), 7.22 - 7.32 (m, 9H), 7.09 (d,  $J = 6.8$ Hz, 1H), 6.96 (s, 1H), 3.55 (s, 3H); **<sup>13</sup>C NMR** (100 MHz,  $CDCl_3$ )  $\delta$  ppm: 165.3, 138.6, 137.2, 134.4, 130.7, 130.4, 128.4, 128.2, 127.4, 127.3, 127.0, 126.7, 126.2, 126.0, 125.4, 121.5, 112.8, 50.3; **HRMS (ESI-TOF)**  $m/z$  calcd for  $C_{24}H_{20}NO_2$   $[M + H]^+$  354.1489, found 354.1488.

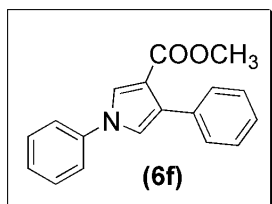

**1,4-Diphenyl-1H-pyrrole-3-carboxylic acid methyl ester (6f):**

Obtained as a yellow viscous oil (188.4 mg, 68% yield); **<sup>1</sup>H NMR** (400 MHz,  $CDCl_3$ )  $\delta$  ppm: 7.77 (d,  $J = 2.8$ Hz, 1H), 7.54 (d,  $J = 7.6$ Hz, 2H), 7.43 - 7.49 (m, 4H), 7.28 - 7.40 (m, 4H), 7.07 (d,  $J = 6.4$ Hz, 1H), 3.76 (s, 3H); **<sup>13</sup>C NMR** (100 MHz,  $CDCl_3$ )  $\delta$  ppm: 164.9, 139.6, 134.3, 129.9, 129.3, 128.5, 127.9, 120, 126.9, 126.1, 120.8, 119.8, 115.1, 51.1; **HRMS (ESI-TOF)**  $m/z$  calcd for  $C_{18}H_{16}NO_2$   $[M + H]^+$  278.1176, found 278.1177.

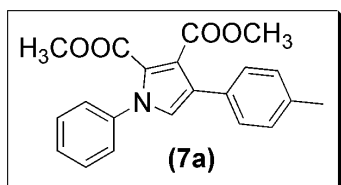

**1-Phenyl-4-p-tolyl-1H-pyrrole-2,3-dicarboxylic acid**

**dimethyl ester (7a):** Obtained as a yellow viscous oil (321.1 mg, 92% yield); **<sup>1</sup>H**

**NMR** (400 MHz, CDCl<sub>3</sub>)  $\delta$  ppm: 7.43 - 7.47 (m, 4H), 7.33 - 7.36 (m, 4H), 7.17 - 7.19 (m, 2H), 6.99 (s, 1H), 3.85 (s, 3H), 3.71 (s, 3H), 2.36 (s, 3H); **<sup>13</sup>C NMR** (100 MHz, CDCl<sub>3</sub>)  $\delta$  ppm: 166.8, 160.4, 139.5, 136.9, 130.2, 129.4, 128.5, 127.6, 126.2, 125.8, 124.9, 122.9, 121.8, 52.4, 51.9, 21.2; **HRMS (ESI-TOF)**  $m/z$  calcd for C<sub>21</sub>H<sub>20</sub>NO<sub>4</sub> [M + H]<sup>+</sup> 350.1387, found 350.1385.

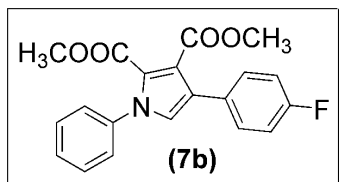

**4-(4-Fluoro-phenyl)-1-phenyl-1H-pyrrole-2,3-dicarboxylic acid dimethyl ester (7b):** Obtained as a yellow solid (268.3 mg, 76% yield), mp 74 - 76 °C; **<sup>1</sup>H NMR** (400 MHz, dms<sub>o</sub>-d<sub>6</sub>)  $\delta$  ppm: 7.57 (s, 1H), 7.46 - 7.52 (m, 6H), 7.34 - 7.37 (m, 1H), 7.21 - 7.26 (m, 3H), 3.77 (s, 3H), 3.65 (s, 3H); **<sup>13</sup>C NMR** (100 MHz, dms<sub>o</sub>-d<sub>6</sub>)  $\delta$  ppm: 166.1, 160.4, 139.2, 132.8, 129.8, 129.5, 129.2, 128.8, 128.7, 126.9, 126.1, 123.0, 121.0, 52.7, 52.5; **HRMS (ESI-TOF)**  $m/z$  calcd for C<sub>20</sub>H<sub>17</sub>FNO<sub>4</sub> [M + H]<sup>+</sup> 354.1136, found 354.1144.

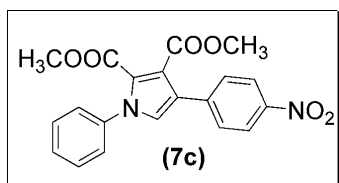

**4-(4-Nitro-phenyl)-1-phenyl-1H-pyrrole-2,3-dicarboxylic acid dimethyl ester (7c):** Obtained as a yellow solid (243.2 mg, 64% yield), mp 82 - 84 °C; **<sup>1</sup>H NMR** (400 MHz, CDCl<sub>3</sub>)  $\delta$  ppm: 7.66 (d,  $J$  = 8.0Hz, 2H), 7.66 (d,  $J$  = 8.4Hz, 2H), 7.47 - 7.50 (m, 3H), 7.34 - 7.36 (m, 3H), 7.07 (s, 1H), 3.86 (s, 3H), 3.73 (s, 3H); **<sup>13</sup>C NMR** (100 MHz, CDCl<sub>3</sub>)  $\delta$  ppm: 166.0, 160.4, 139.0, 138.0, 132.4, 129.1, 128.9, 128.3, 126.0, 125.9, 123.2, 120.8, 118.9, 110.6, 52.5, 52.2; **HRMS (ESI-TOF)**  $m/z$  calcd for C<sub>20</sub>H<sub>17</sub>N<sub>2</sub>O<sub>6</sub> [M + H]<sup>+</sup> 381.1081, found 381.1085.

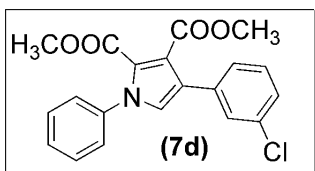

**4-(3-Chloro-phenyl)-1-phenyl-1H-pyrrole-2,3-dicarboxylic acid dimethyl ester:**

Obtained as a yellow viscous oil (273.1 mg, 74% yield);  $^1\text{H}$  NMR (400 MHz,  $\text{CDCl}_3$ )  $\delta$  ppm: 7.42 - 7.45 (m, 4H), 7.36 - 7.41 (m, 2H), 7.27 - 7.32 (m, 3H), 6.98 (s, 1H), 3.86 (s, 3H), 3.73 (s, 3H);  $^{13}\text{C}$  NMR (100 MHz,  $\text{CDCl}_3$ )  $\delta$  ppm: 166.7, 160.2, 137.9, 134.5, 132.9, 129.2, 128.7, 127.60, 127.55, 127.3, 126.0, 124.4, 122.4, 110.0, 52.5, 52.0; HRMS (ESI-TOF)  $m/z$  calcd for  $\text{C}_{20}\text{H}_{17}\text{ClNO}_4$   $[\text{M} + \text{H}]^+$  370.0841, found 370.0838.

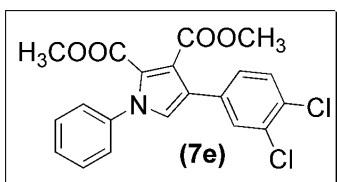

**4-(3,4-Dichloro-phenyl)-1-phenyl-1H-pyrrole-2,3-dicarboxylic acid dimethyl ester (7e):**

Obtained as a yellow viscous oil (274.1 mg, 68% yield);  $^1\text{H}$  NMR (400 MHz,  $\text{CDCl}_3$ )  $\delta$  ppm: 7.54 (d,  $J = 2.0\text{Hz}$ , 2H), 7.45 - 7.49 (m, 3H), 7.43 (s, 1H), 7.33 - 7.36 (m, 2H), 7.29 - 7.31 (m, 1H), 7.00 (s, 1H), 3.86 (s, 3H), 3.72 (s, 3H);  $^{13}\text{C}$  NMR (100 MHz,  $\text{CDCl}_3$ )  $\delta$  ppm: 166.0, 160.4, 139.1, 133.3, 132.5, 131.2, 130.4, 129.7, 129.1, 128.8, 127.2, 125.9, 125.7, 123.3, 122.8, 120.8, 52.5, 52.2; HRMS (ESI-TOF)  $m/z$  calcd for  $\text{C}_{20}\text{H}_{16}\text{Cl}_2\text{NO}_4$   $[\text{M} + \text{H}]^+$  404.0451, found 404.0497.

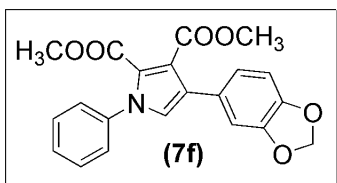

**4-Benzo[1,3]dioxol-5-yl-1-phenyl-1H-pyrrole-2,3-dicarboxylic acid dimethyl ester (7f):**

Obtained as a yellow solid (337.3 mg, 89% yield), mp 58 - 60 °C;  $^1\text{H}$  NMR (400 MHz,  $\text{CDCl}_3$ )  $\delta$  ppm: 7.43 - 7.49 (m, 3H), 7.38 - 7.40 (m, 2H), 7.24 - 7.28 (m, 4H), 7.03 - 7.08 (m, 1H), 6.96 (s, 1H), 3.76 (s, 3H), 3.70 (s, 3H);  $^{13}\text{C}$  NMR (100 MHz,  $\text{CDCl}_3$ )  $\delta$  ppm: 164.2, 161.7, 139.0, 135.4, 129.3, 129.1, 128.6, 126.8, 126.1, 125.4, 125.10, 125.06, 119.6, 115.7, 114.0, 113.7, 52.4, 51.8;

**HRMS (ESI-TOF)** m/z calcd for C<sub>21</sub>H<sub>18</sub>NO<sub>6</sub> [M + H]<sup>+</sup> 380.1129, found 380.1131. 7.

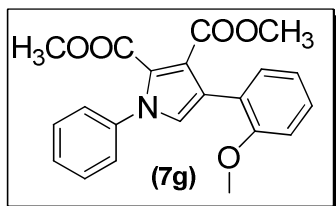

**4-(2-Methoxy-phenyl)-1-phenyl-1H-pyrrole-2,3-dicarboxylic acid dimethyl ester (7g):** Obtained as a yellow viscous oil (295.7 mg, 81% yield); <sup>1</sup>H NMR (400 MHz, CDCl<sub>3</sub>) δ ppm: 7.41 - 7.46 (m, 3H), 7.32 - 7.36 (m, 3H), 7.26 - 7.30 (m, 1H), 7.02 (s, 1H), 6.91 - 6.99 (m, 2H), 3.79 (s, 3H), 3.78 (s, 3H), 3.70 (s, 3H); <sup>13</sup>C NMR (100 MHz, CDCl<sub>3</sub>) δ ppm: 166.3, 160.7, 156.4, 139.7, 130.1, 128.9, 128.6, 128.3, 127.0, 126.0, 123.3, 122.6, 122.2, 121.3, 120.7, 110.7, 55.2, 51.93, 51.88; **HRMS (ESI-TOF)** m/z calcd for C<sub>21</sub>H<sub>20</sub>NO<sub>5</sub> [M + H]<sup>+</sup> 366.1336, found 366.1339.



# Copies of $^1\text{H}$ and $^{13}\text{C}$ NMR spectra of products

## Product 4a

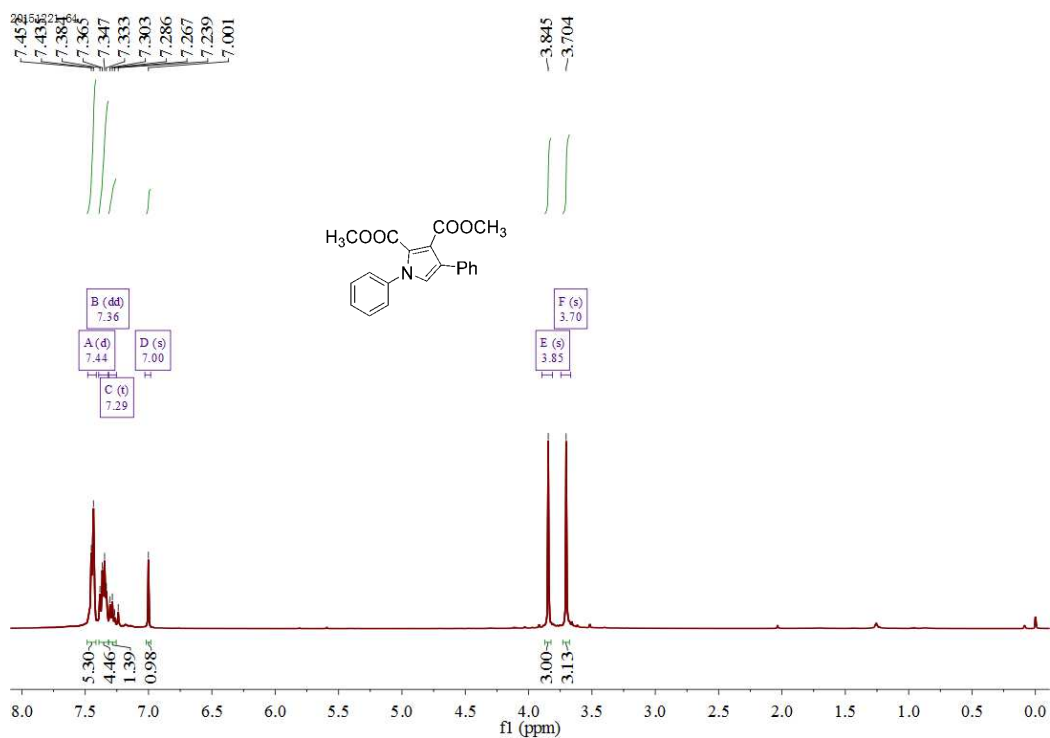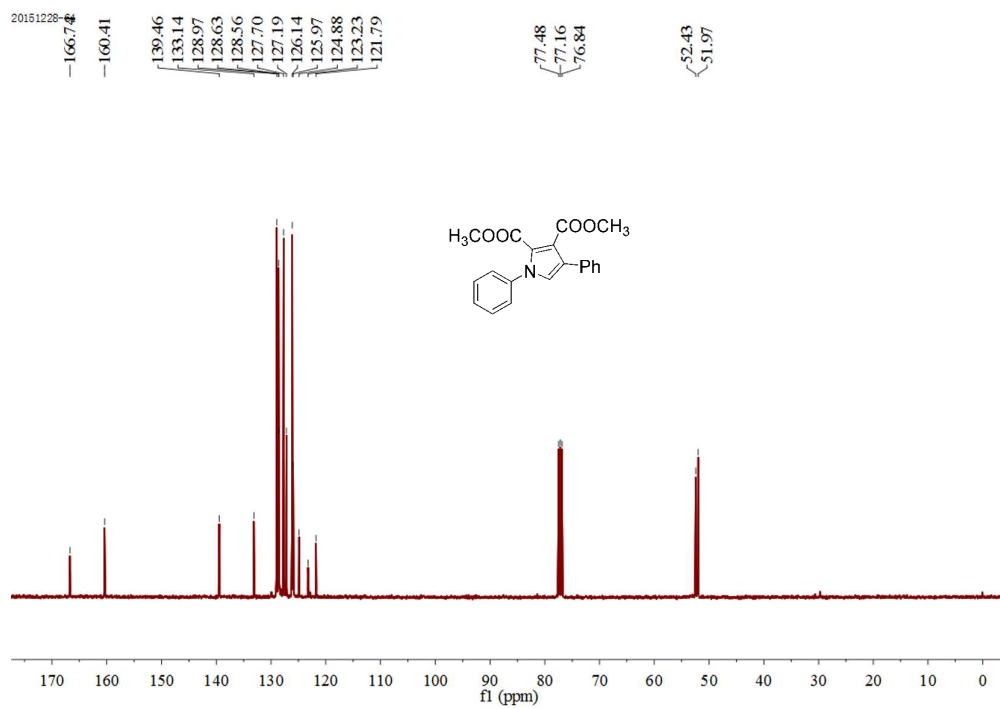

# Product 4b

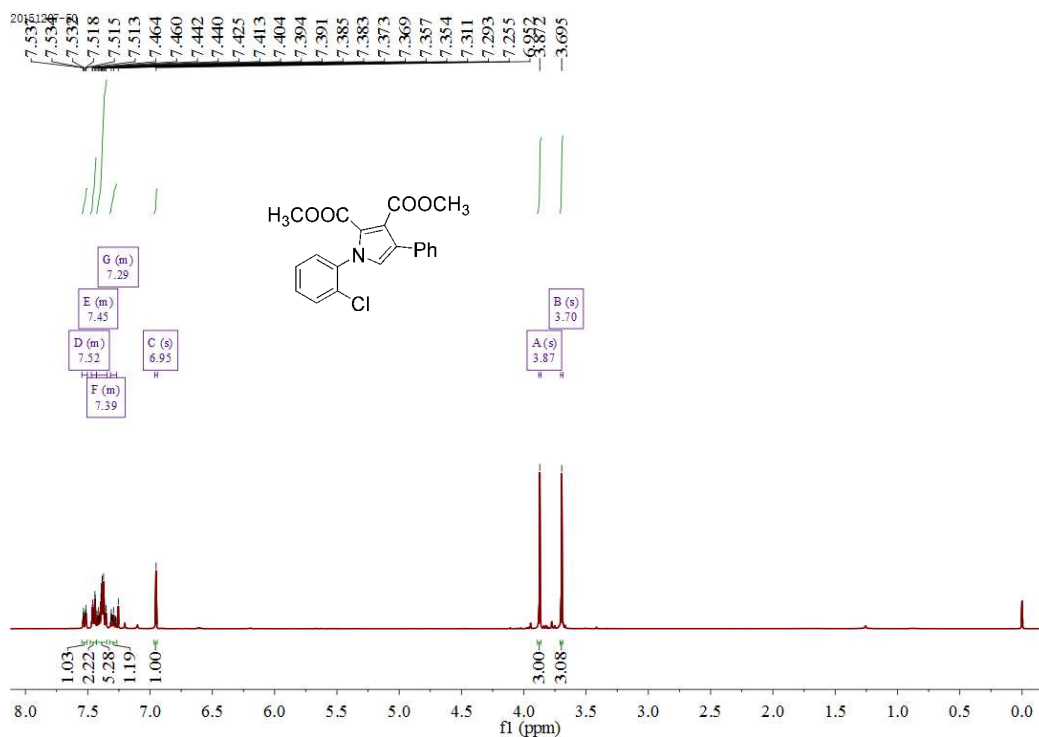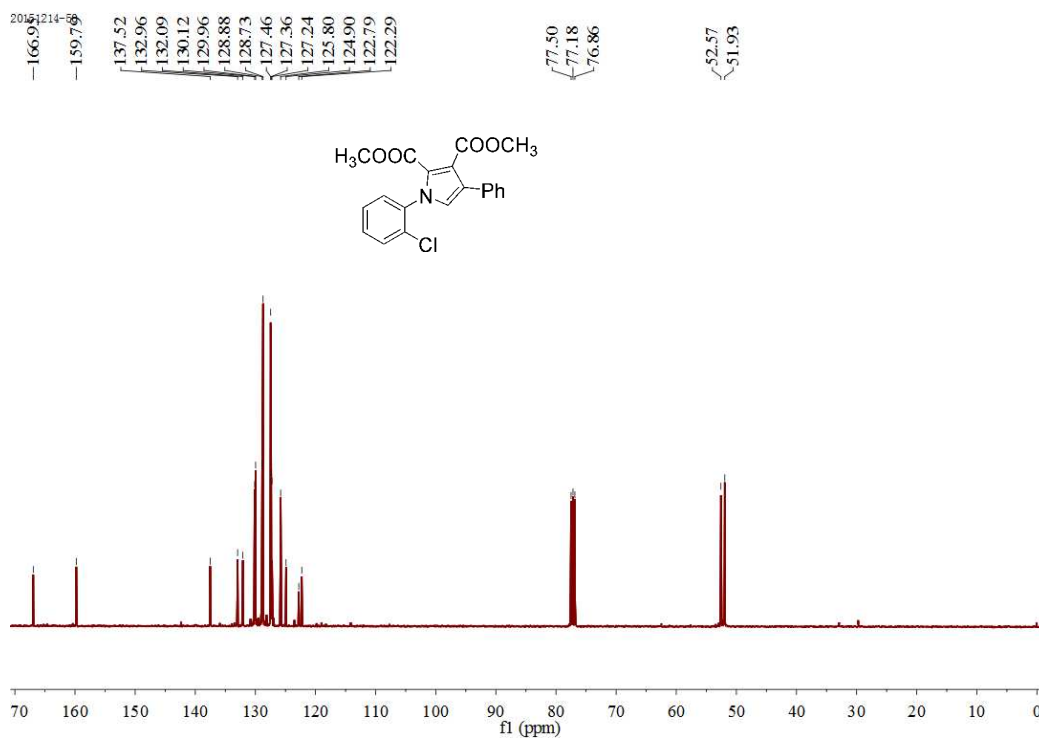

# Product 4c

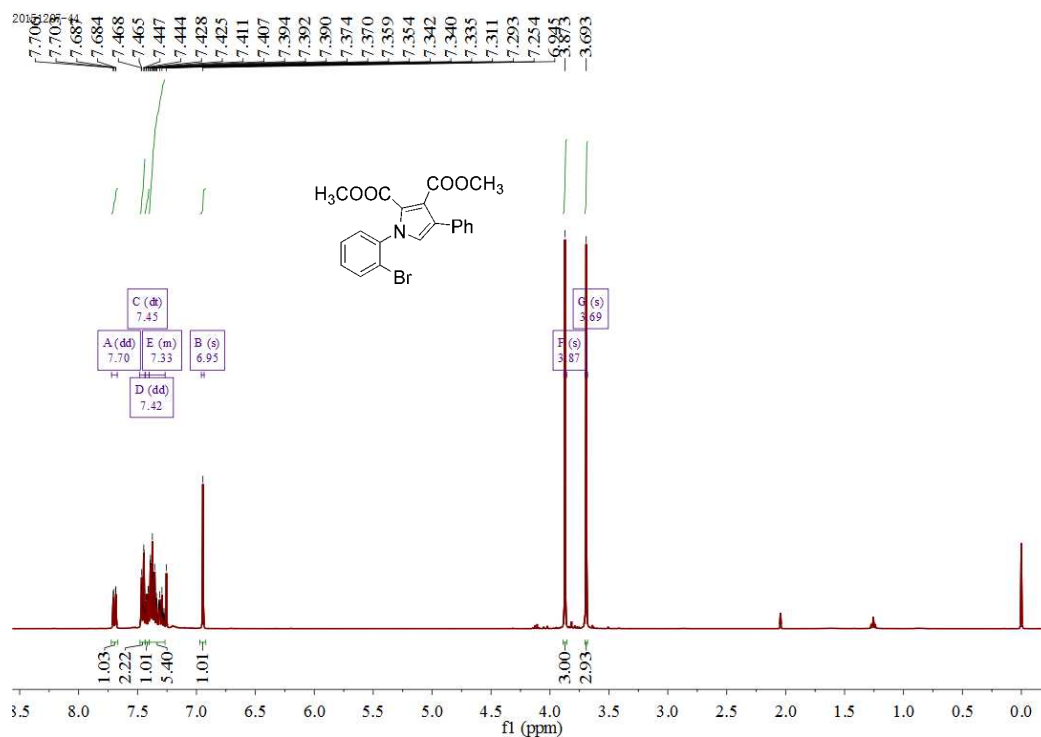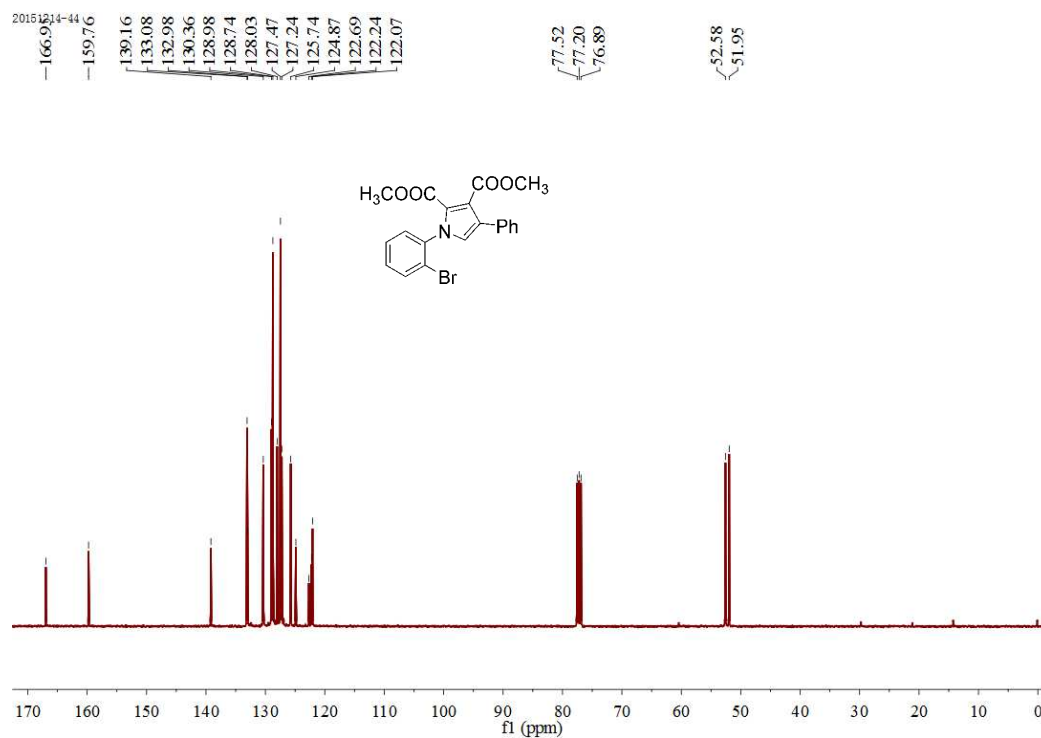

### Product 4d

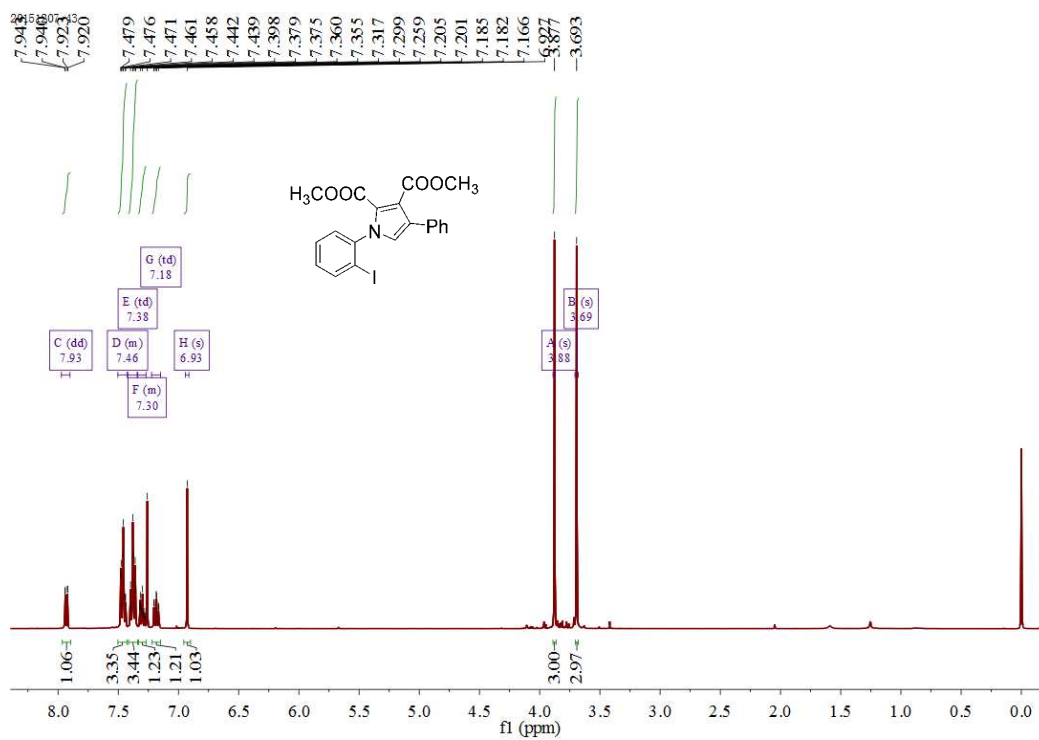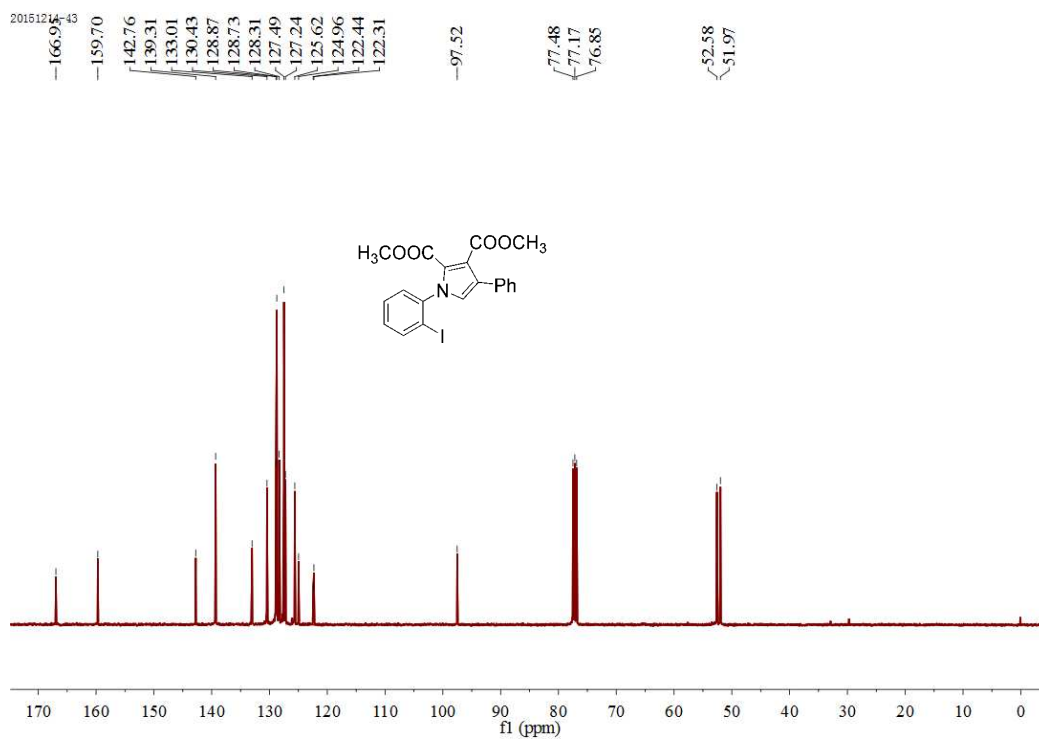

# Product 4e

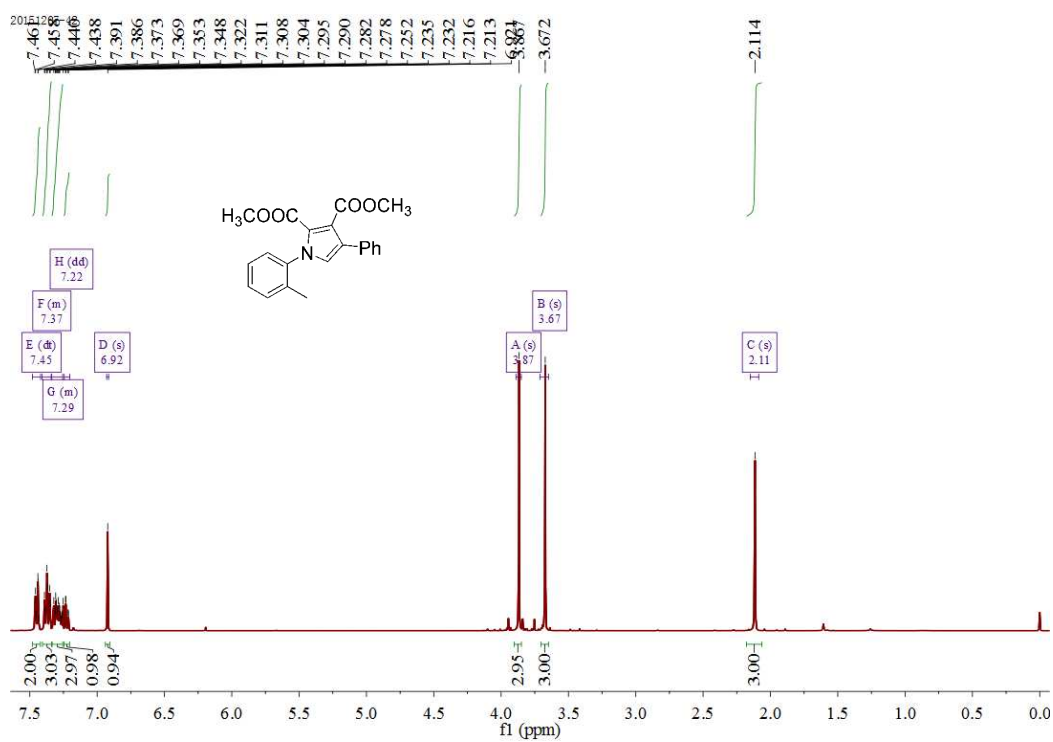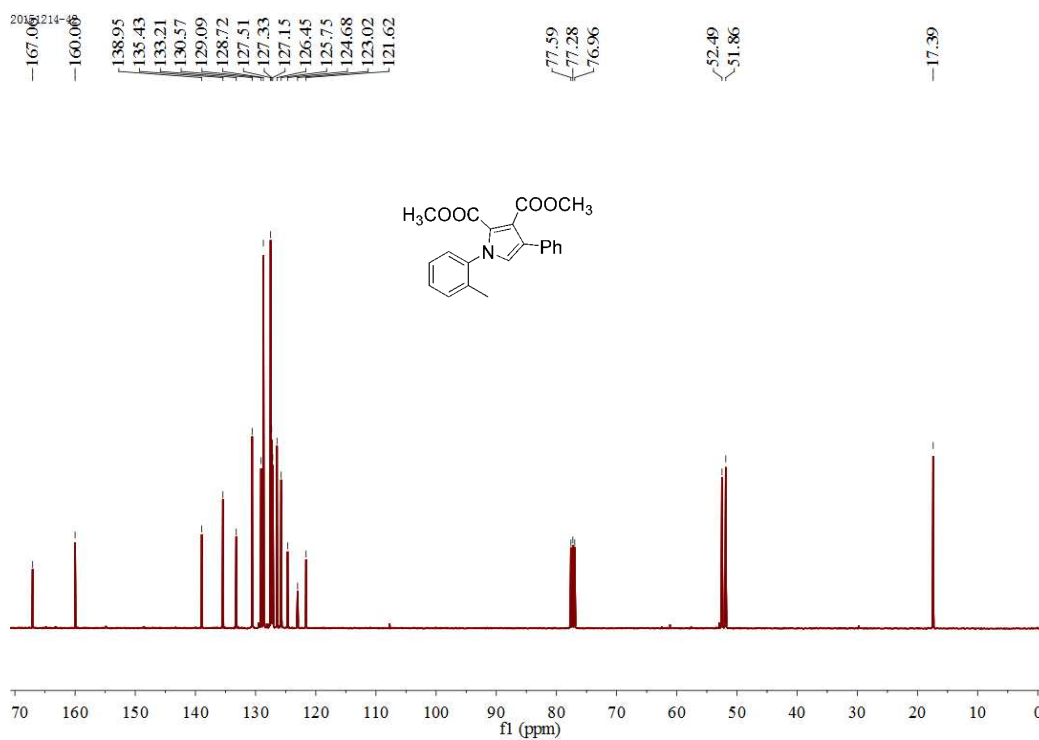

### Product 4f

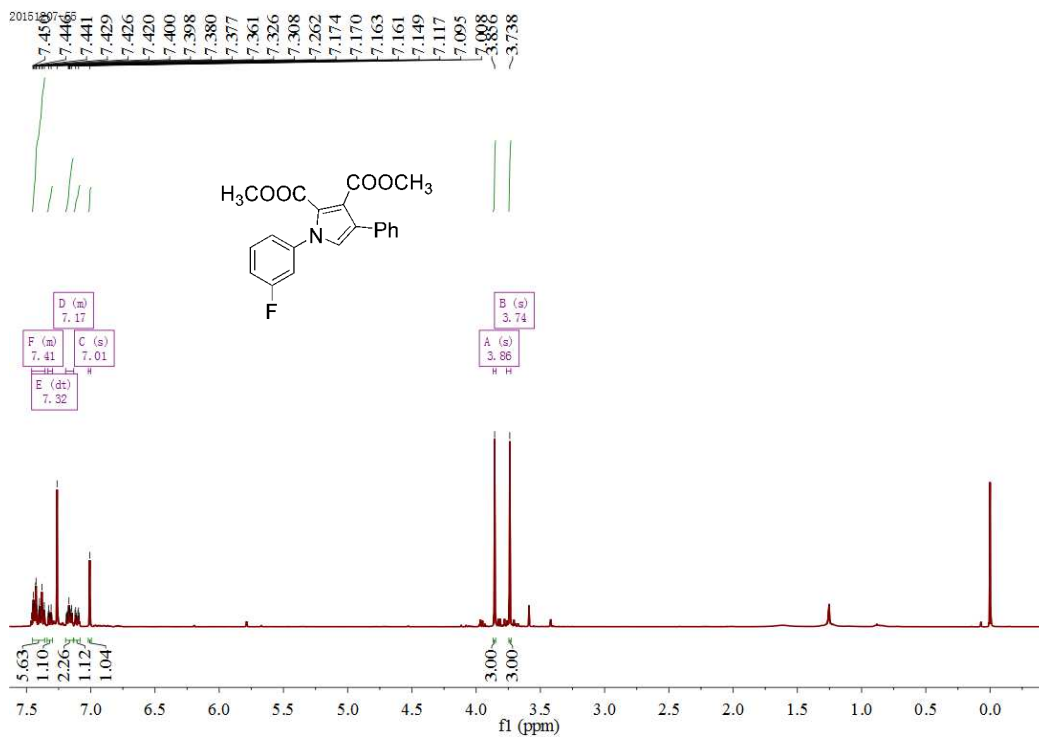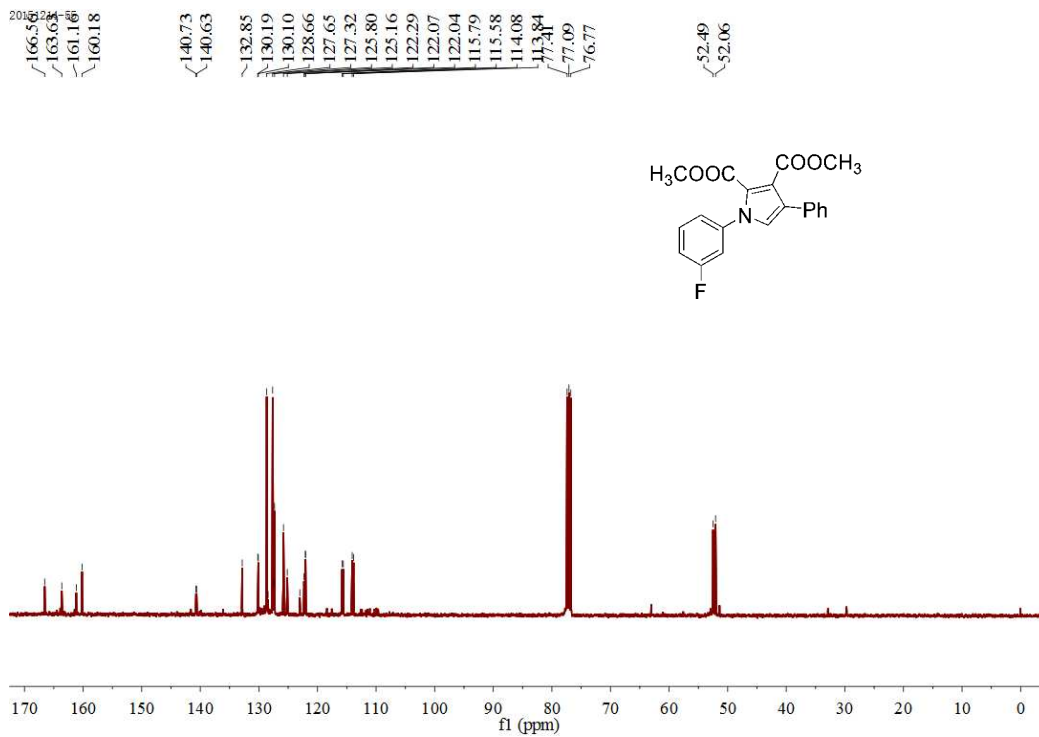

# Product 4g

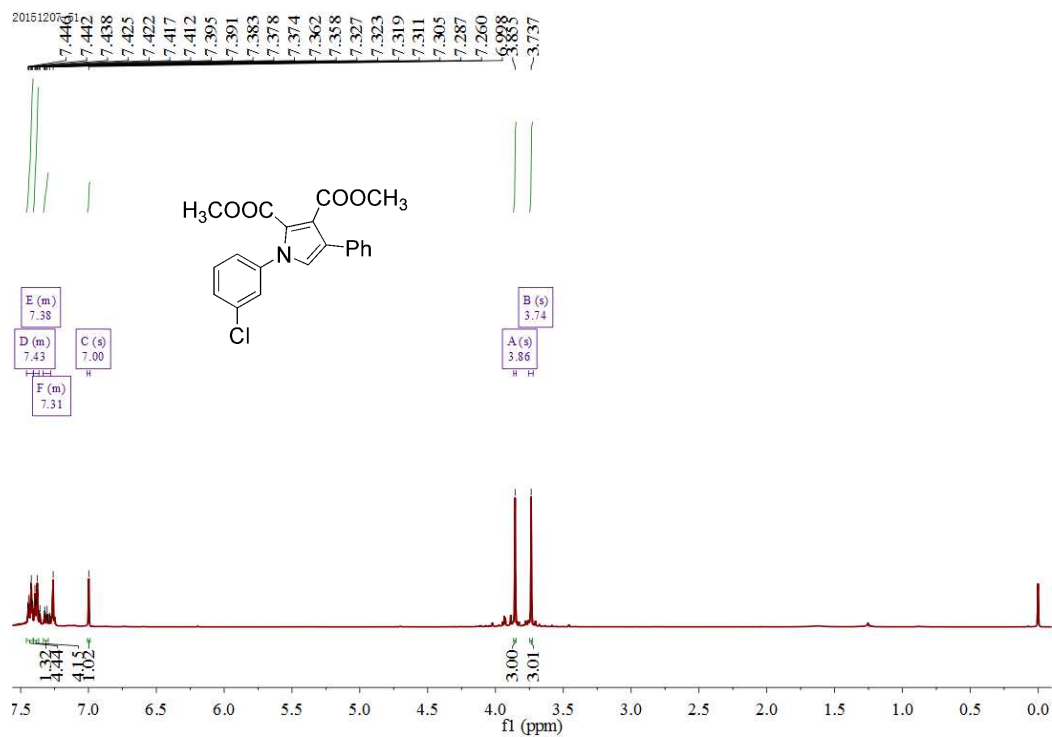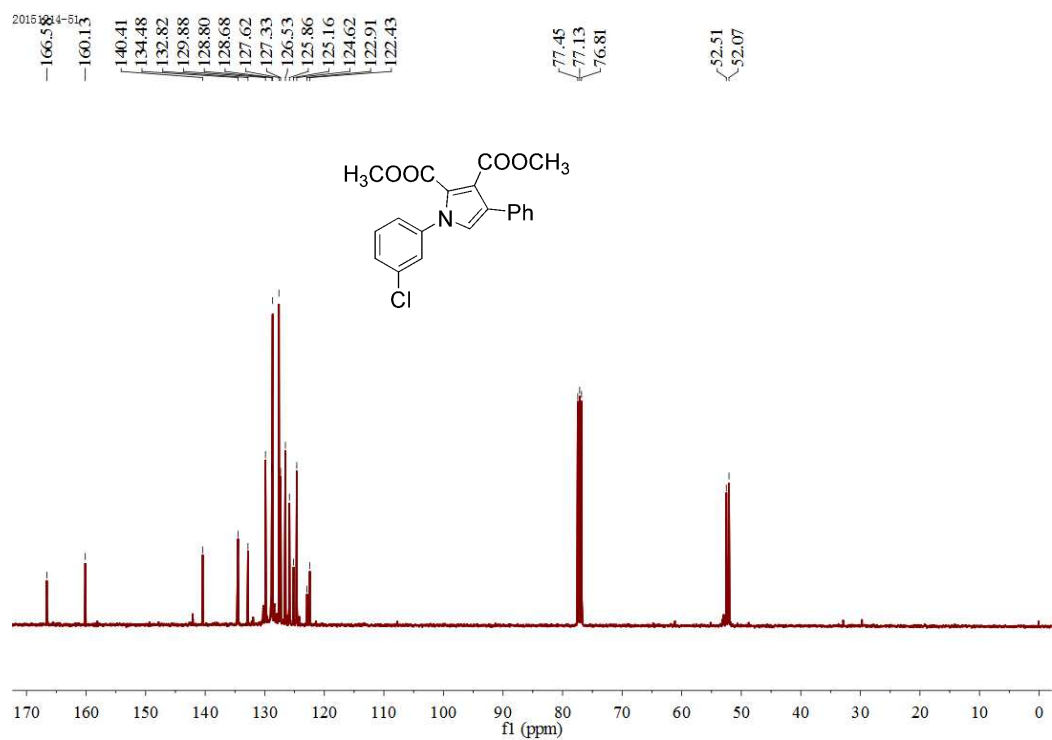

# Product 4h

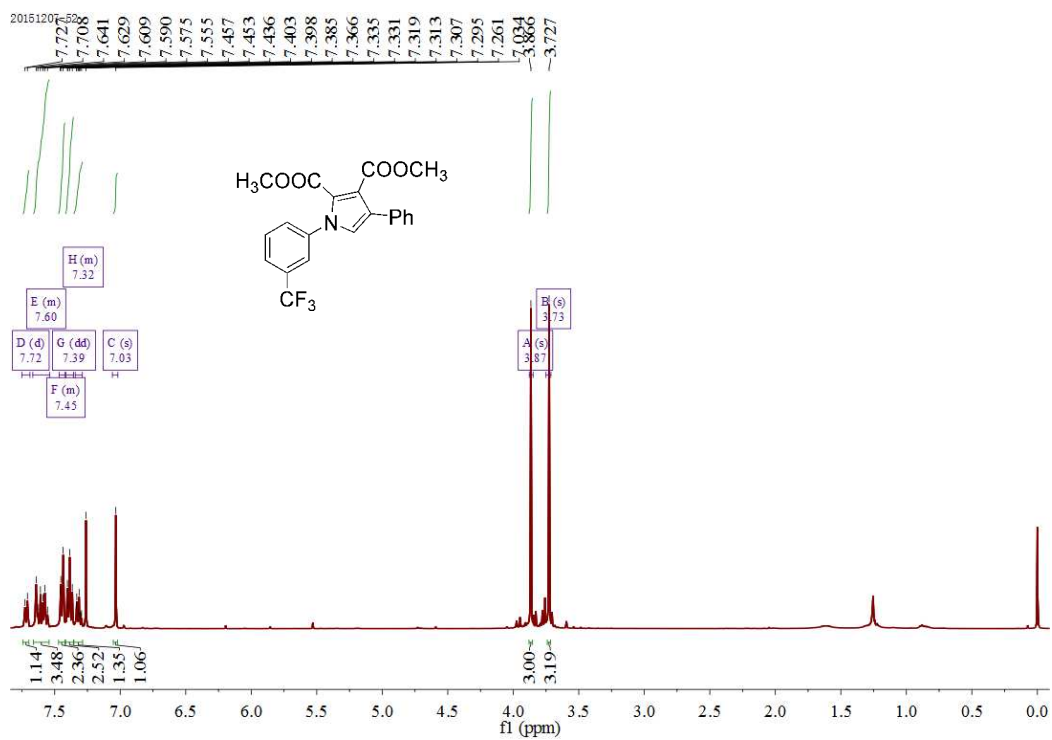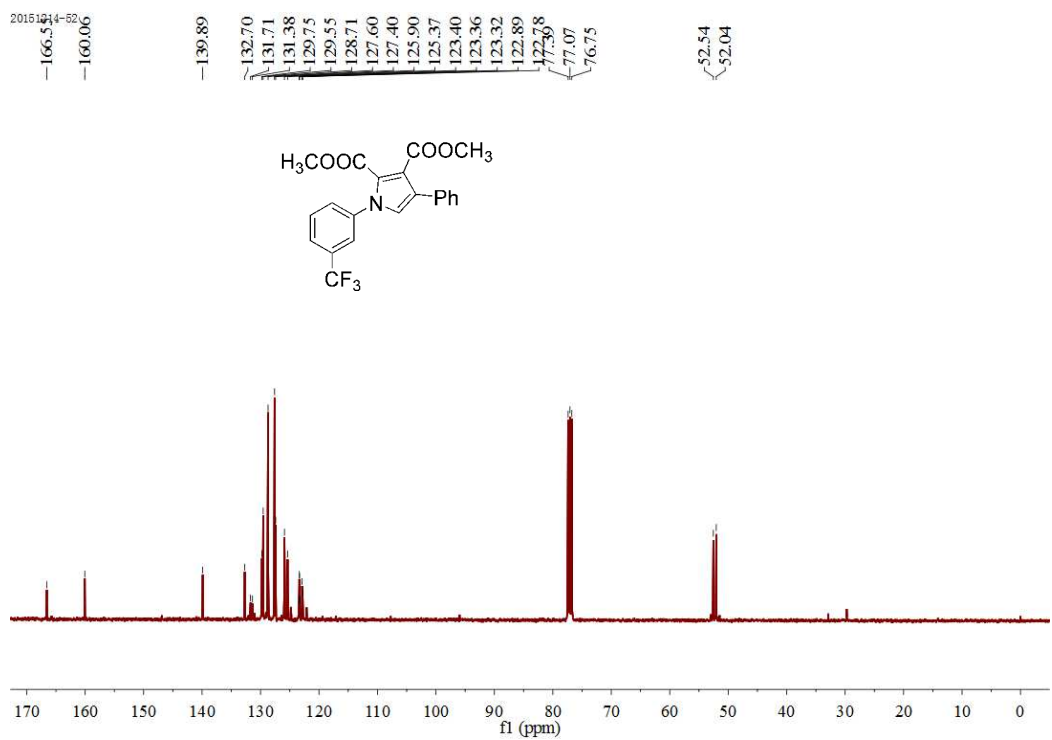



# Product 4i

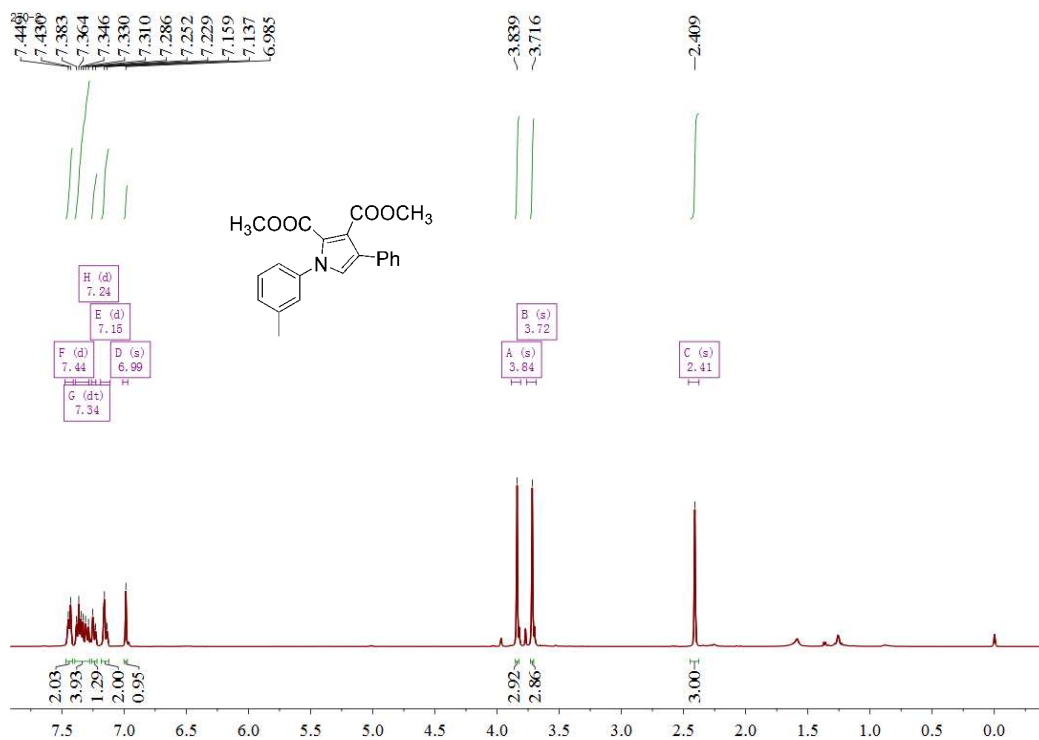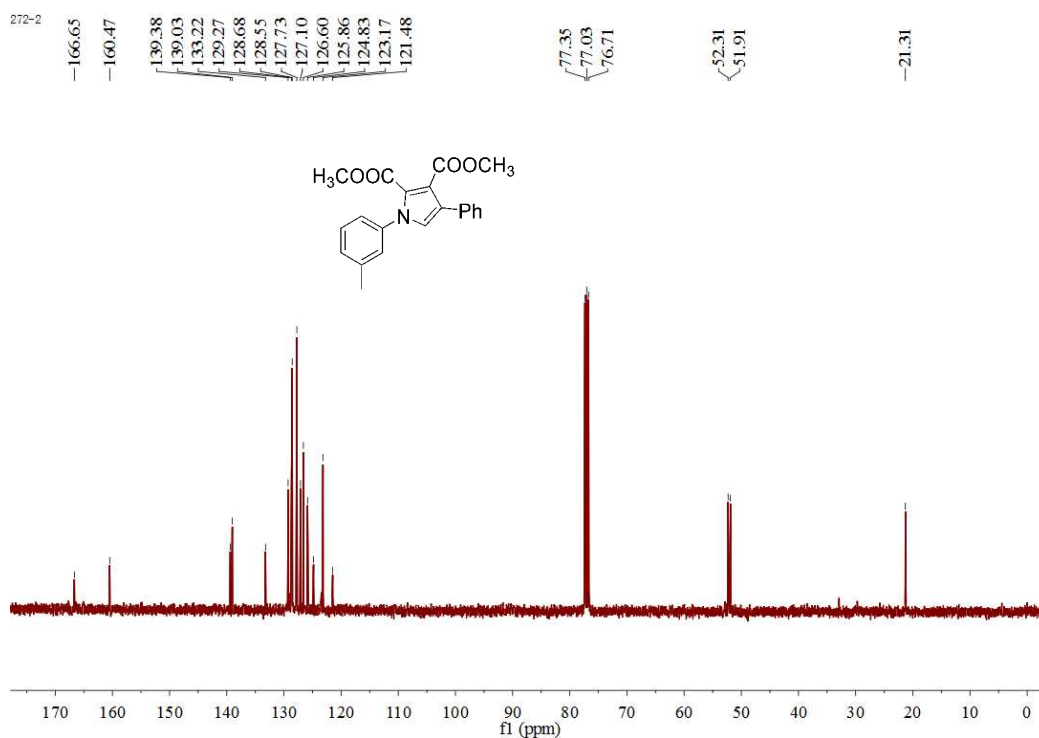

# Product 4j

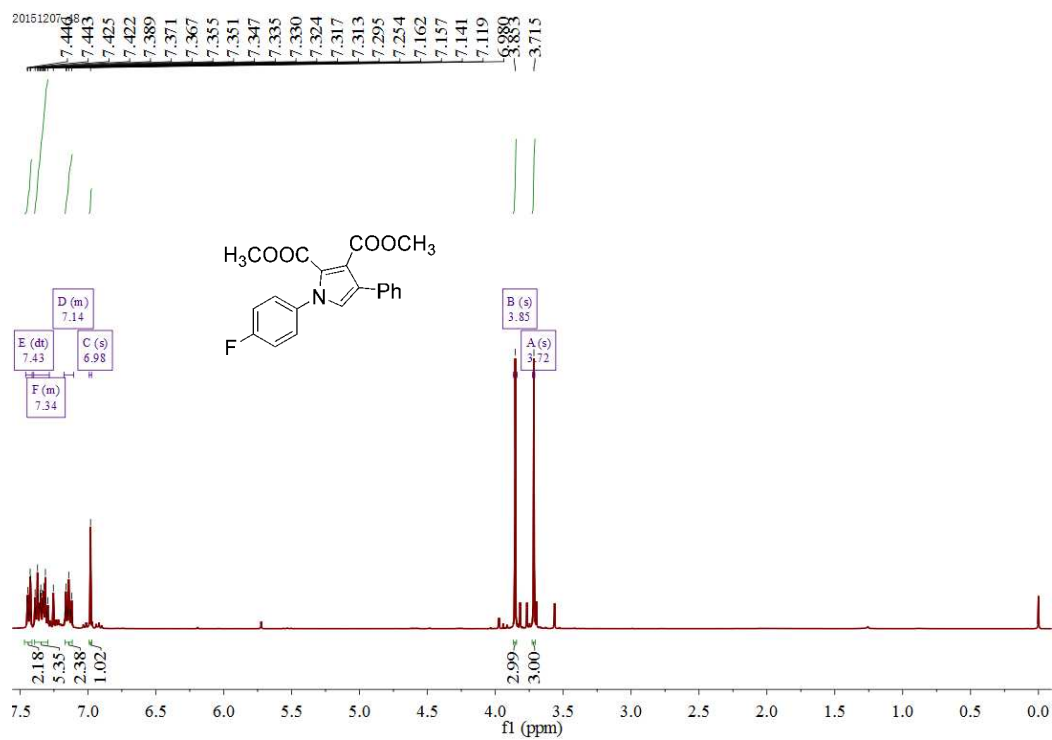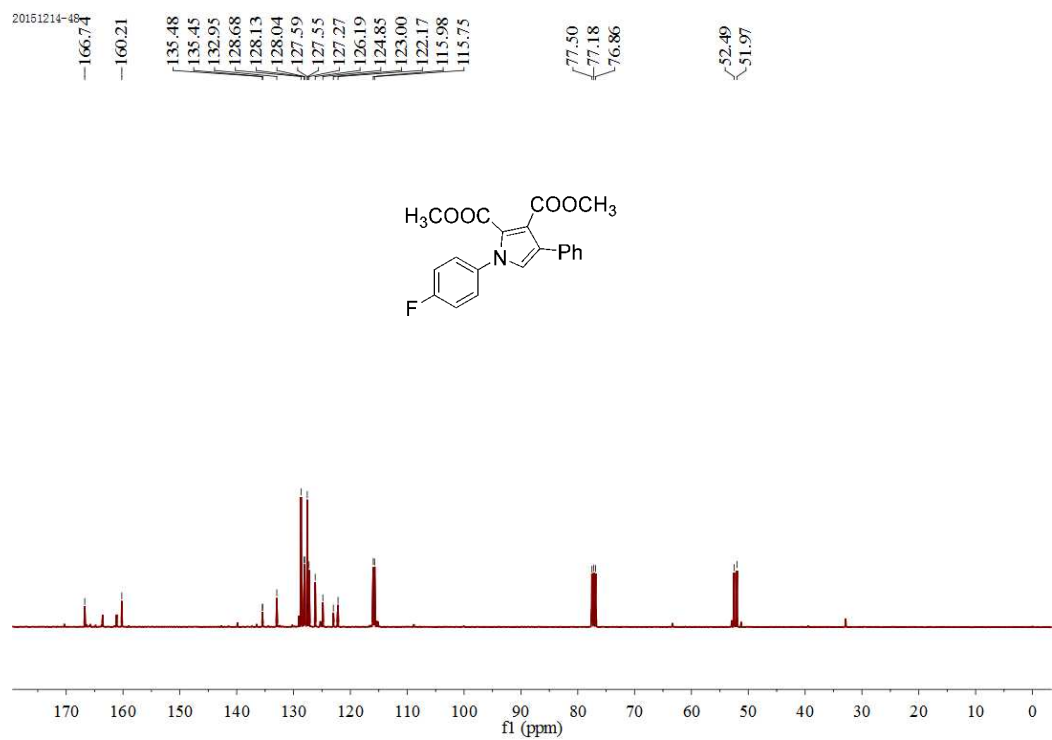

# Product 4k

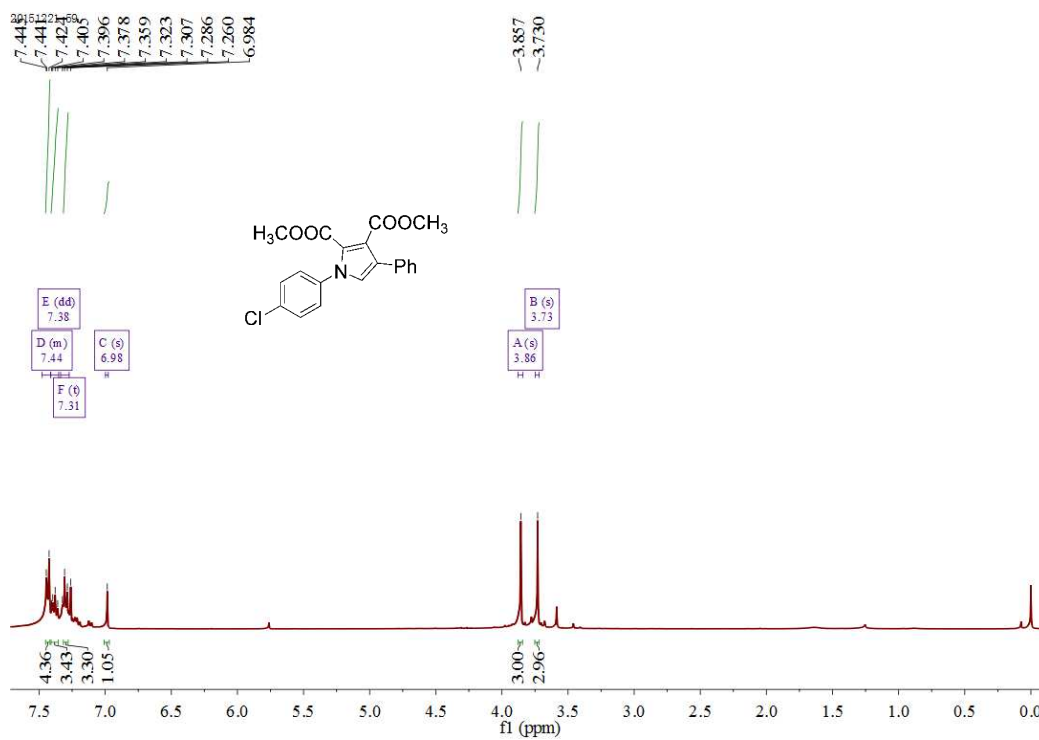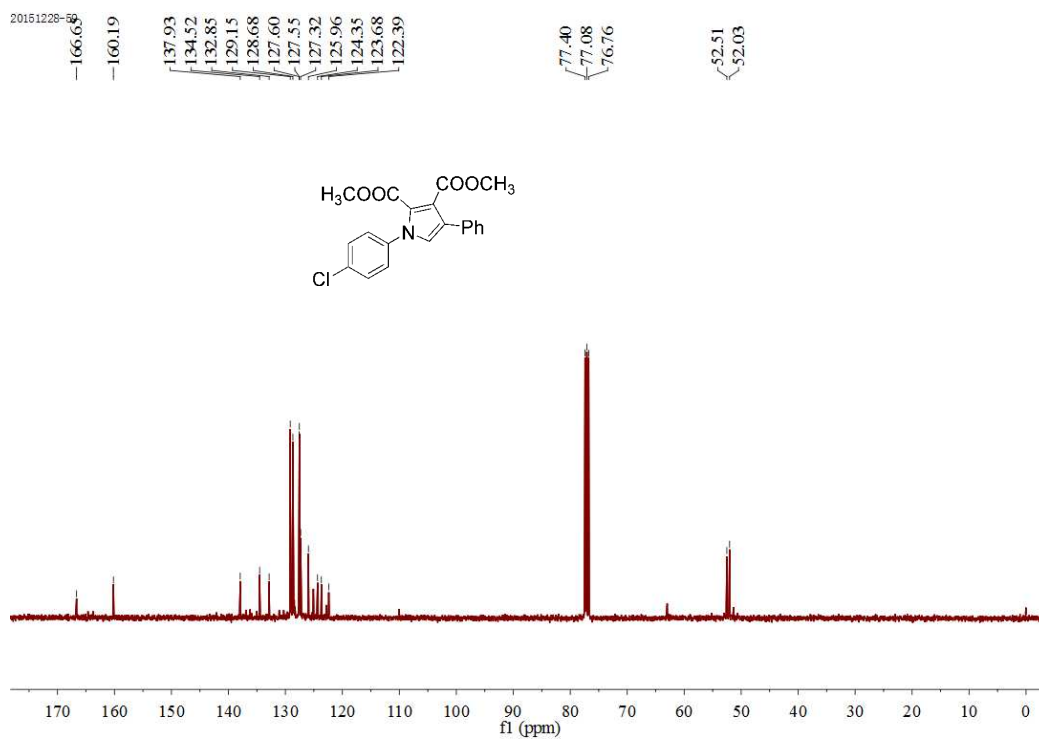

# Product 4l

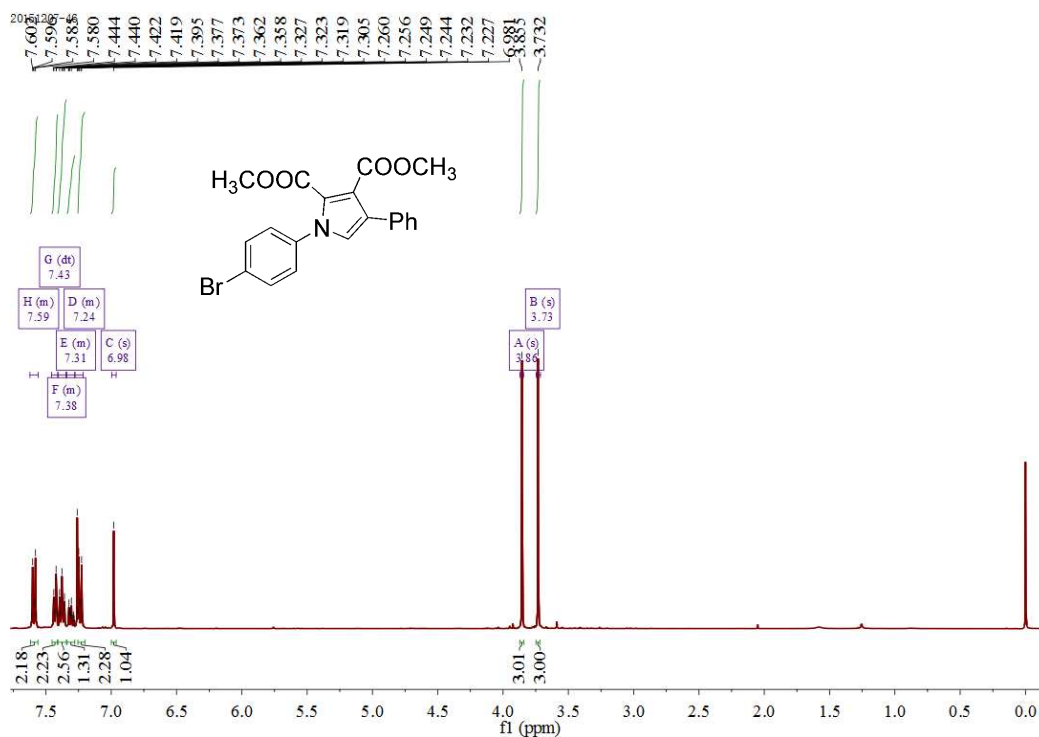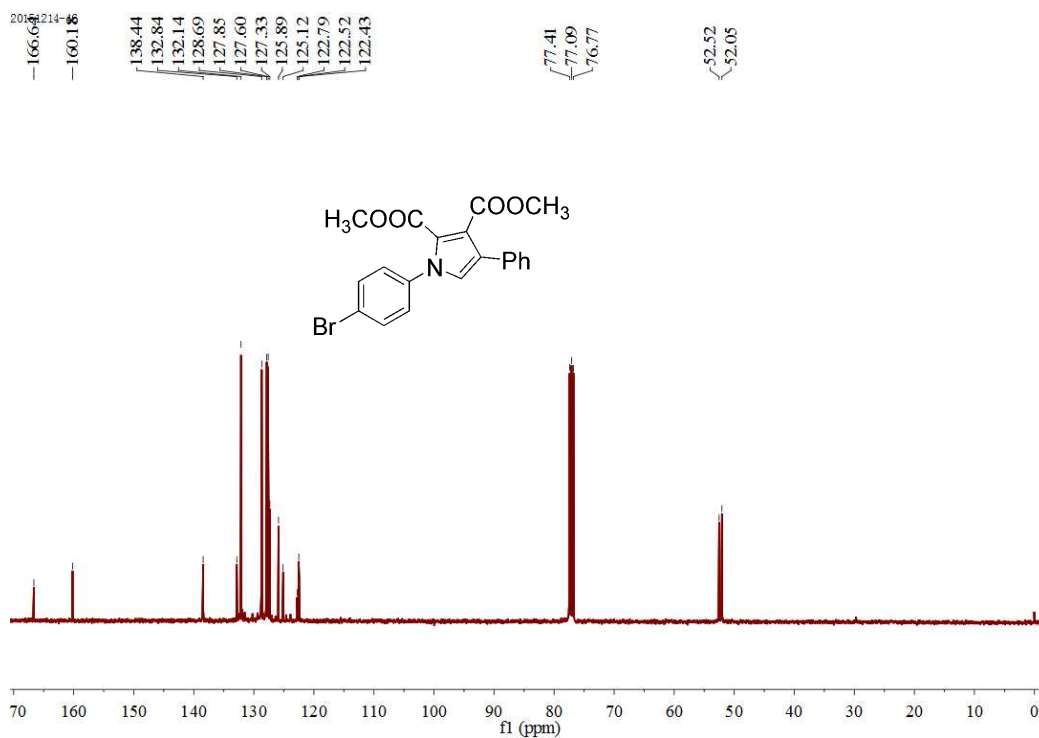

# Product 4m

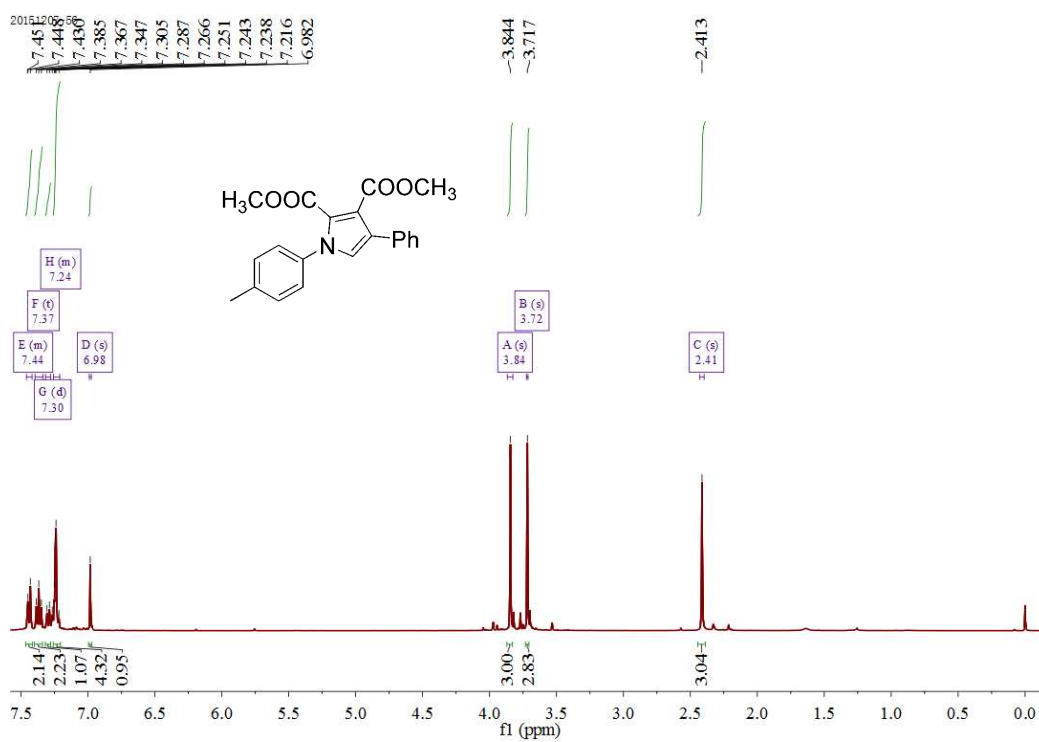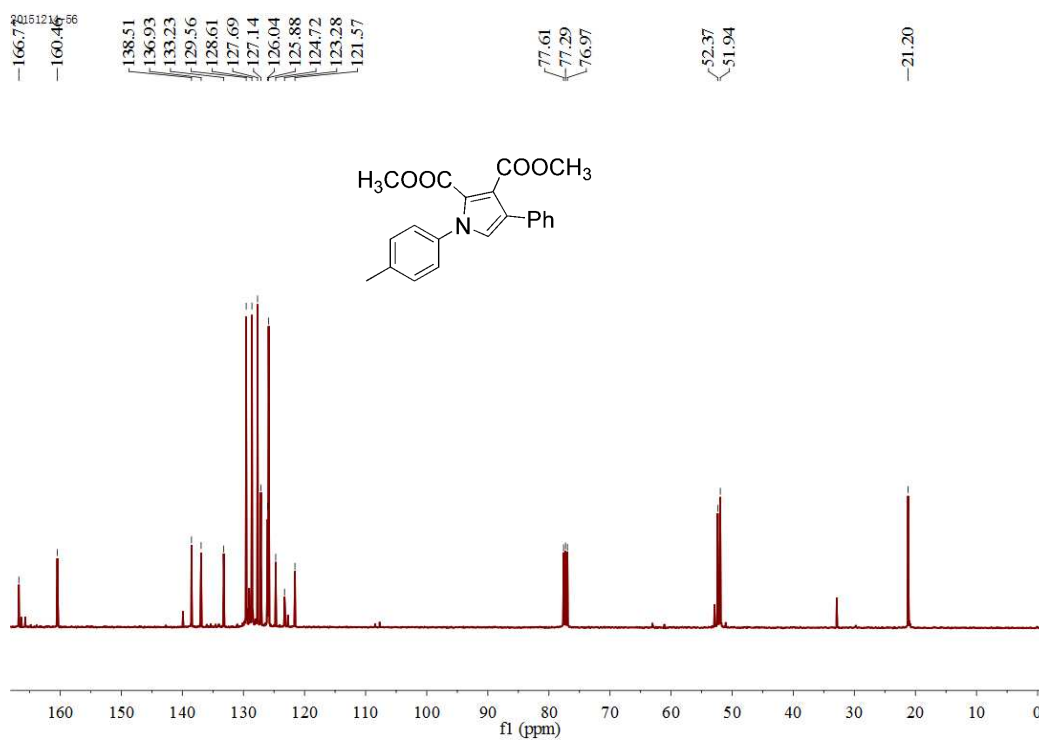

## 38

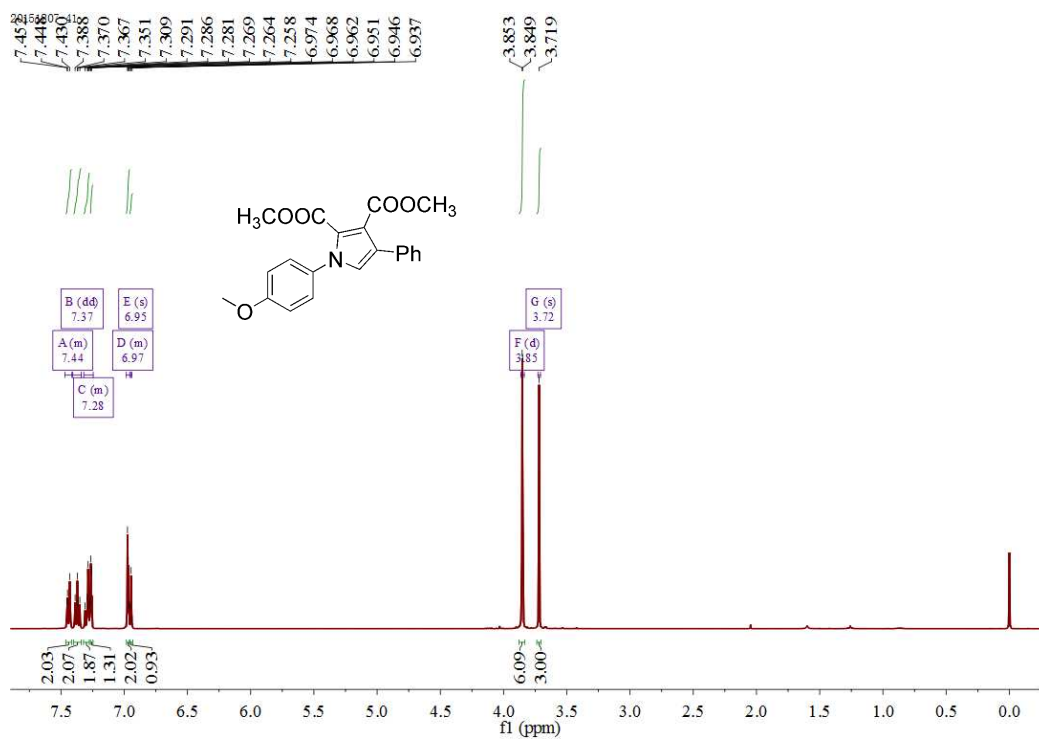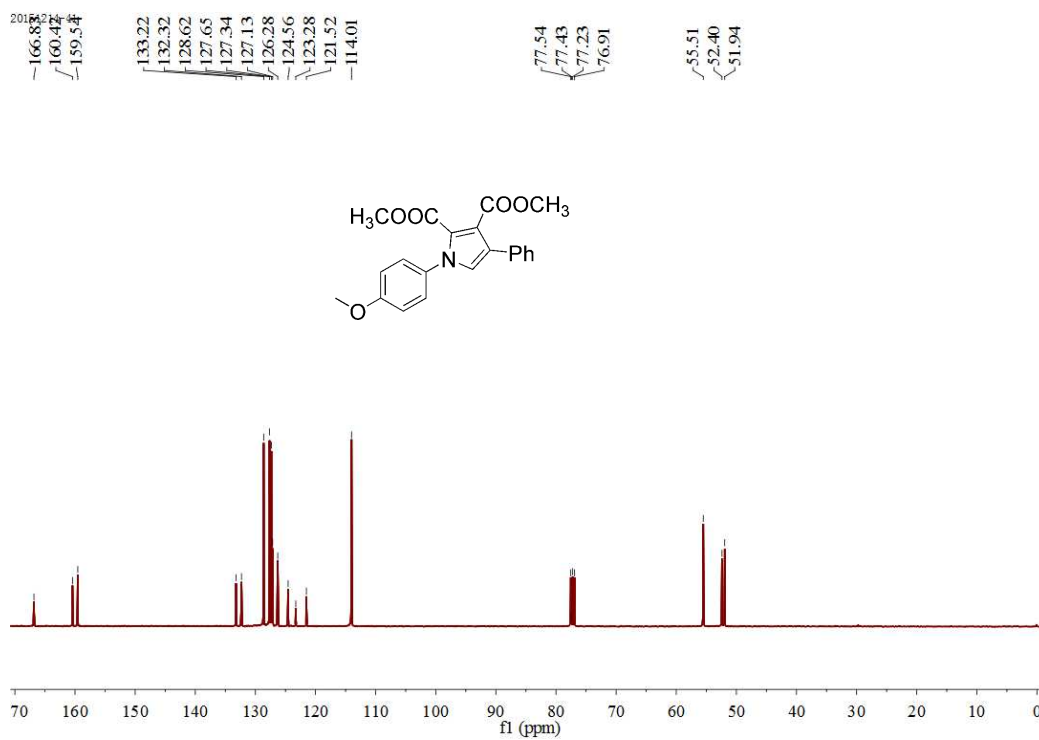

# Product 4o

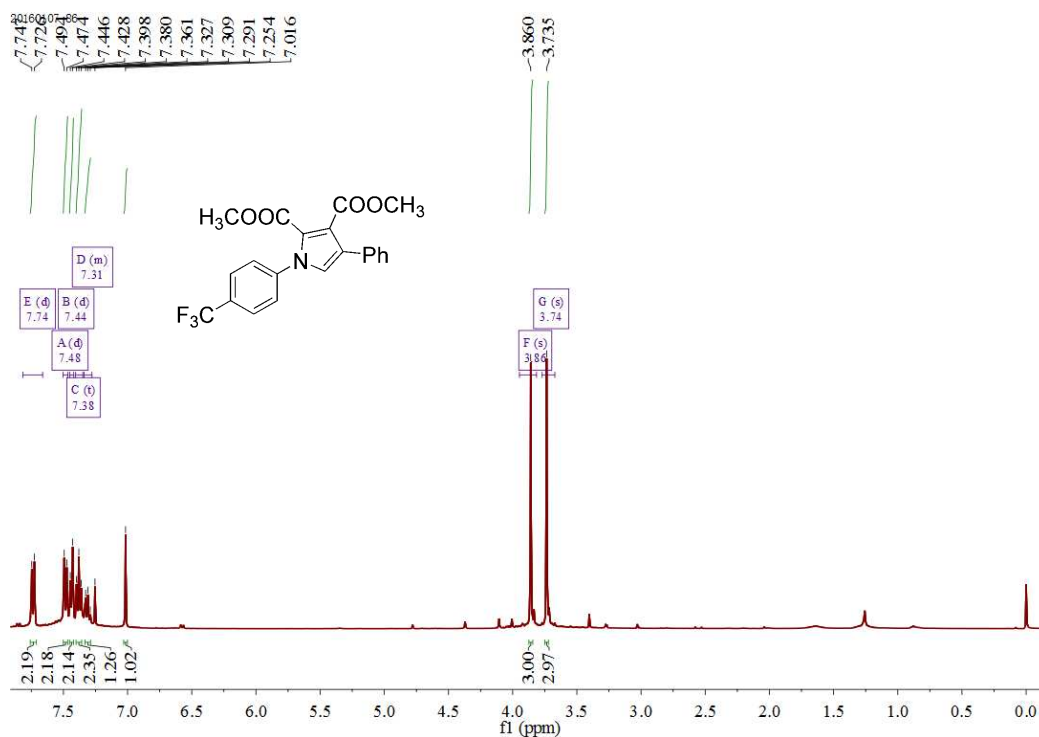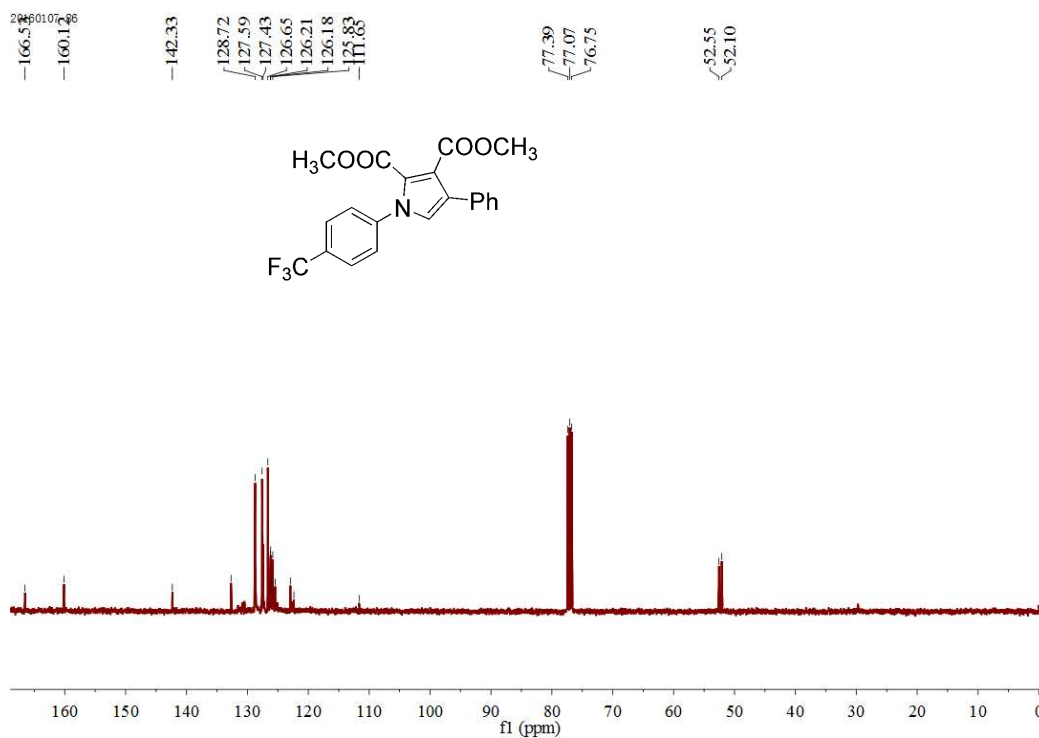

# Product 4p

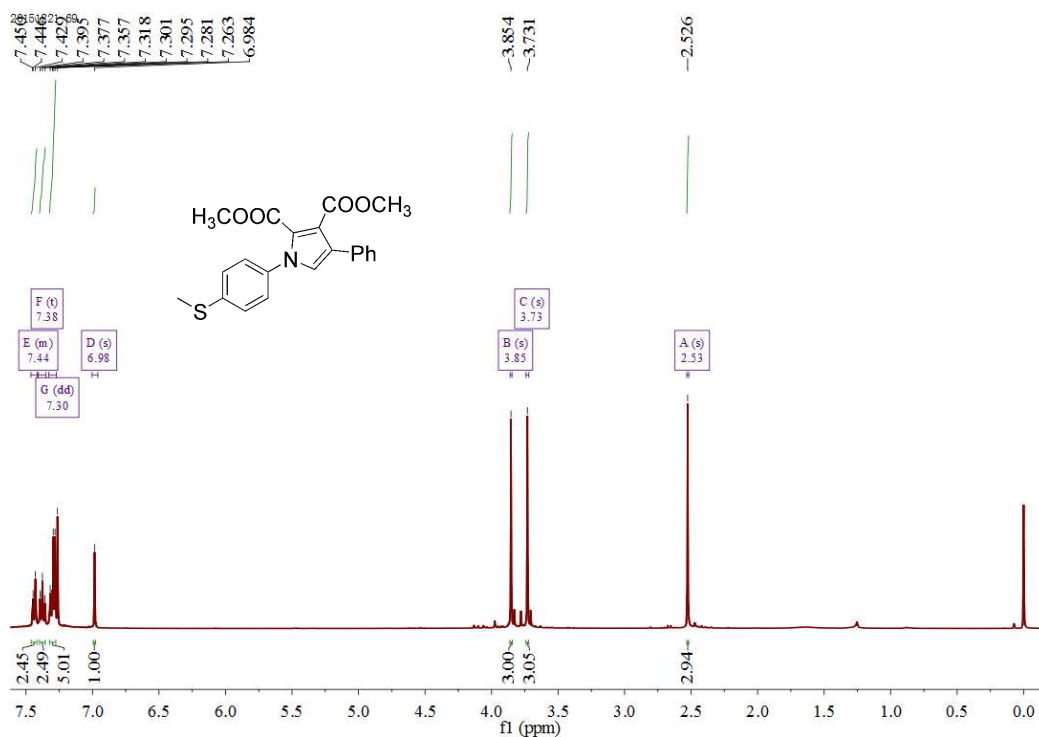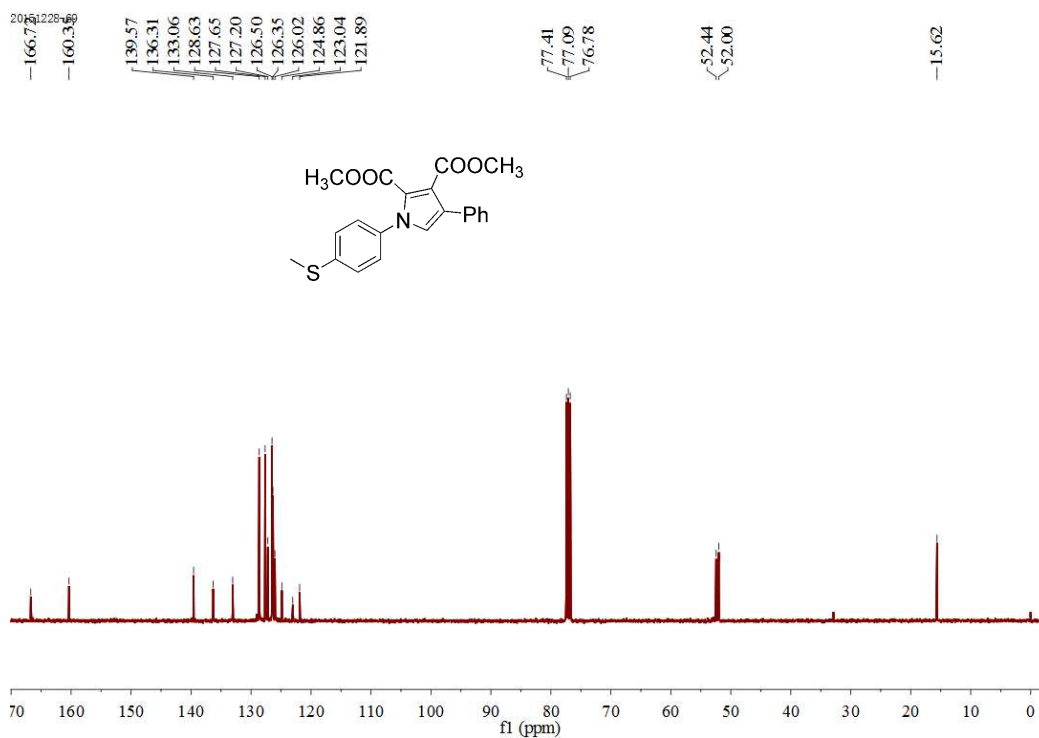



# Product 4q

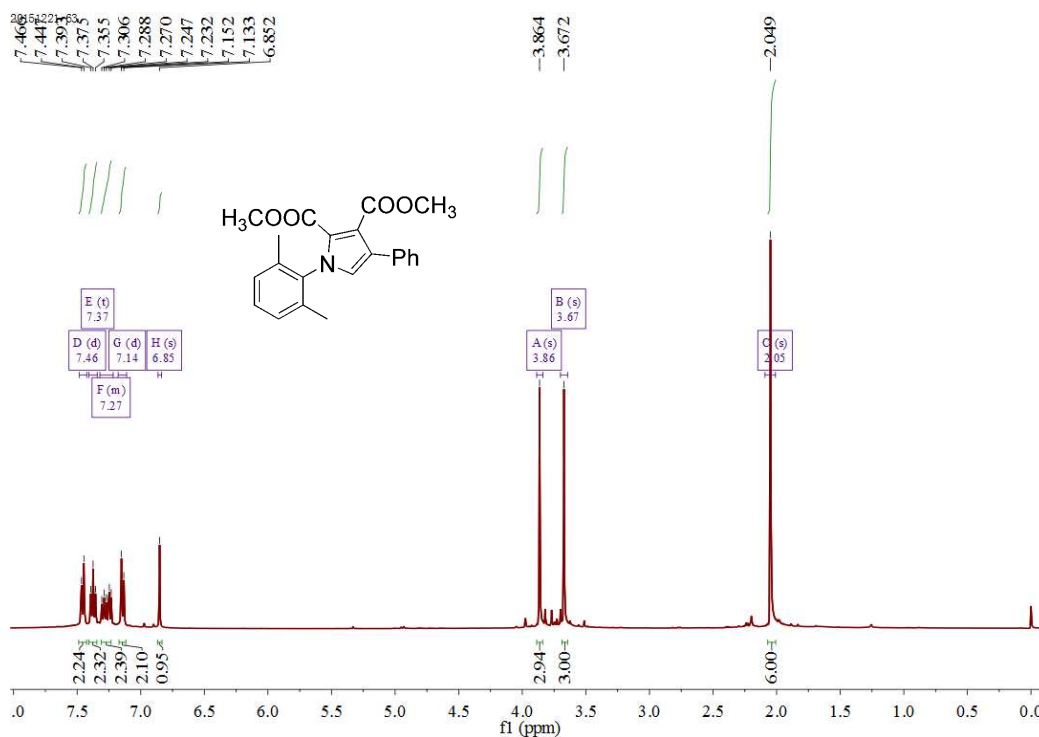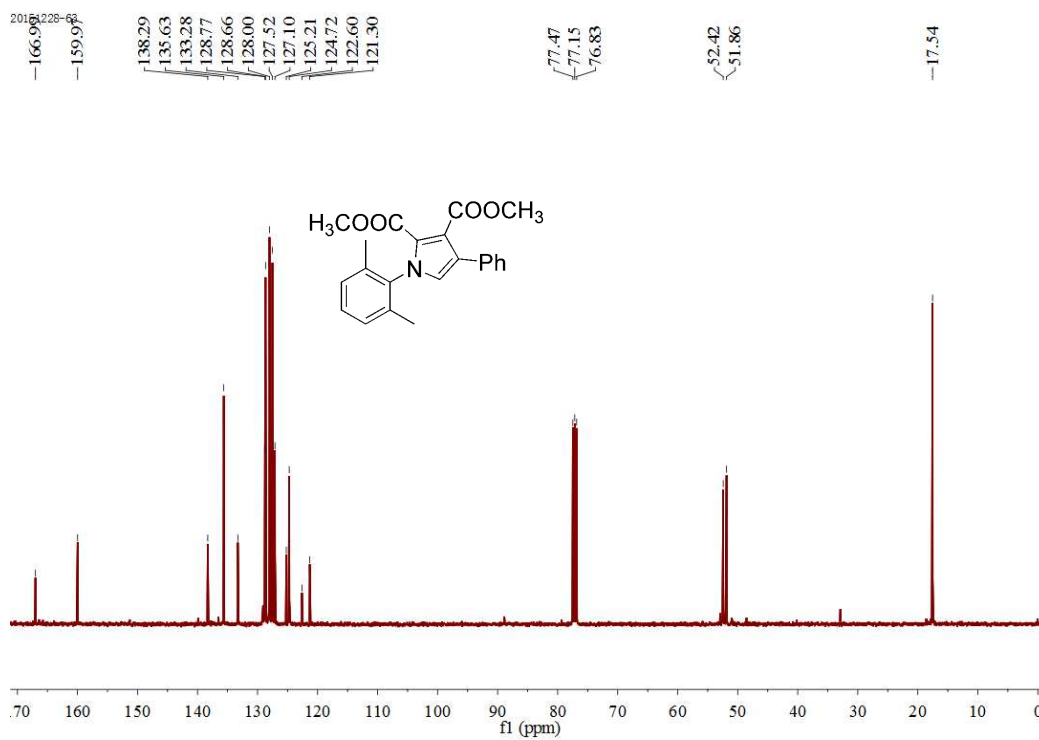

# Product 4r

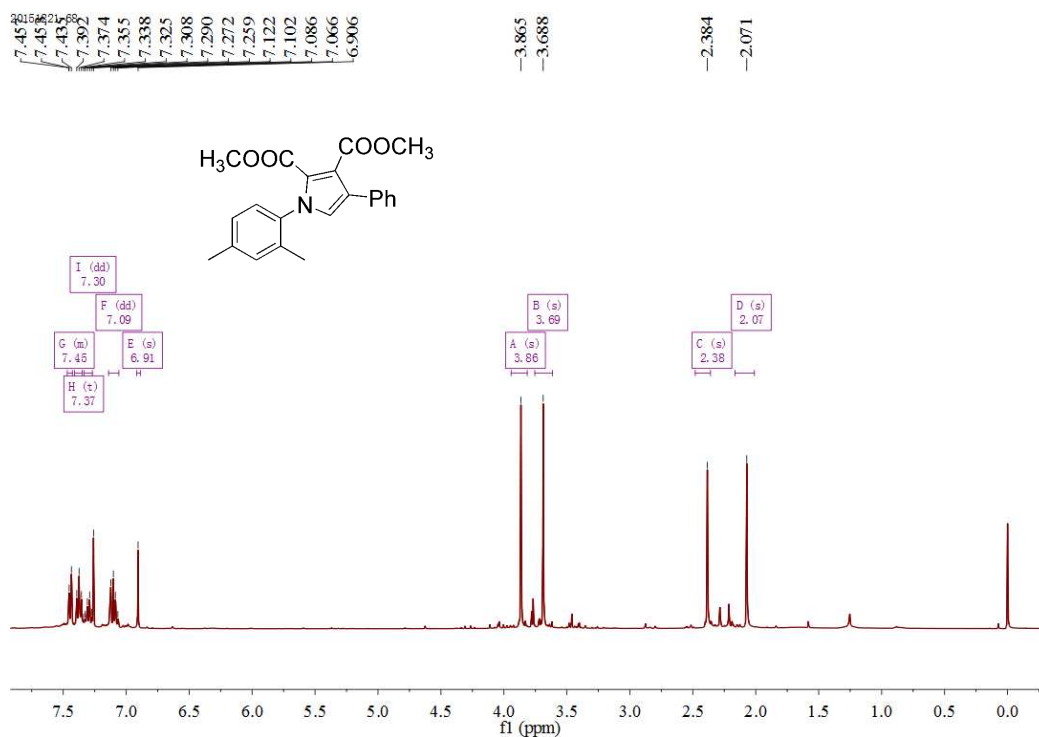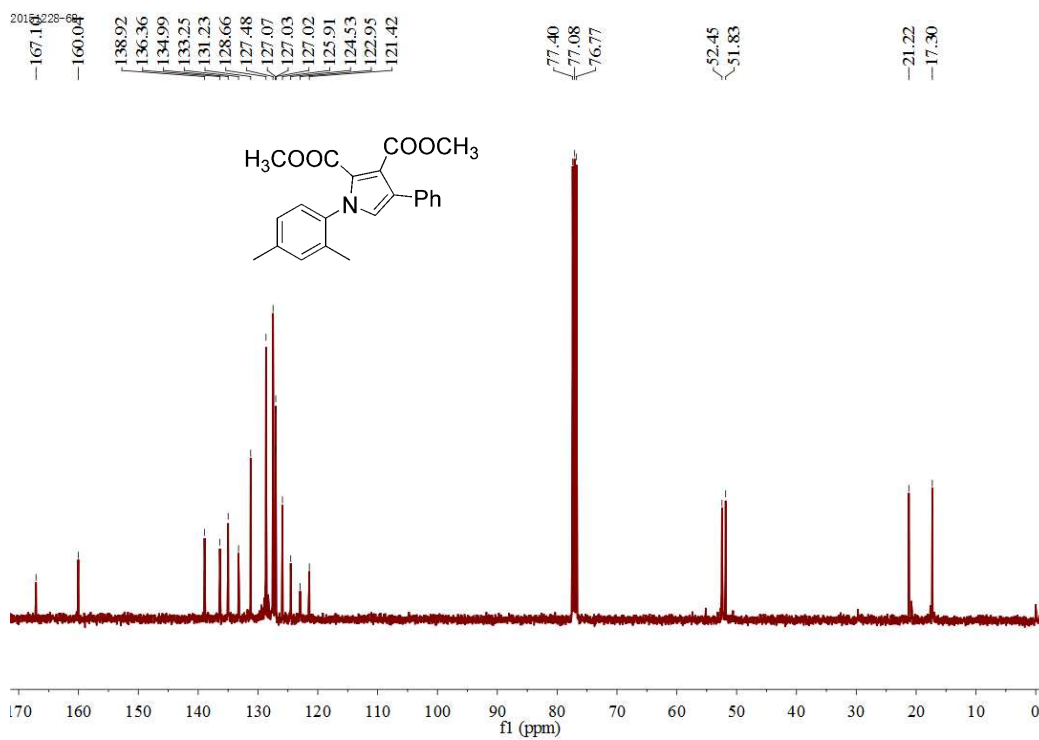

# Product 4s

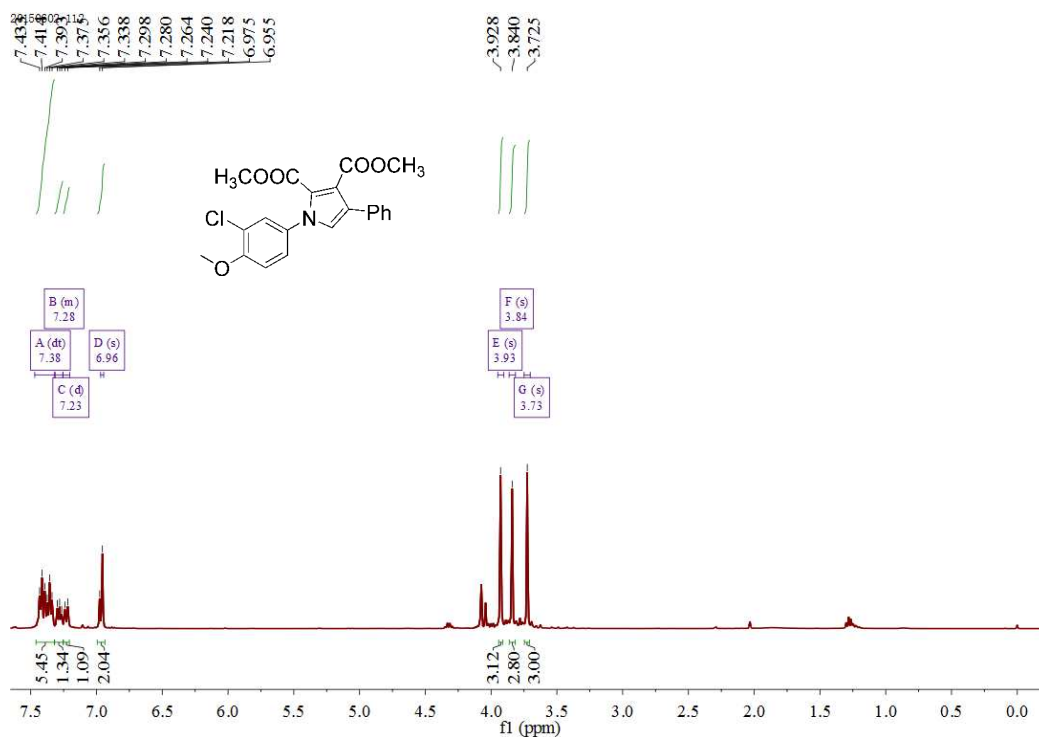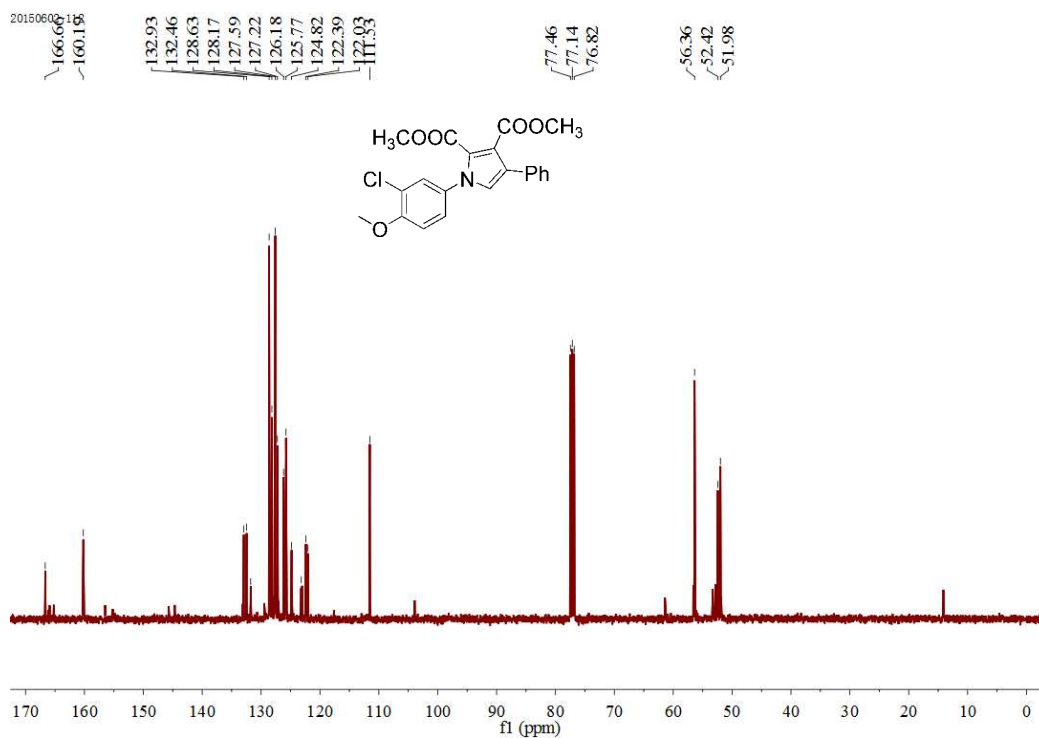

# Product 4t

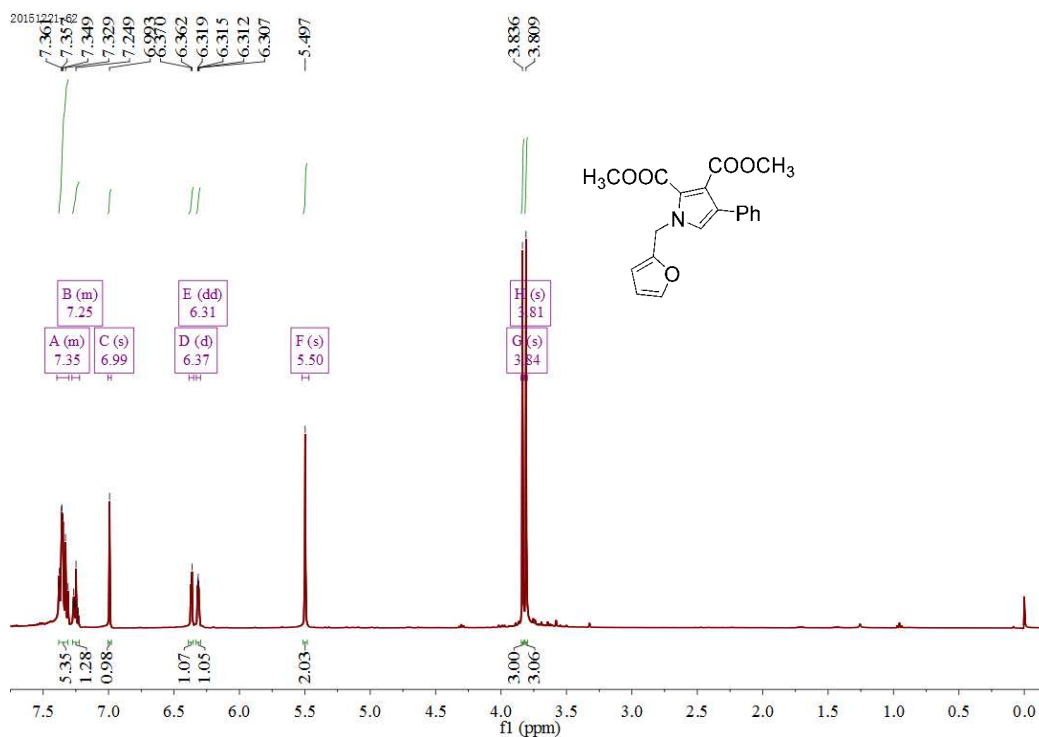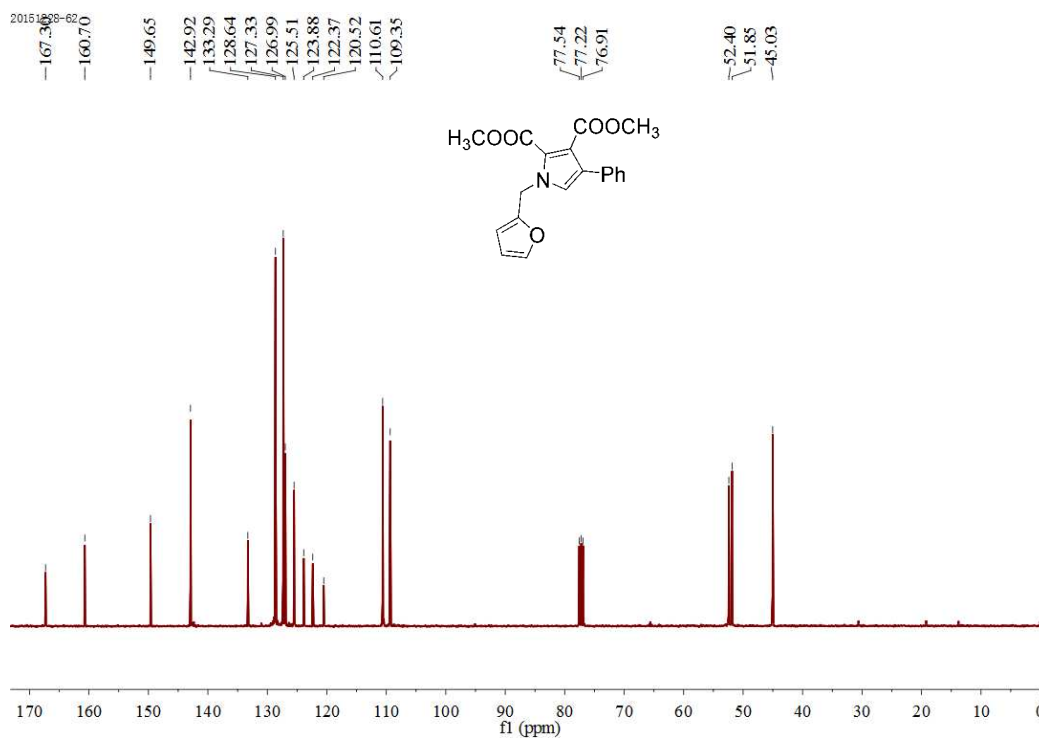

# Product 4u

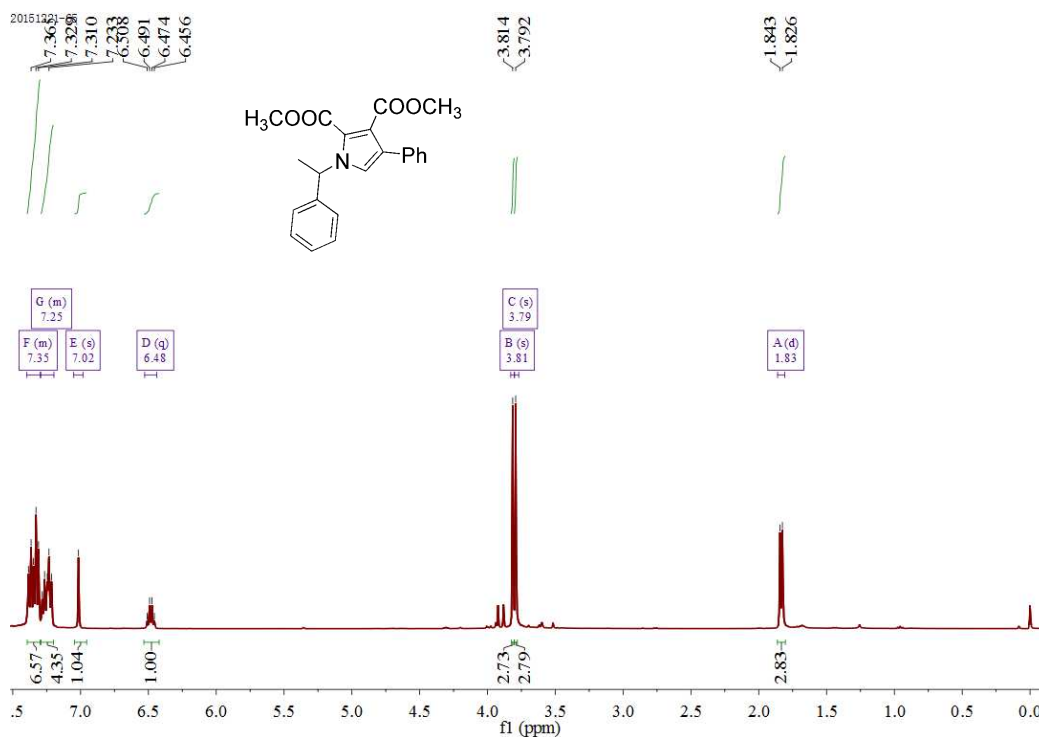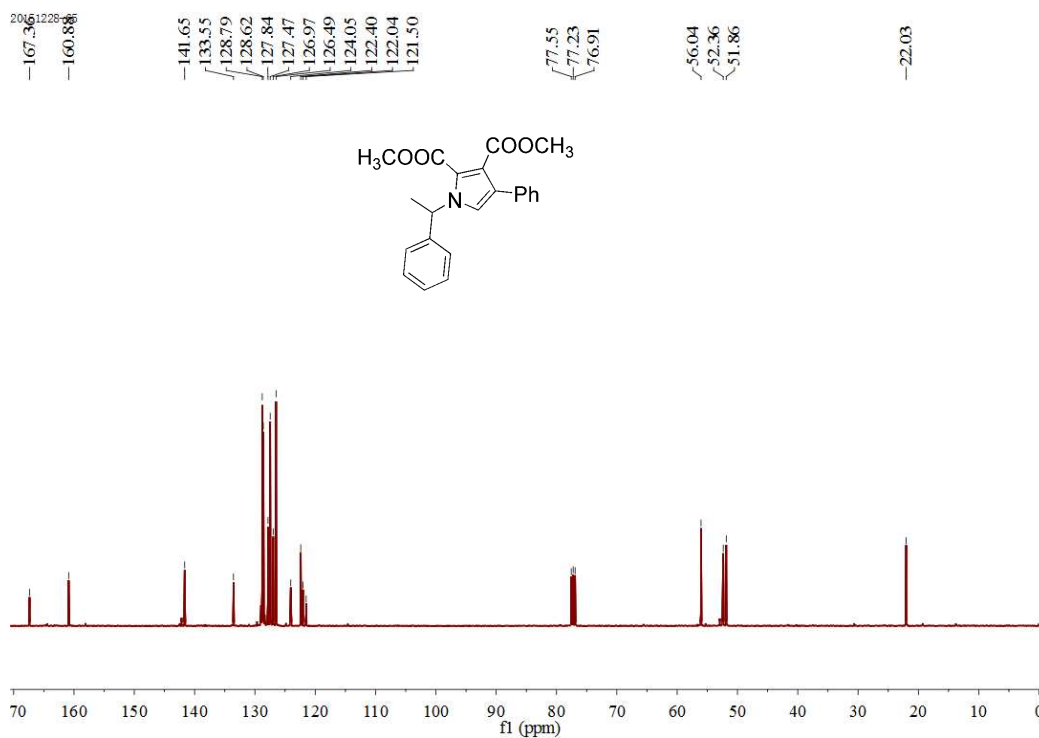

# Product 4v

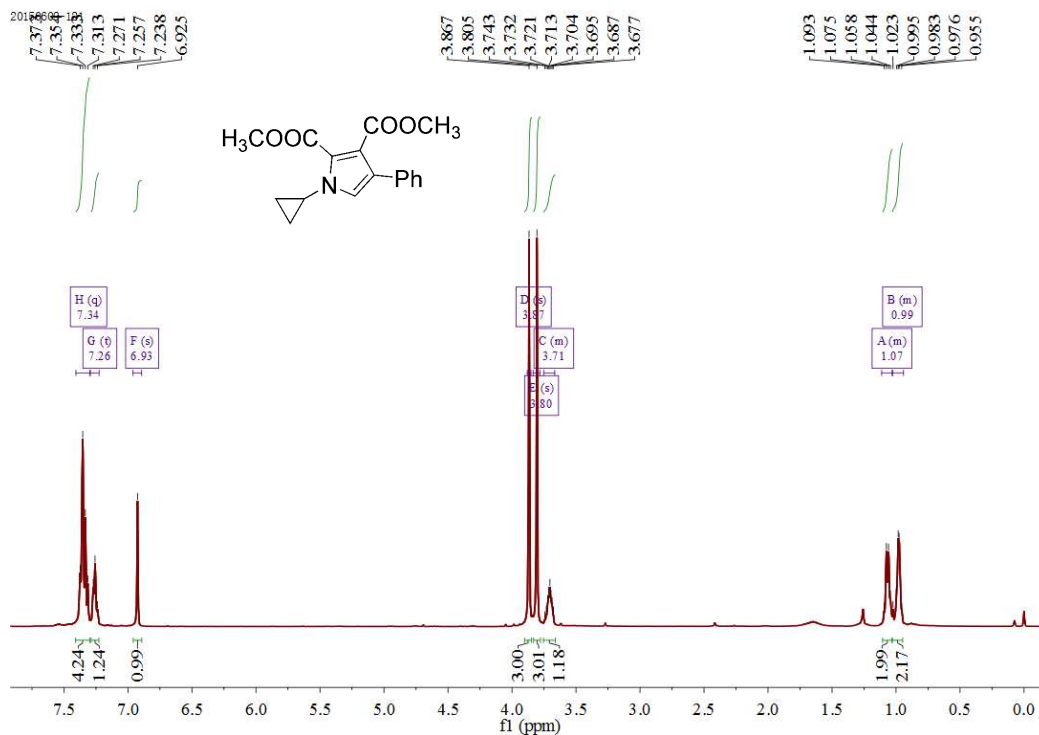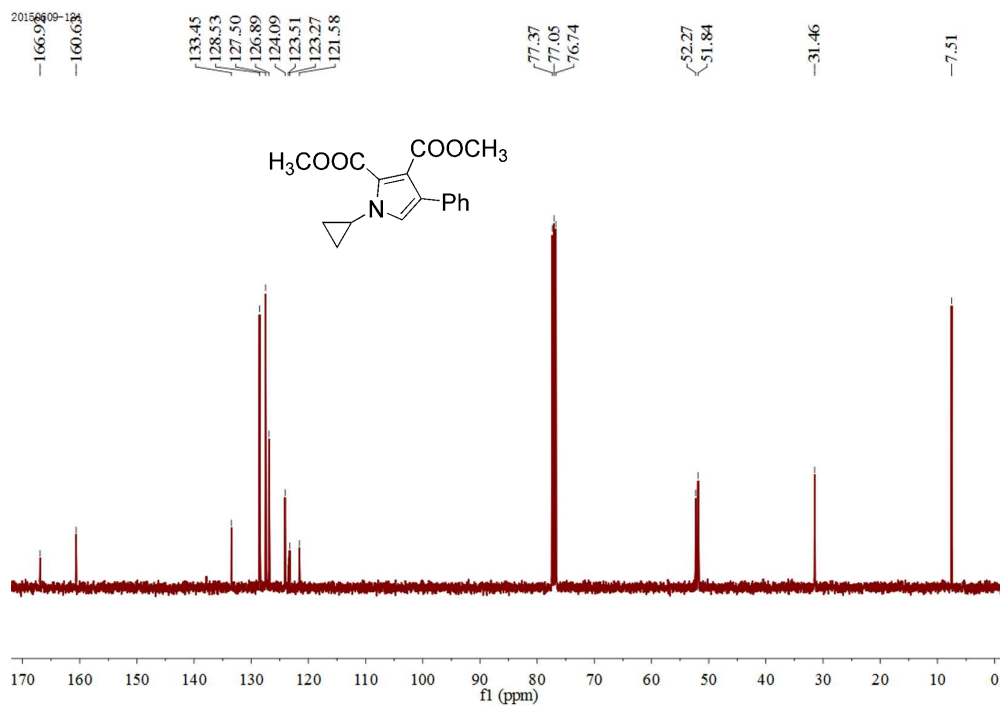

# Product 4w

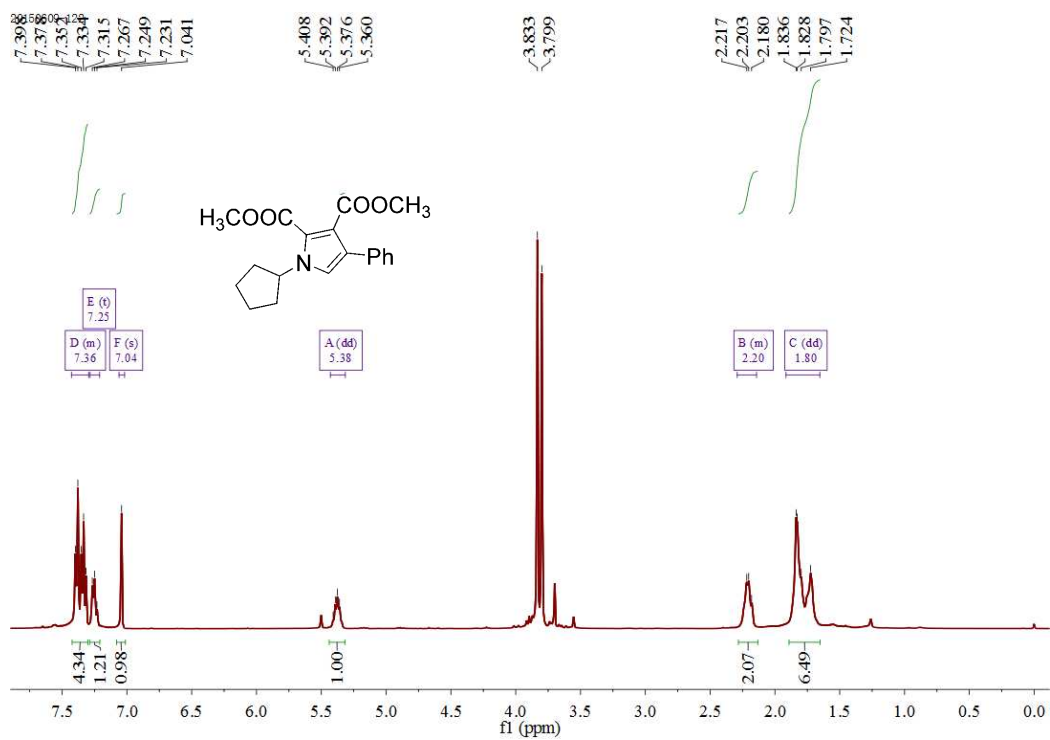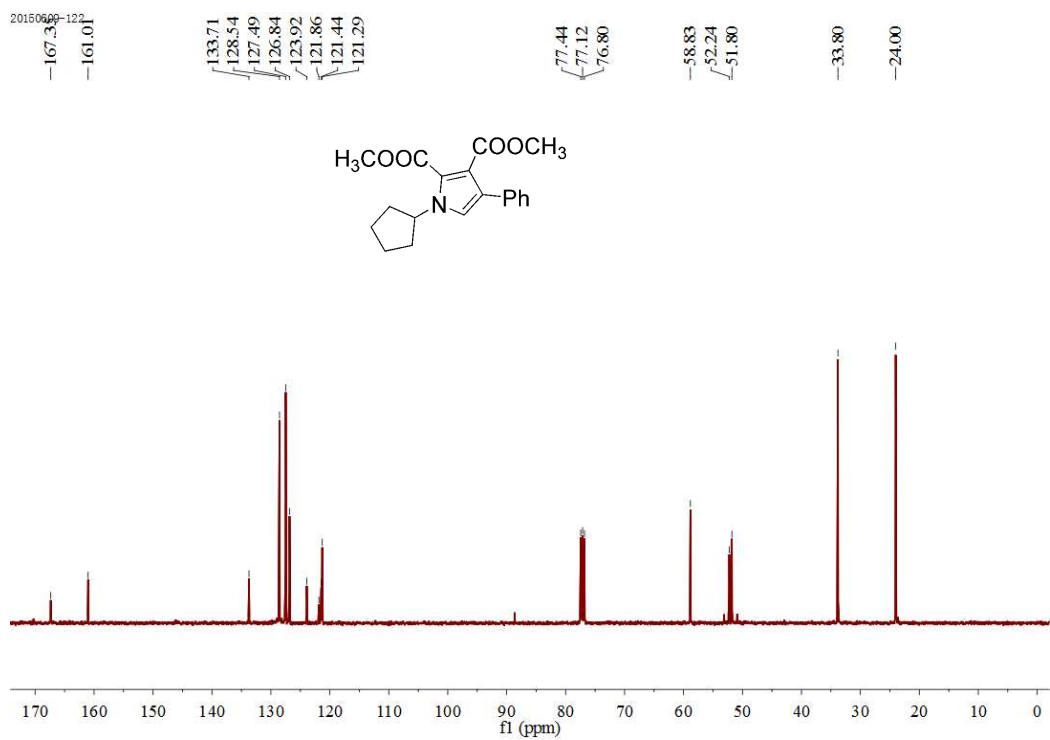

# Product 4x

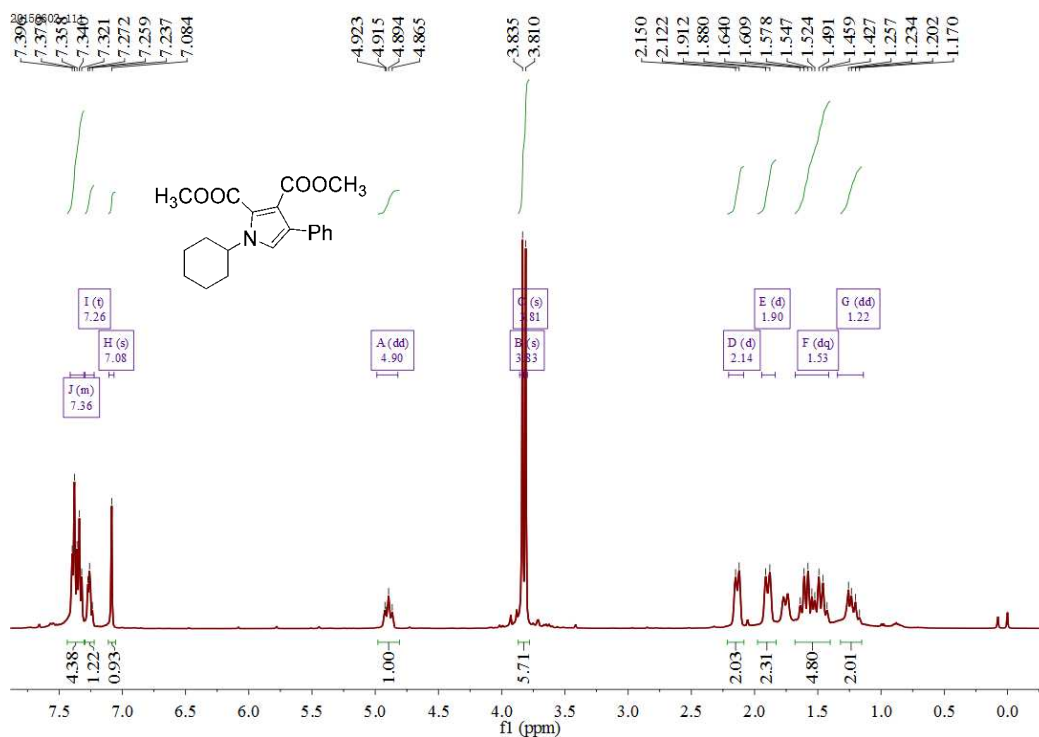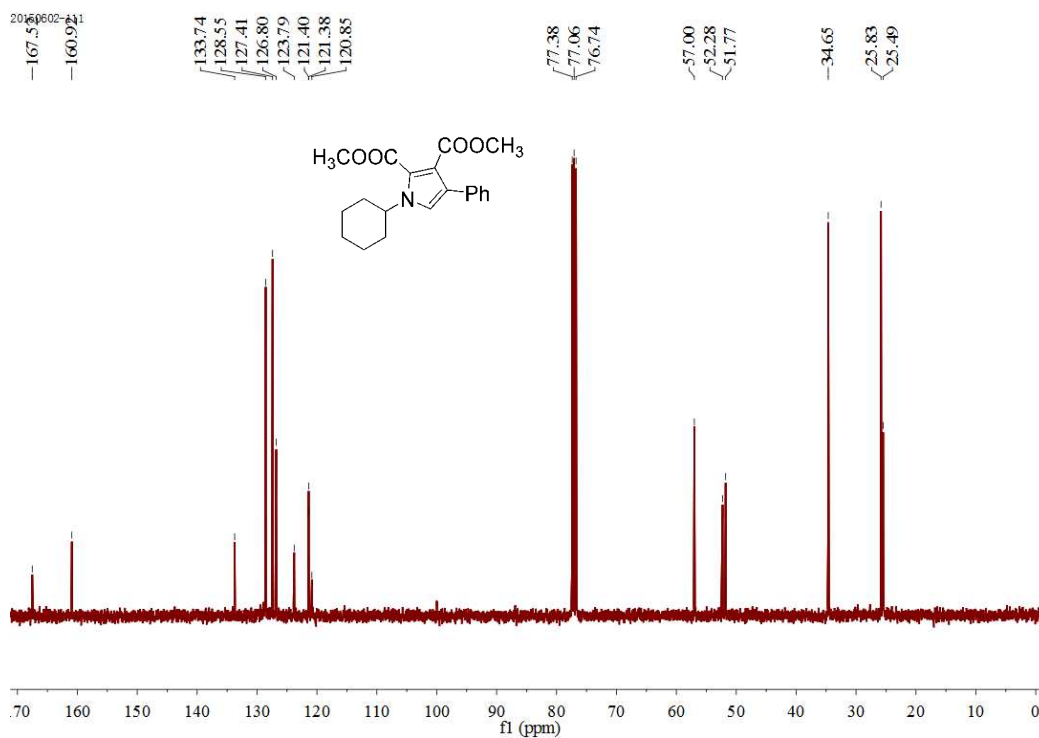



# Product 4y

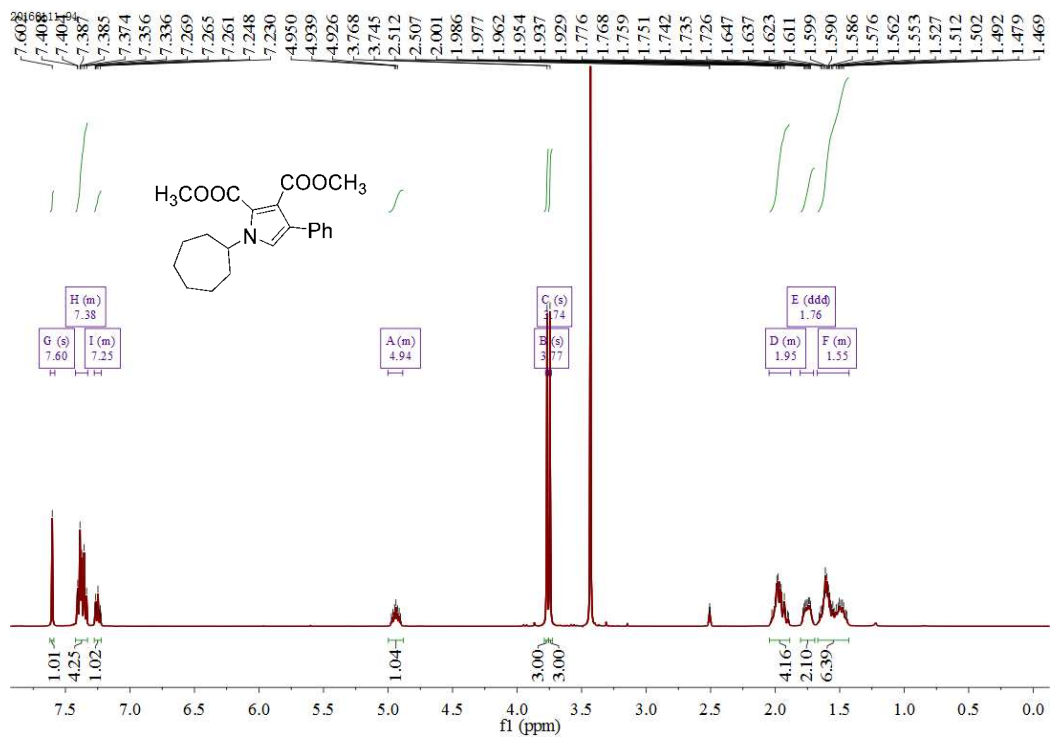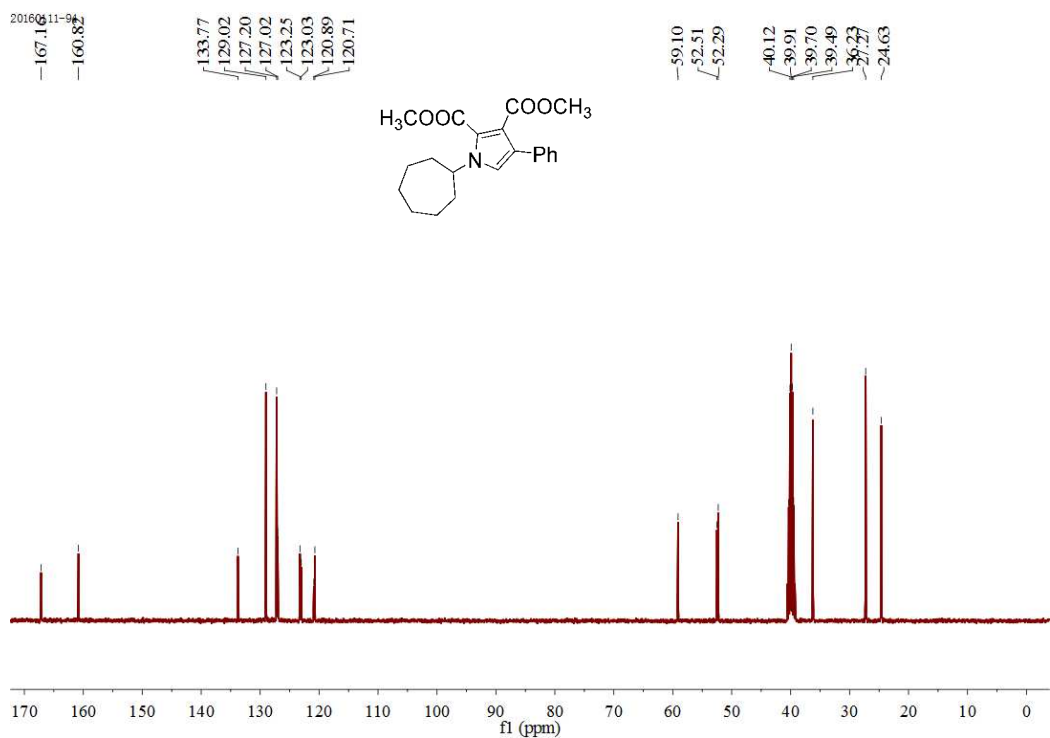

# Product 4z

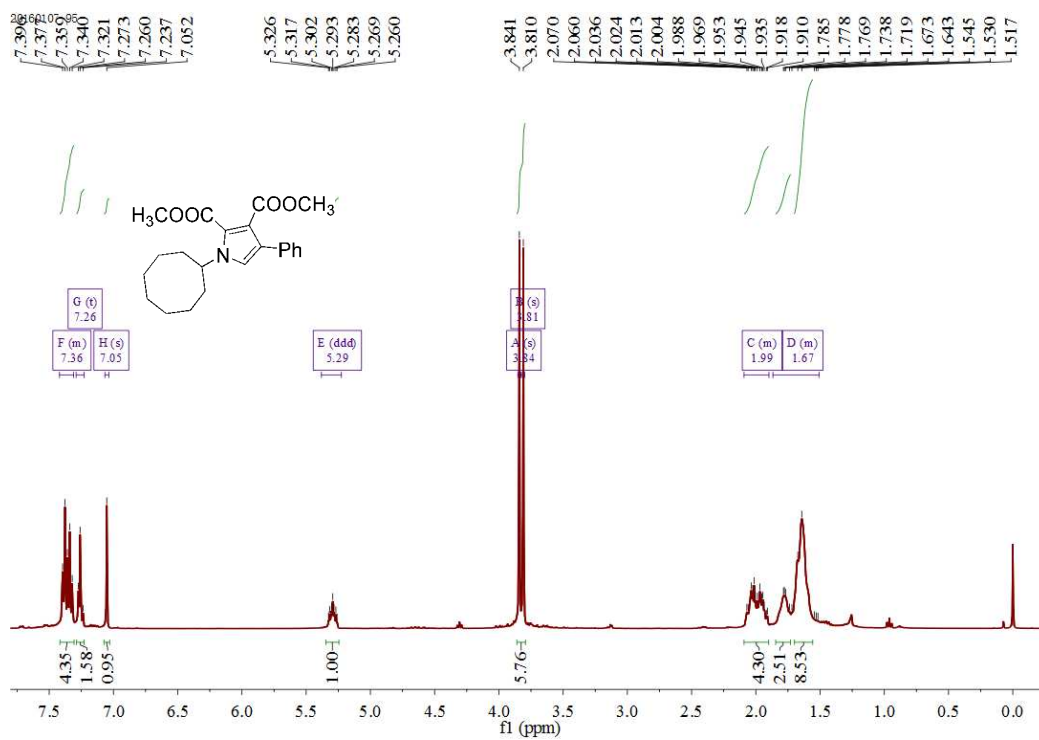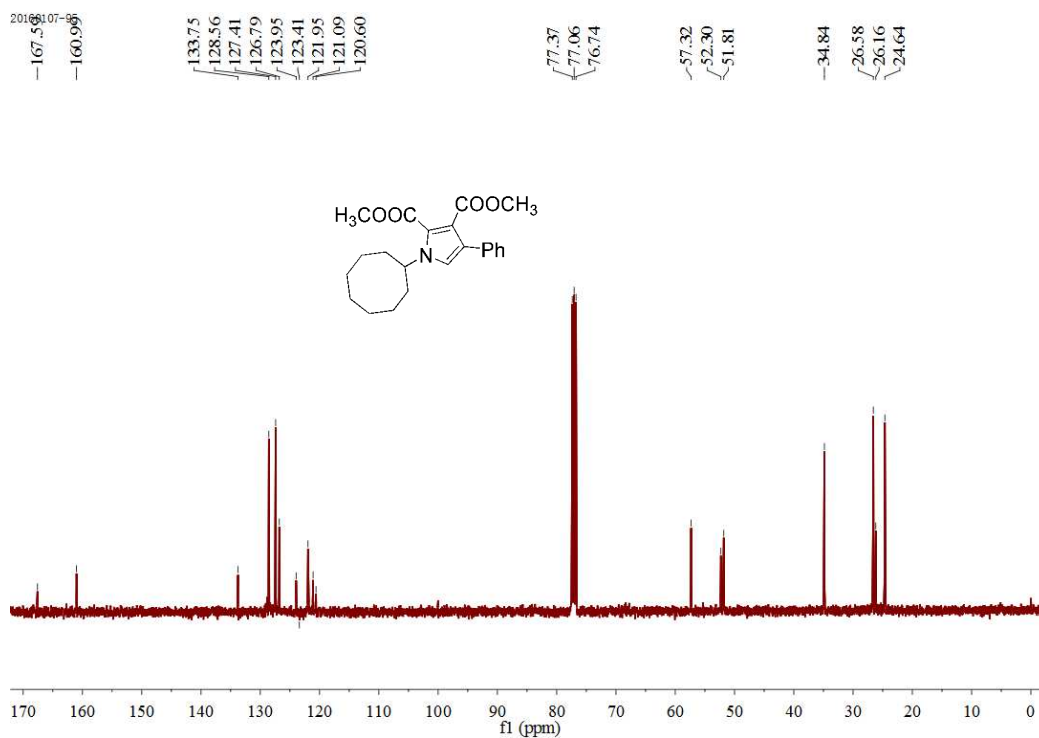

# Product 5a

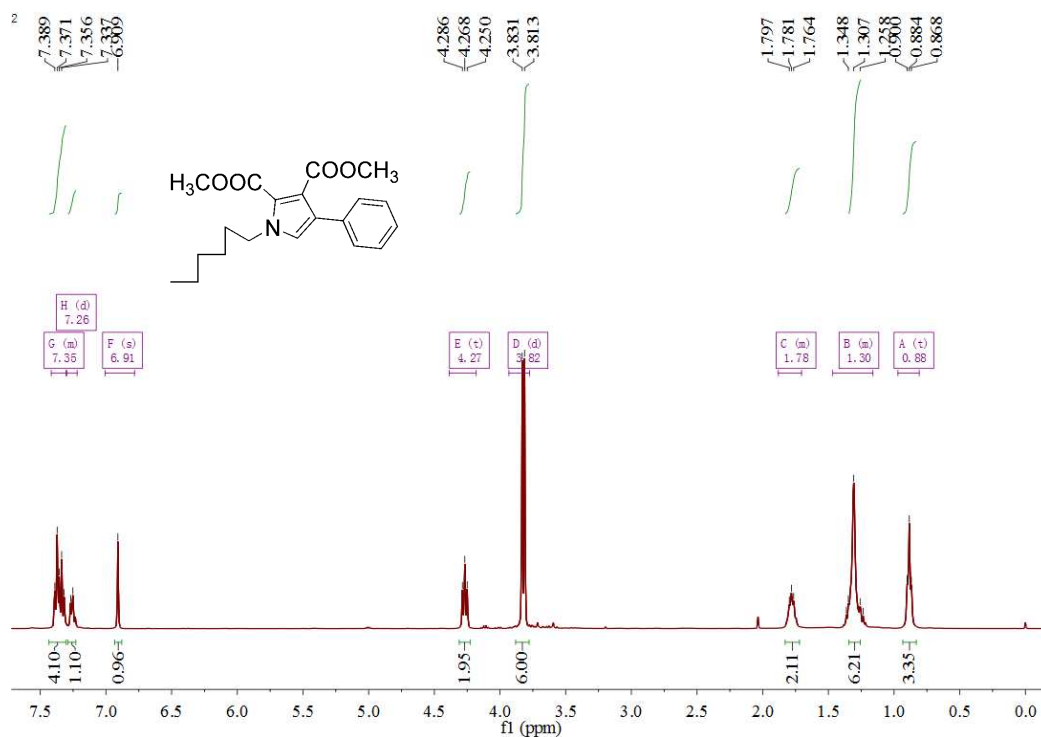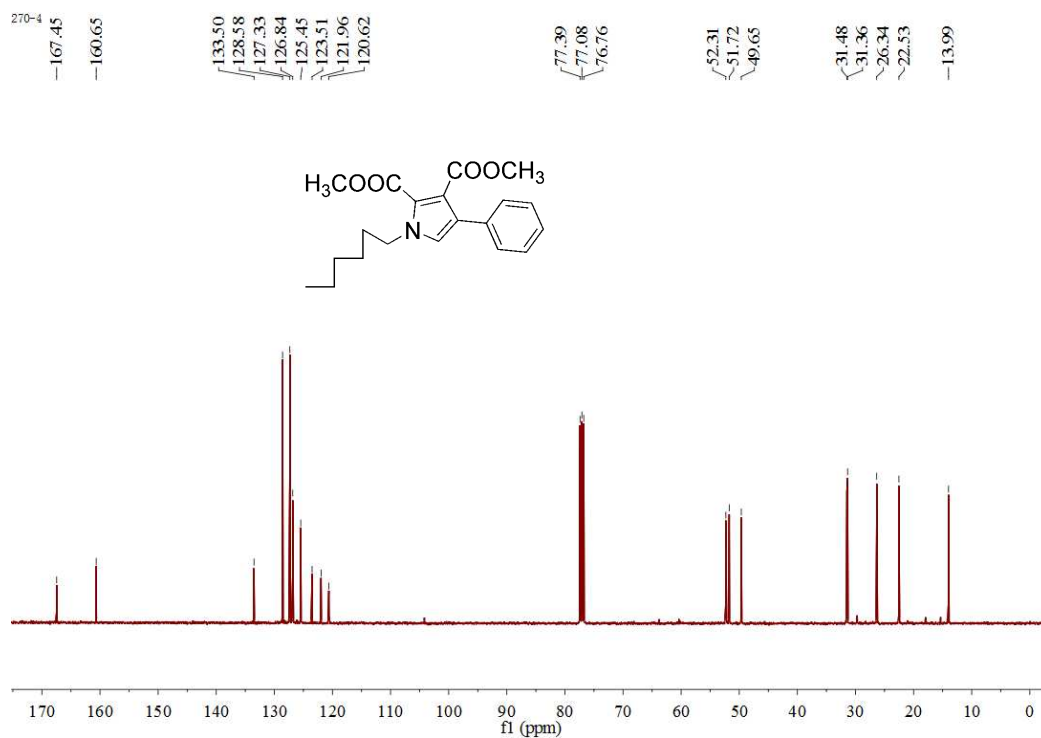

# Product 5b

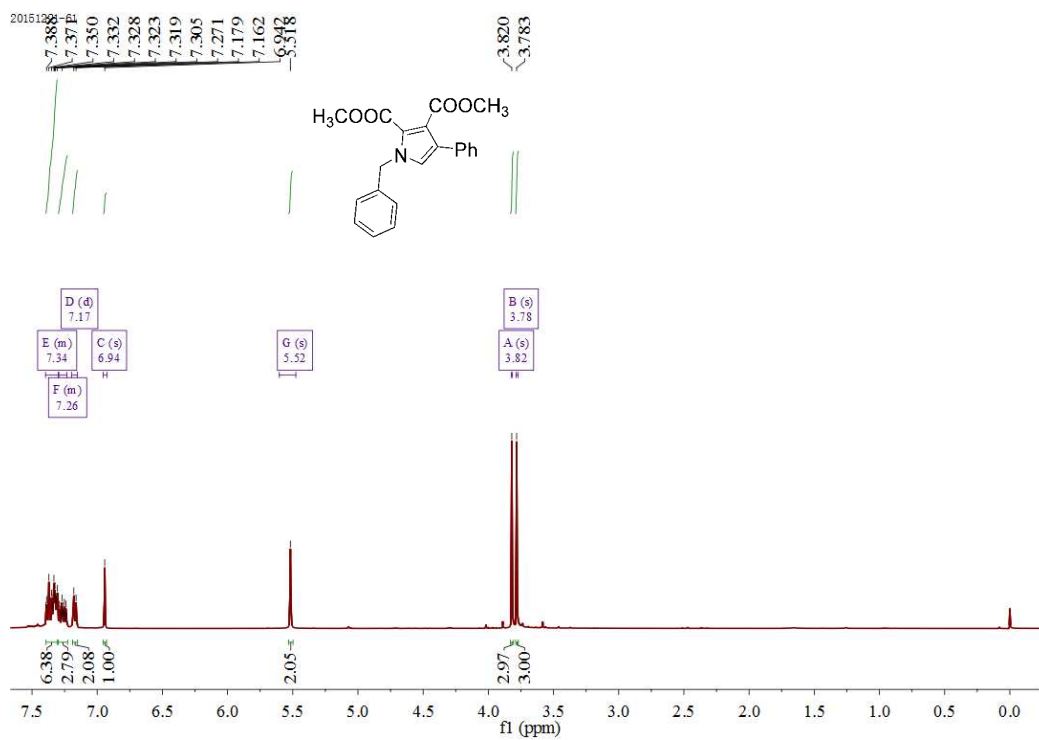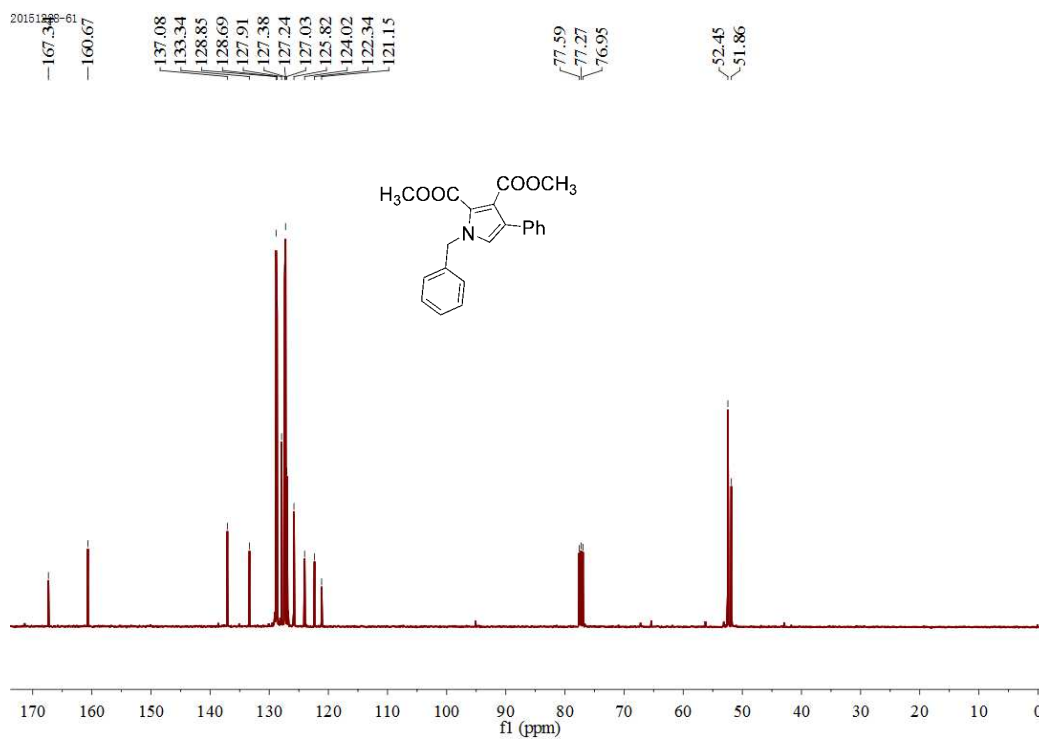

# Product 5c

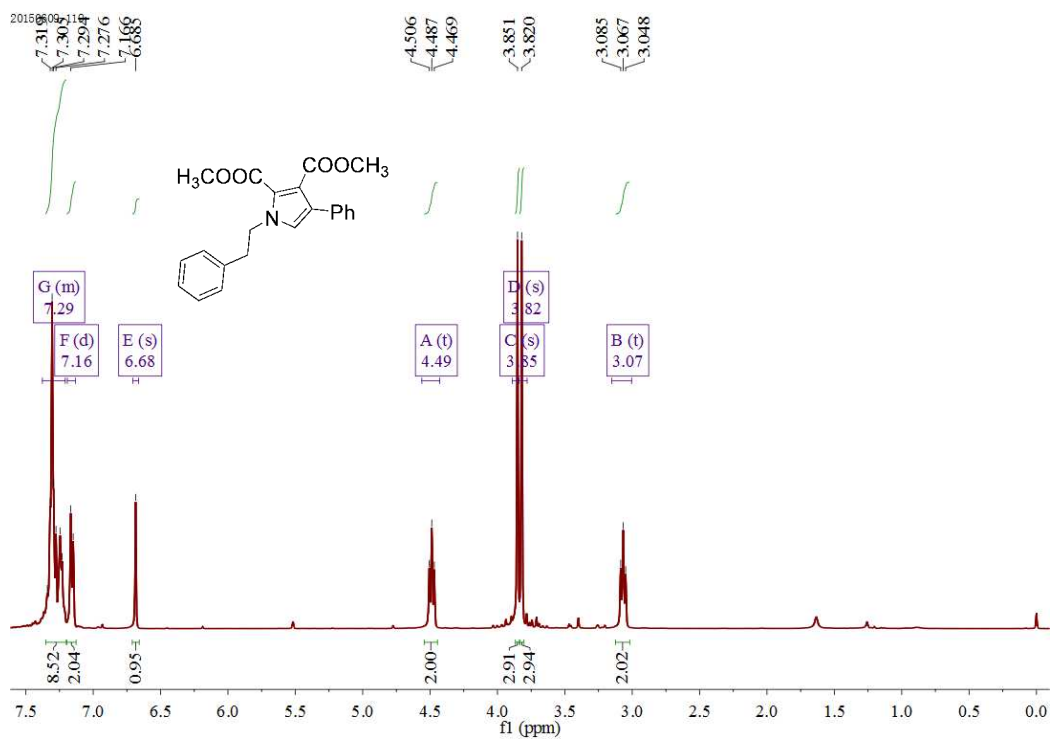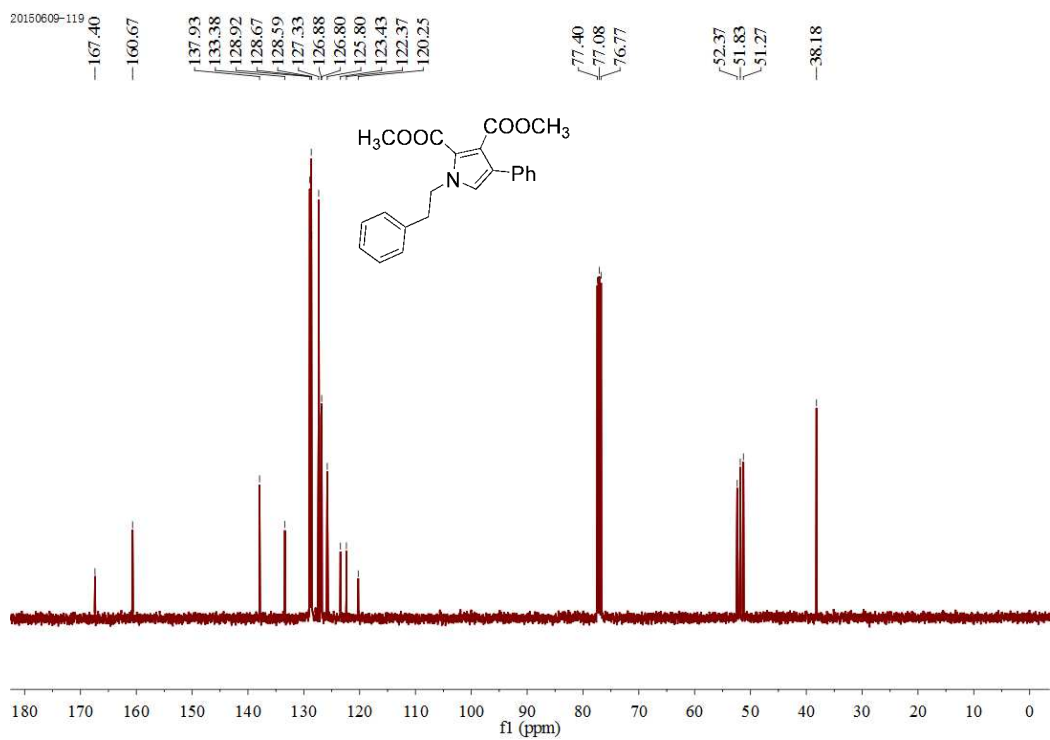

# Product 5d

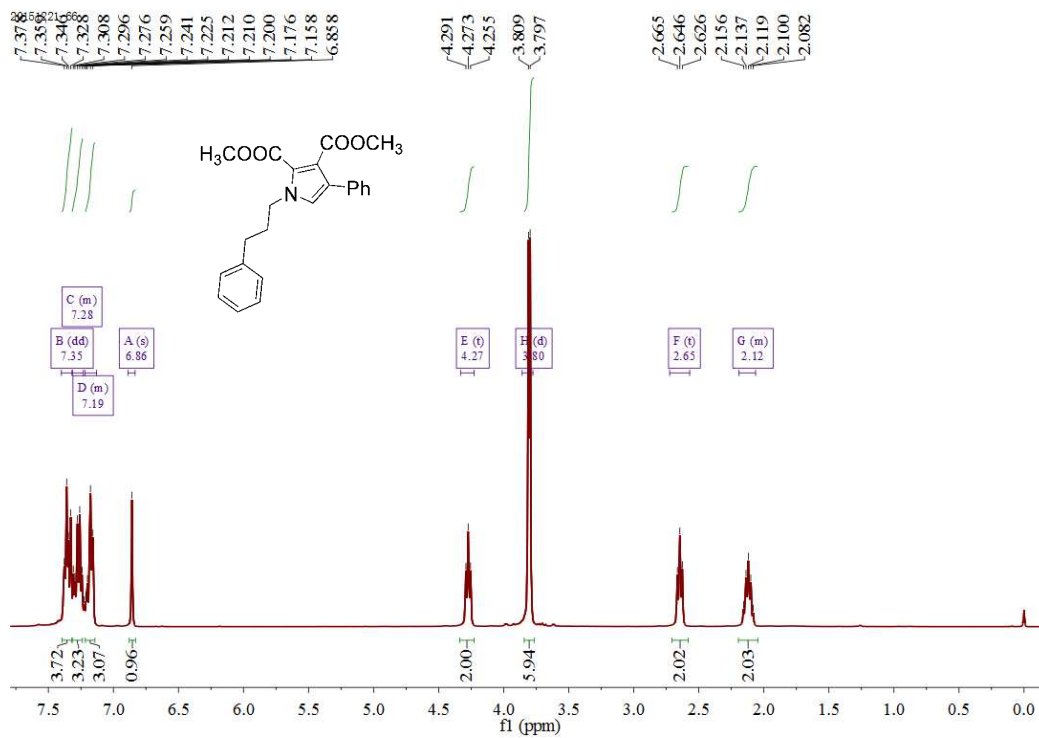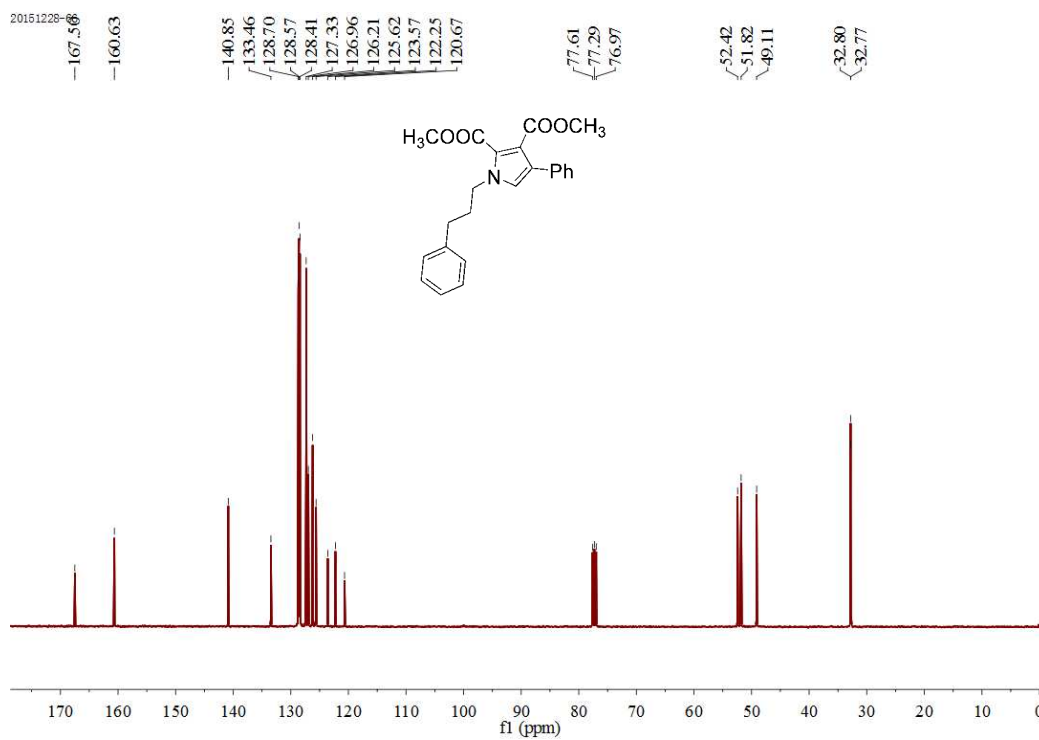

# Product 5e

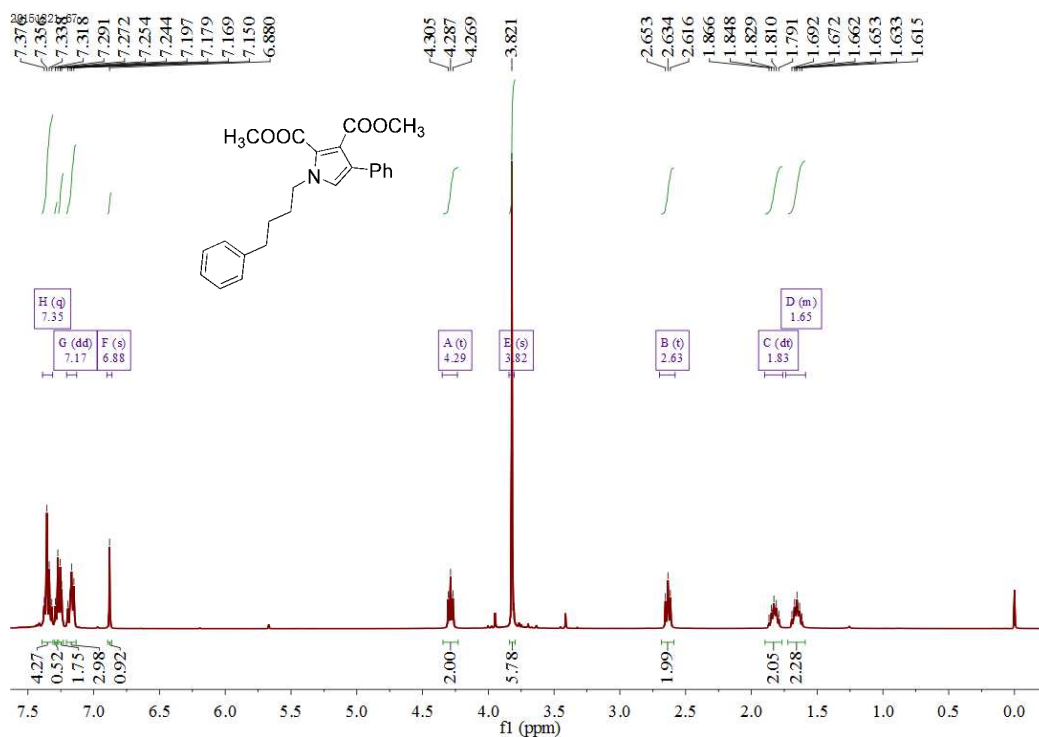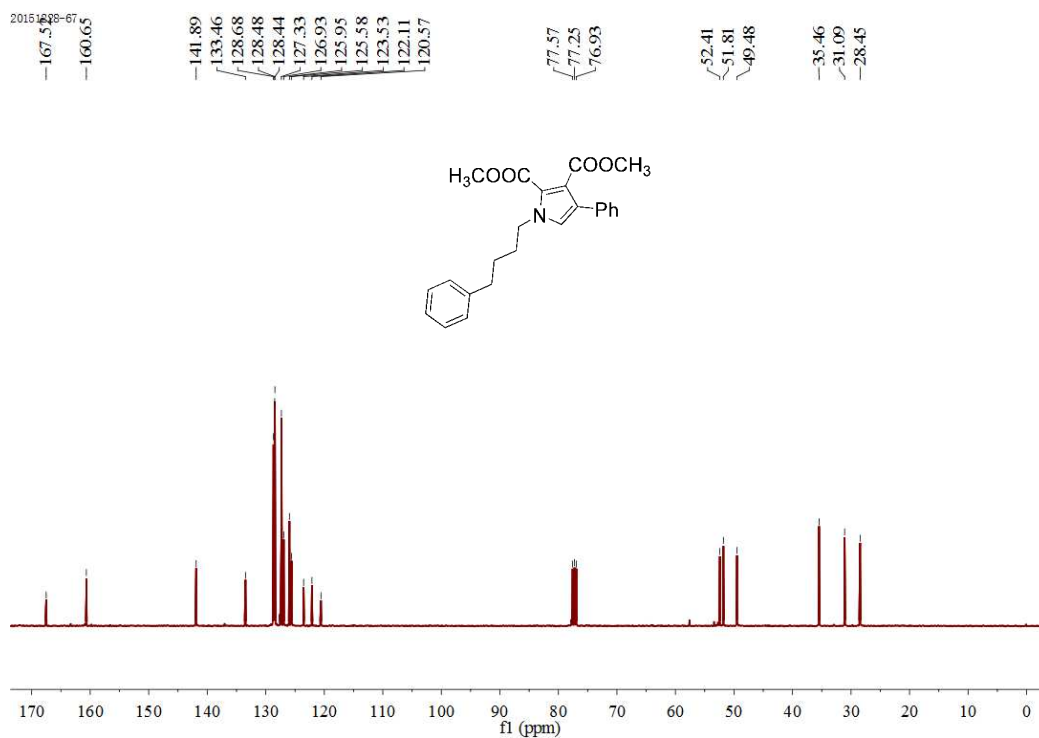

# Product 6a

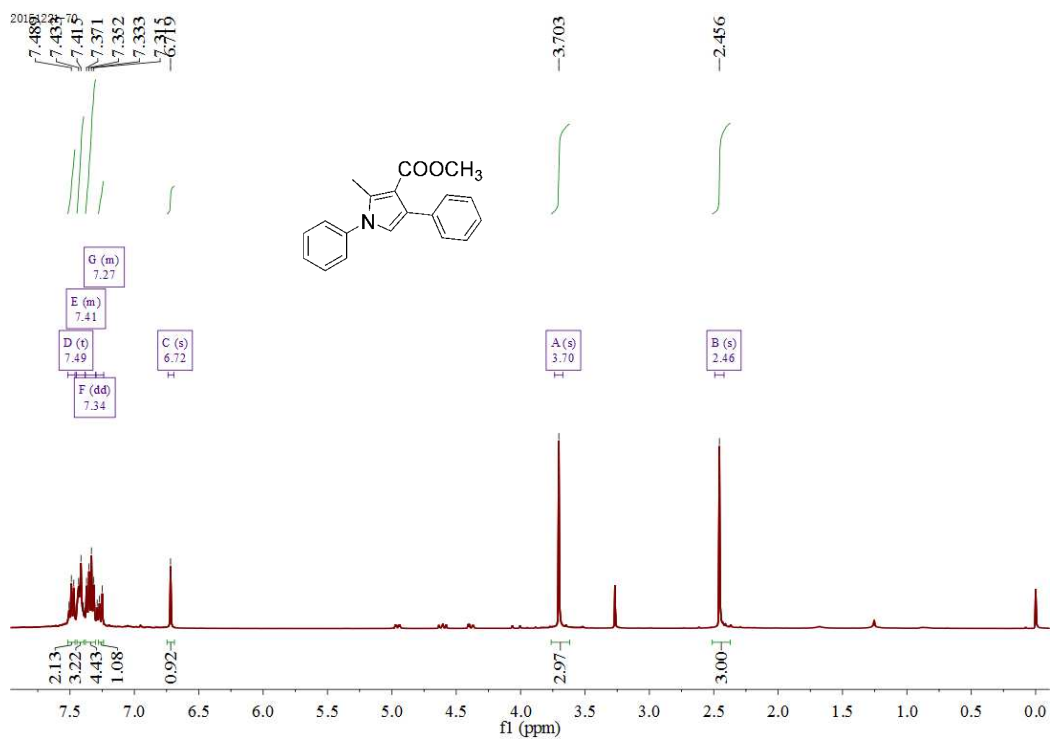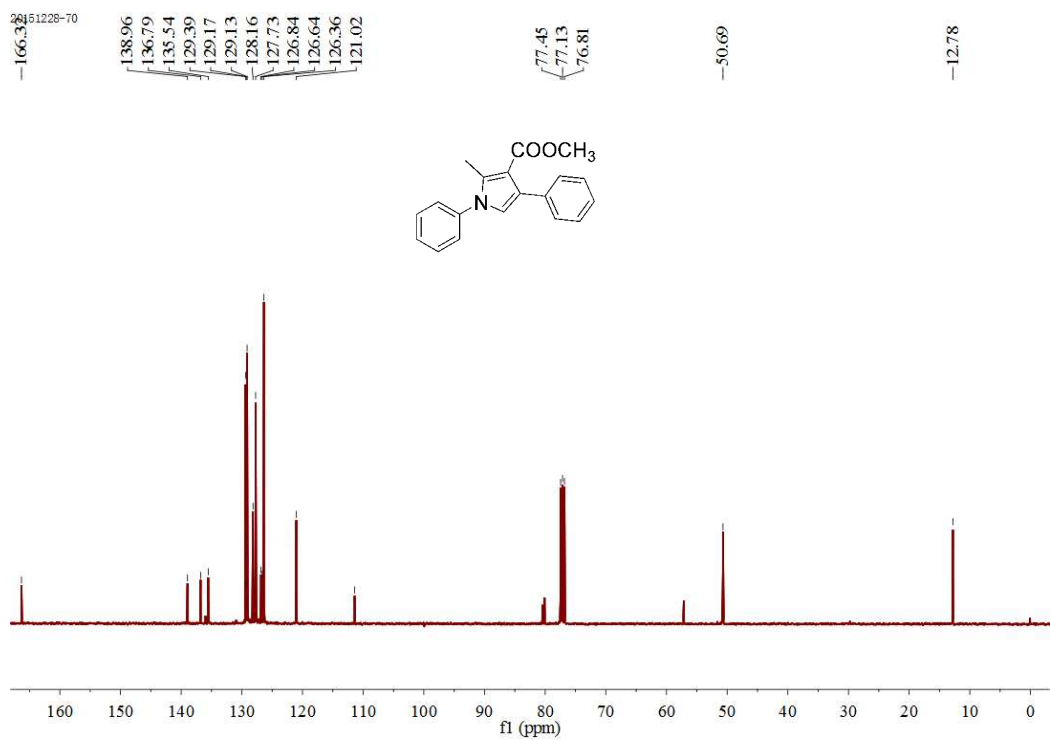



# Product 6b

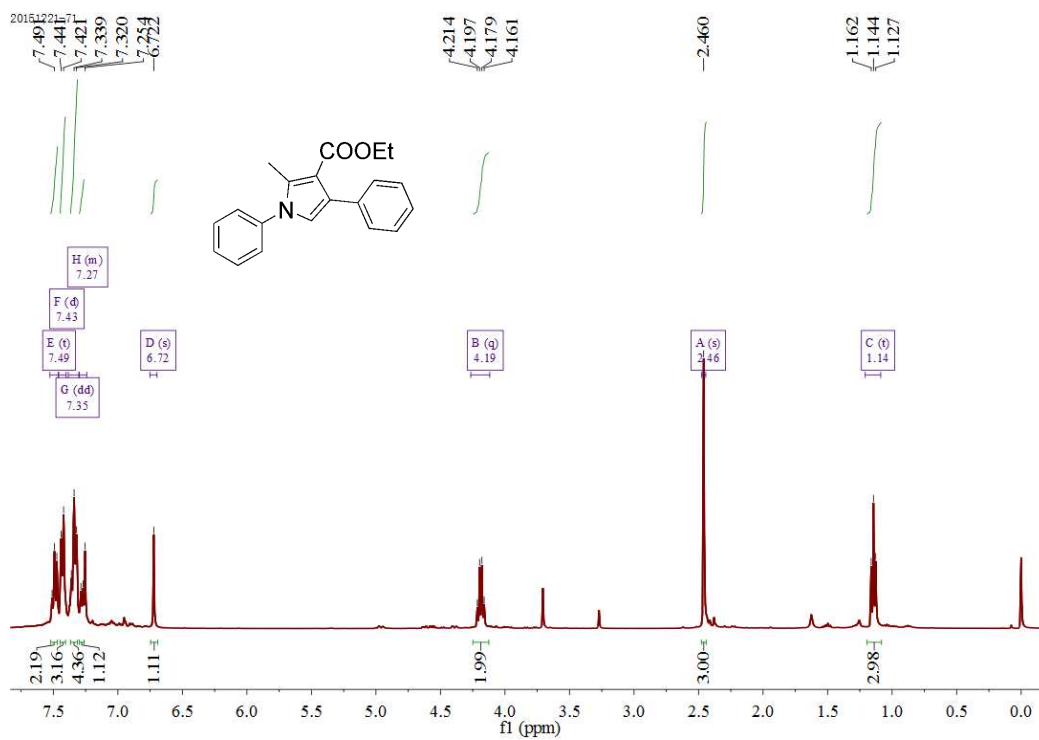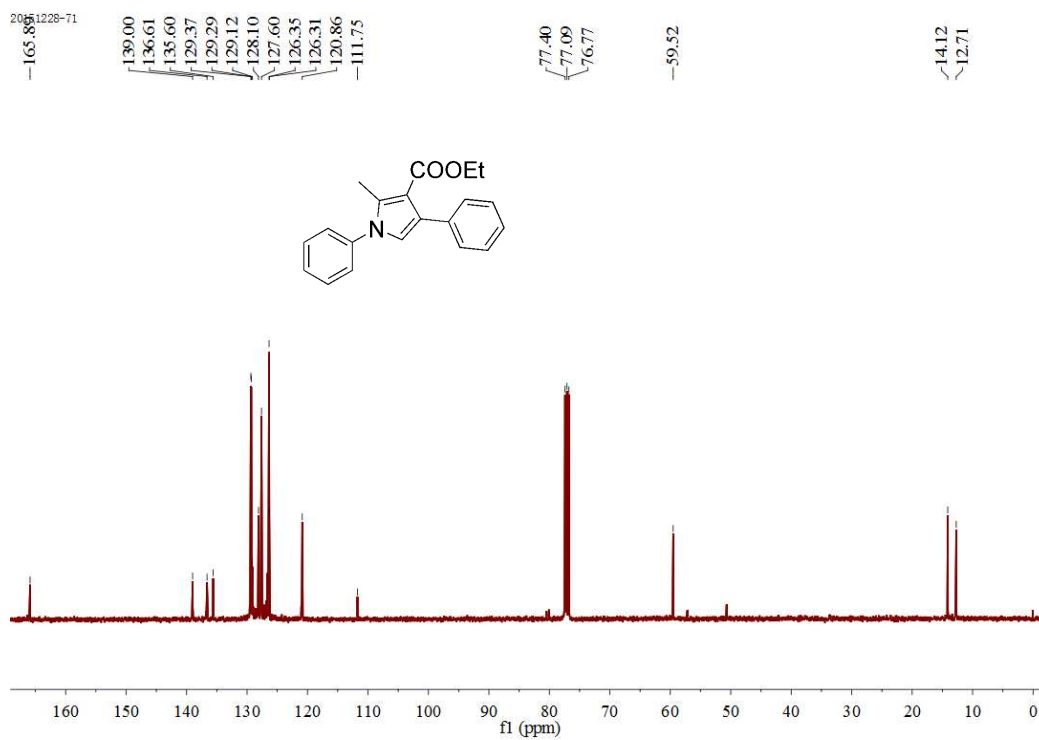

# Product 6c

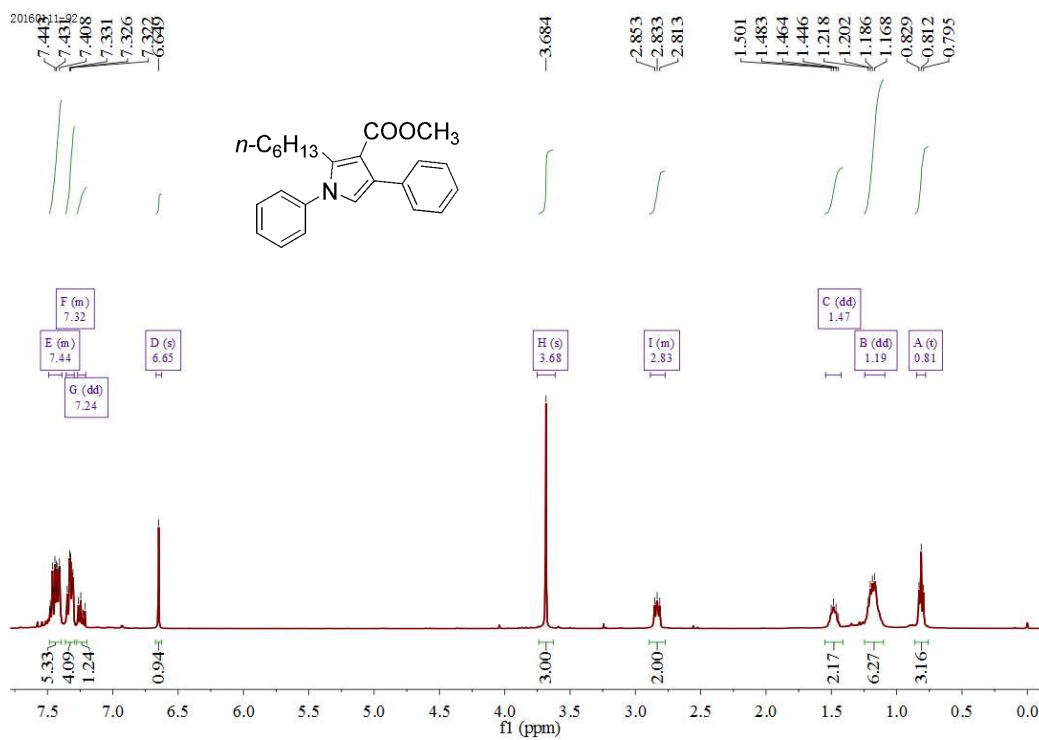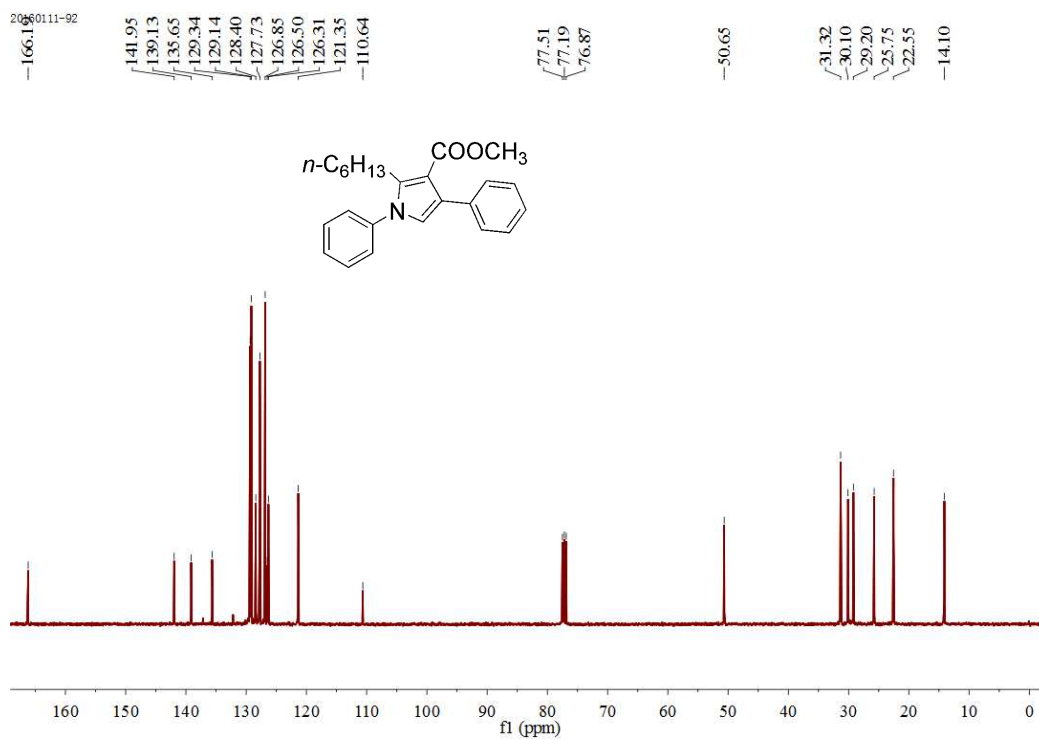

# Product 6d

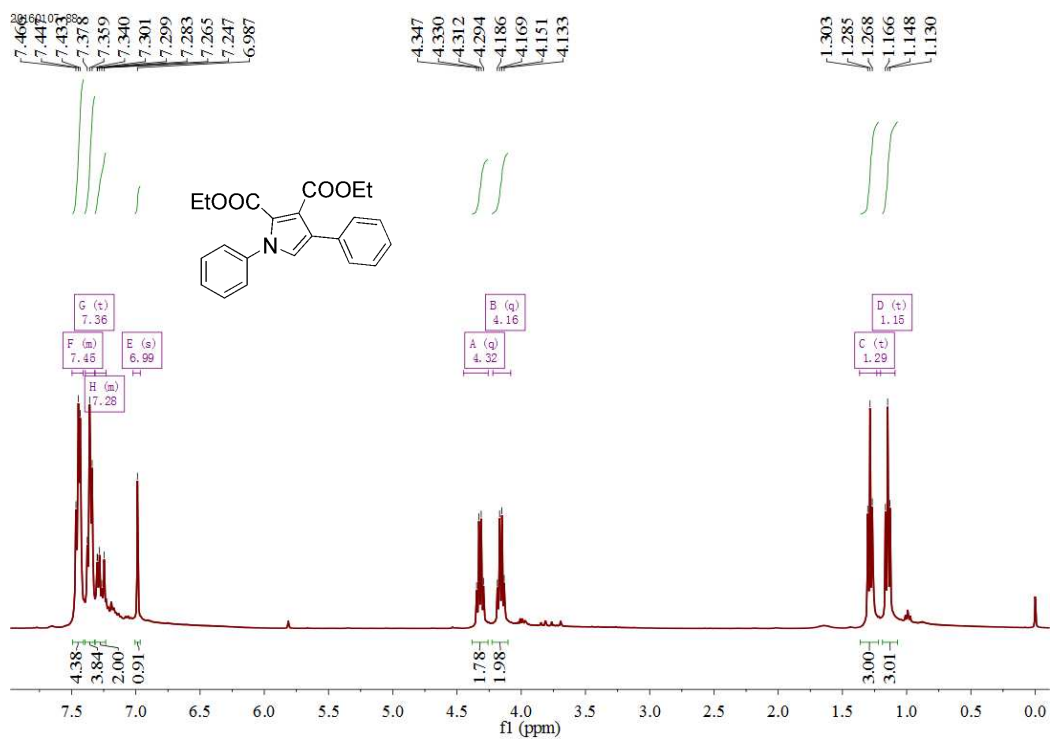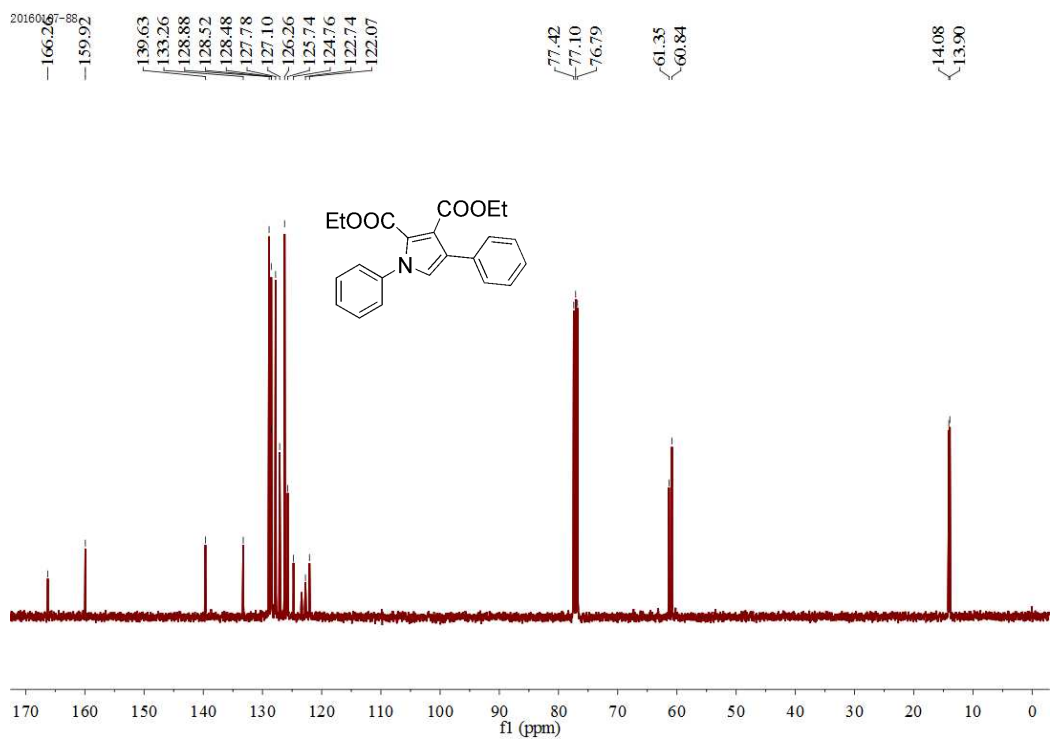

# Product 6e

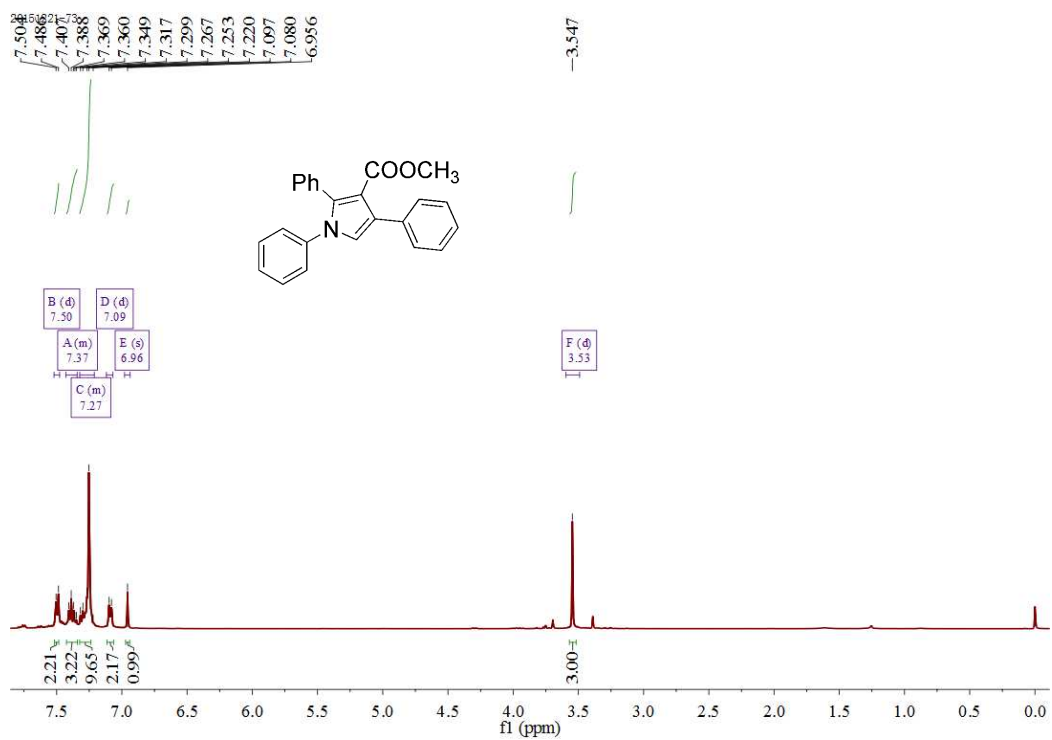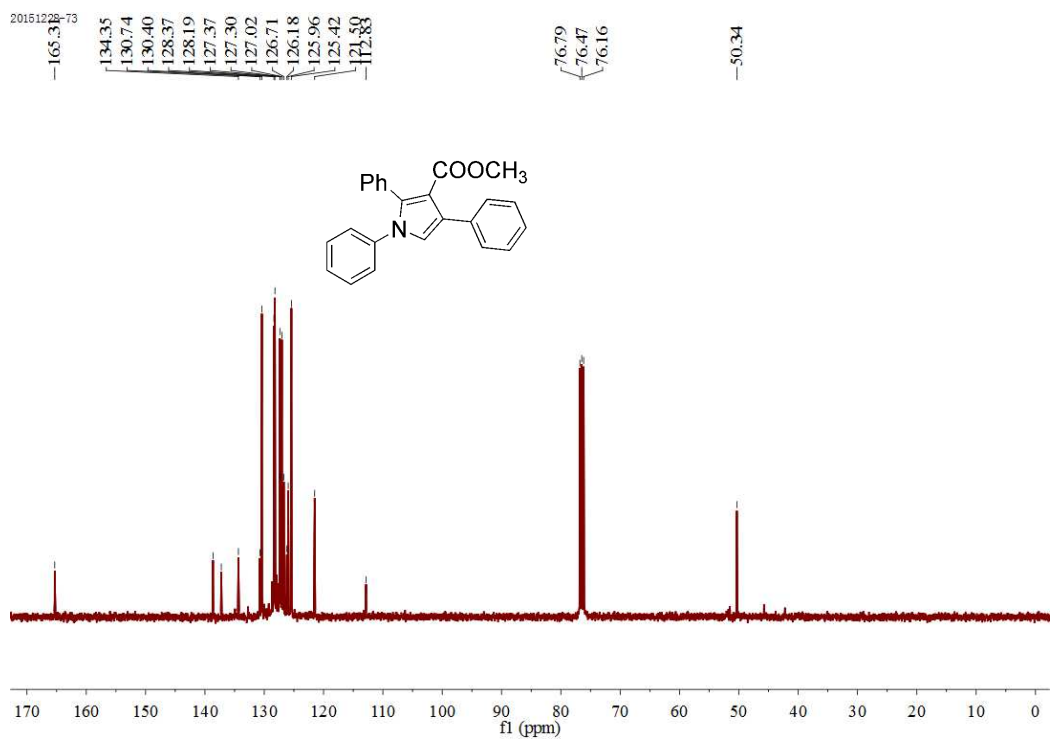

# Product 6f

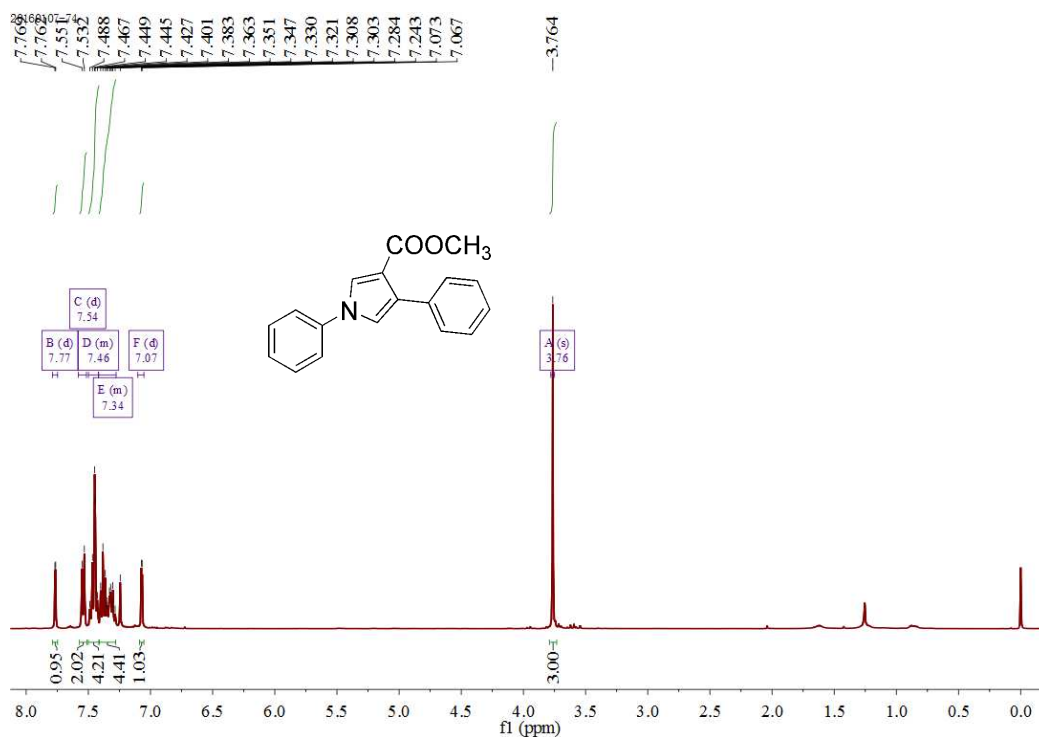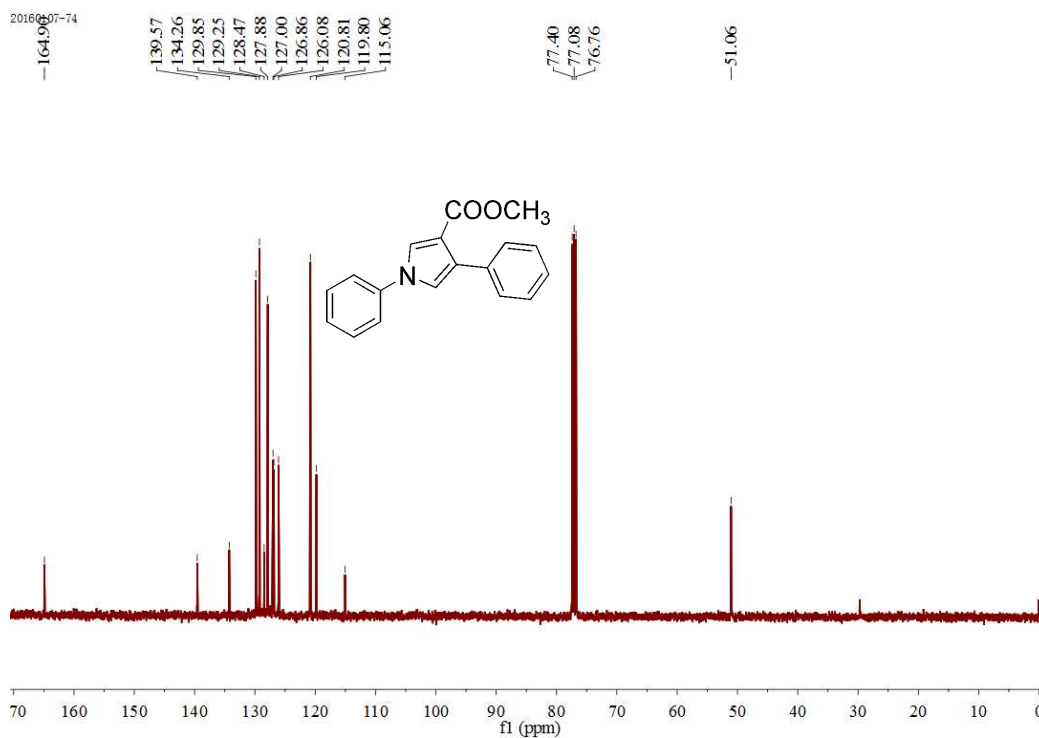

# Product 7a

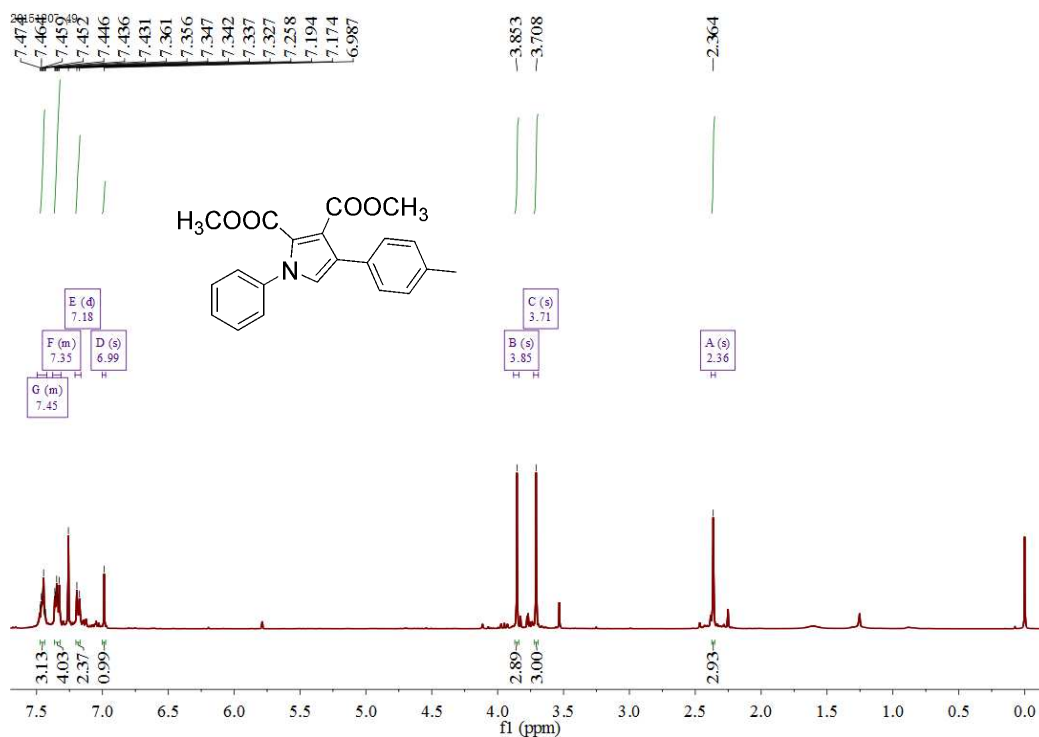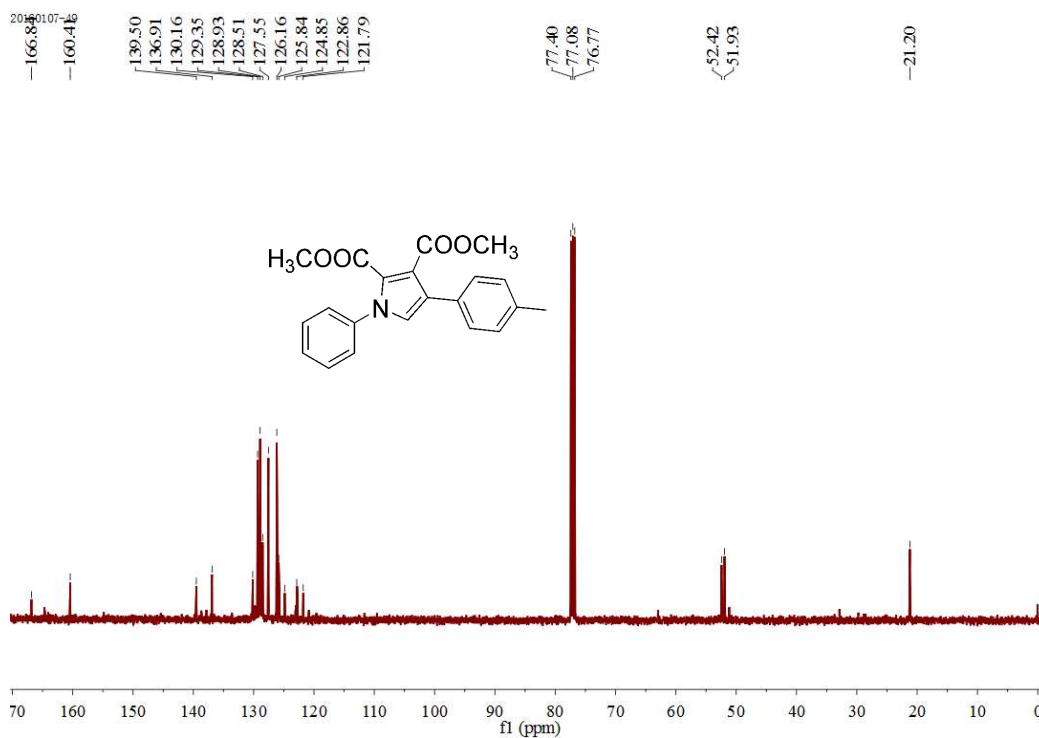

# Product 7b

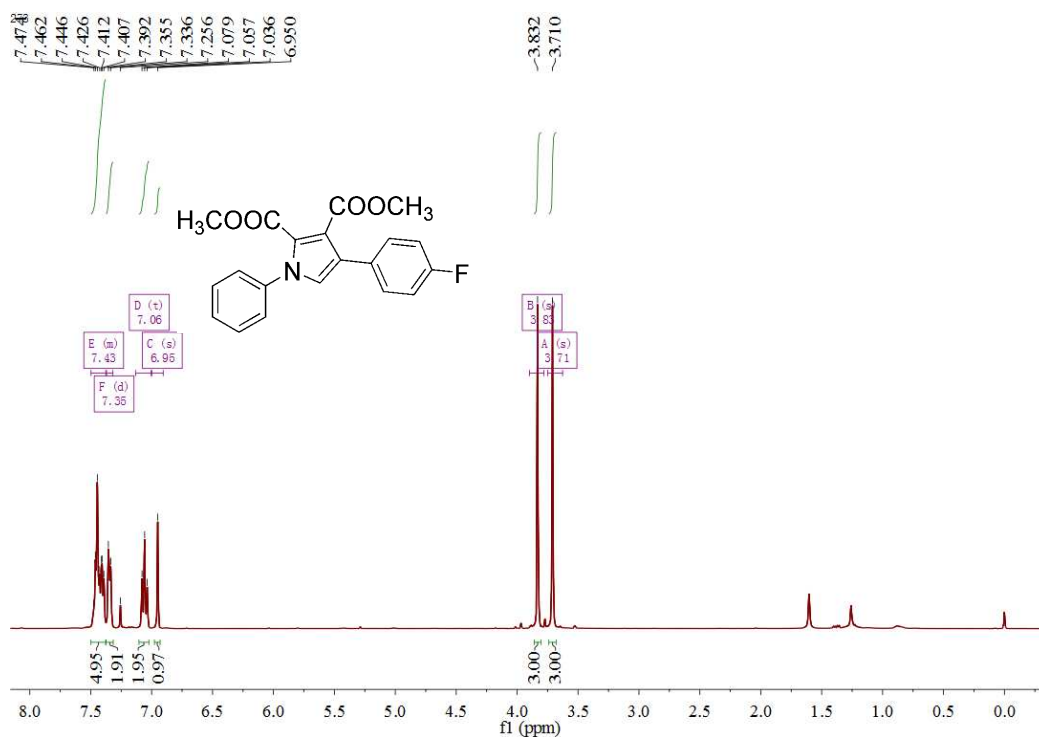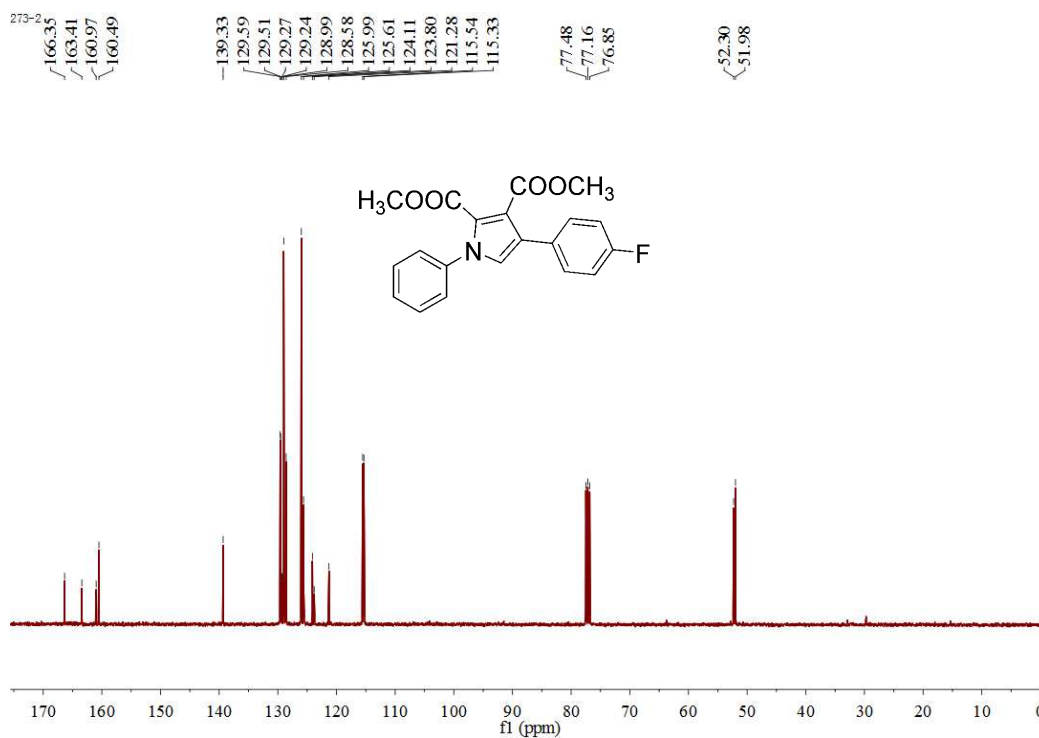

# Product 7c

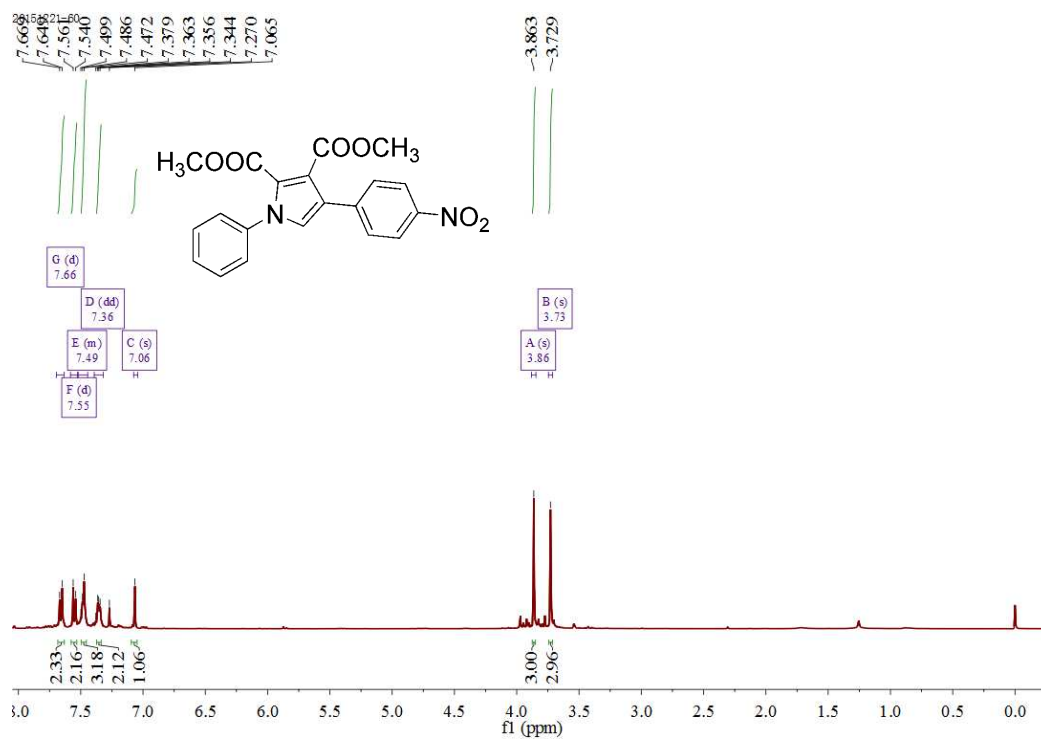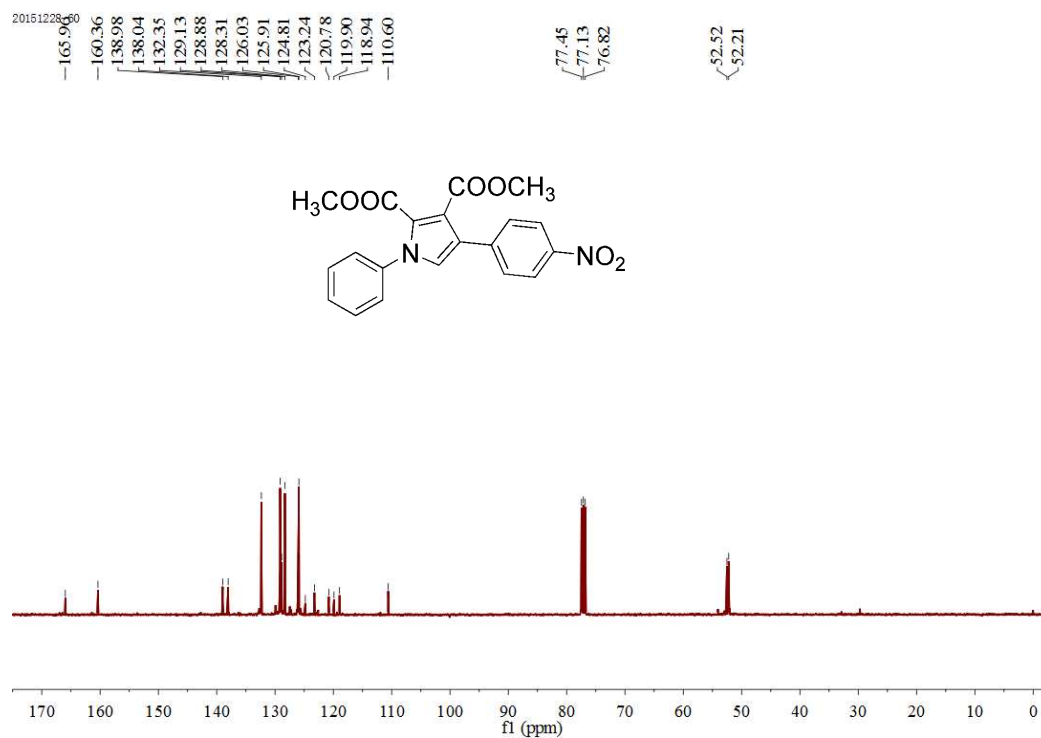



# Product 7d

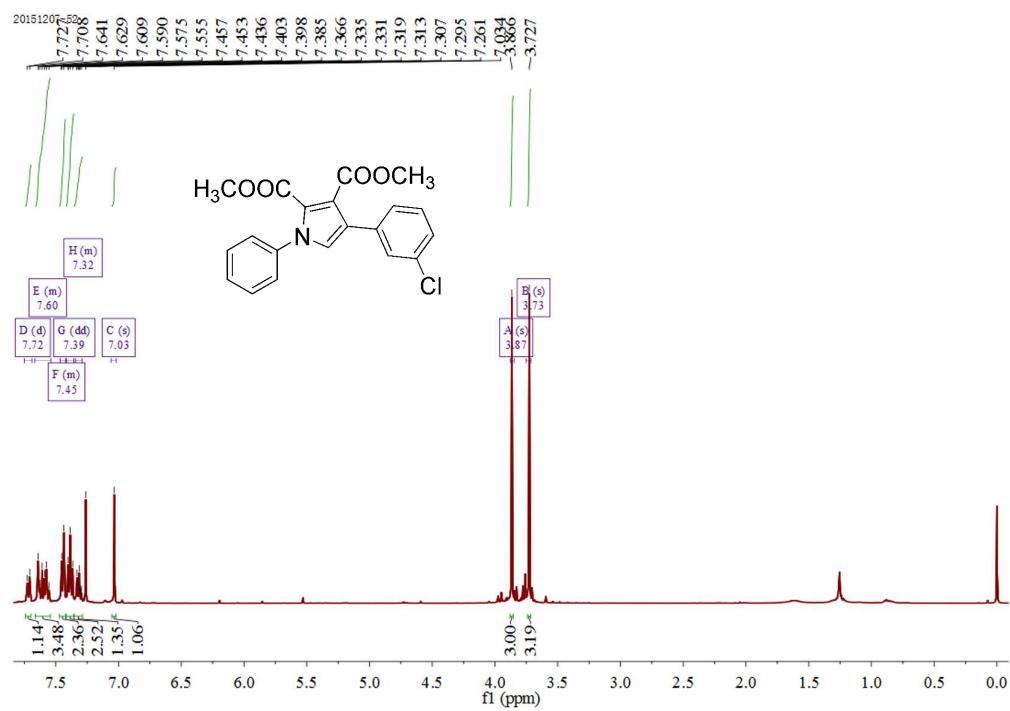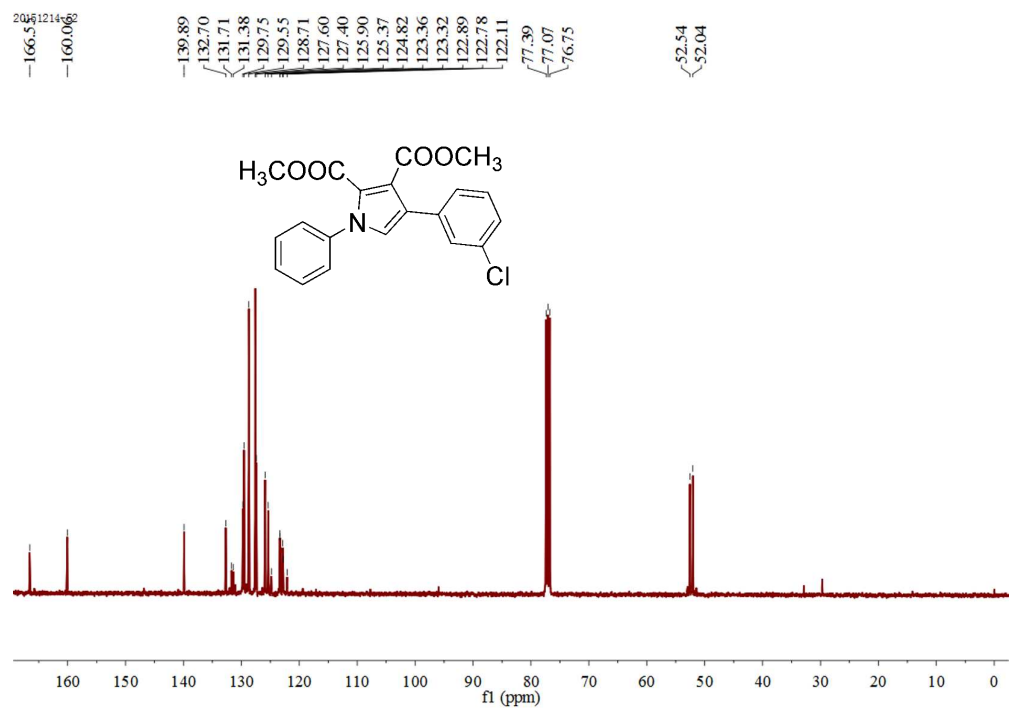

# Product 7e

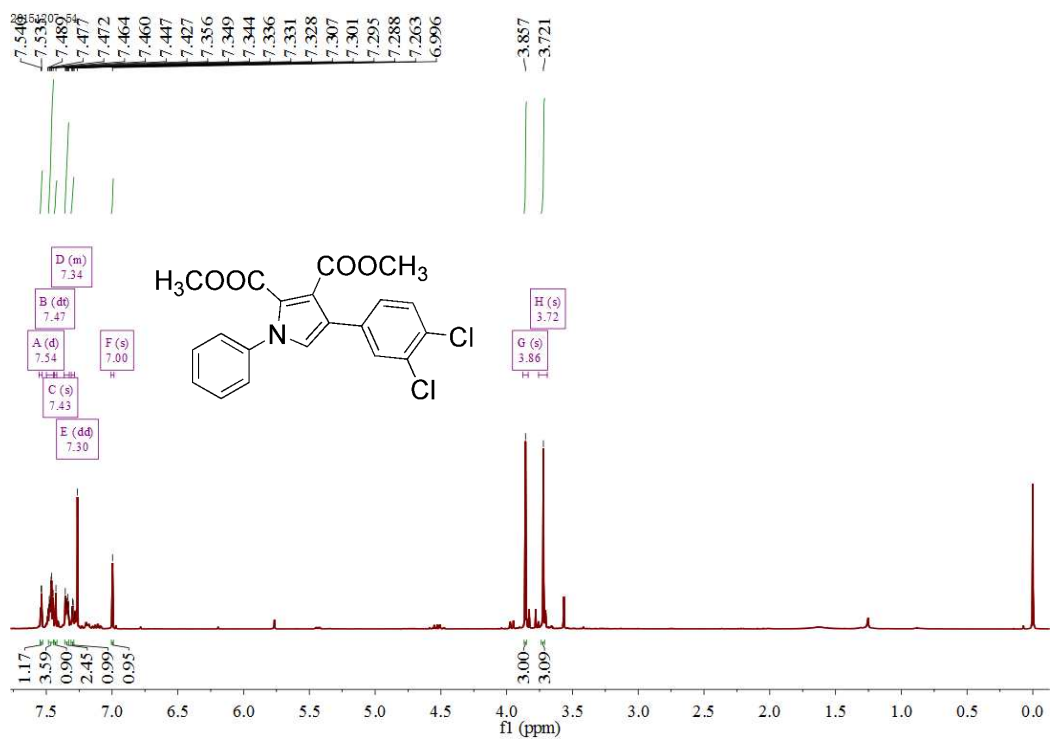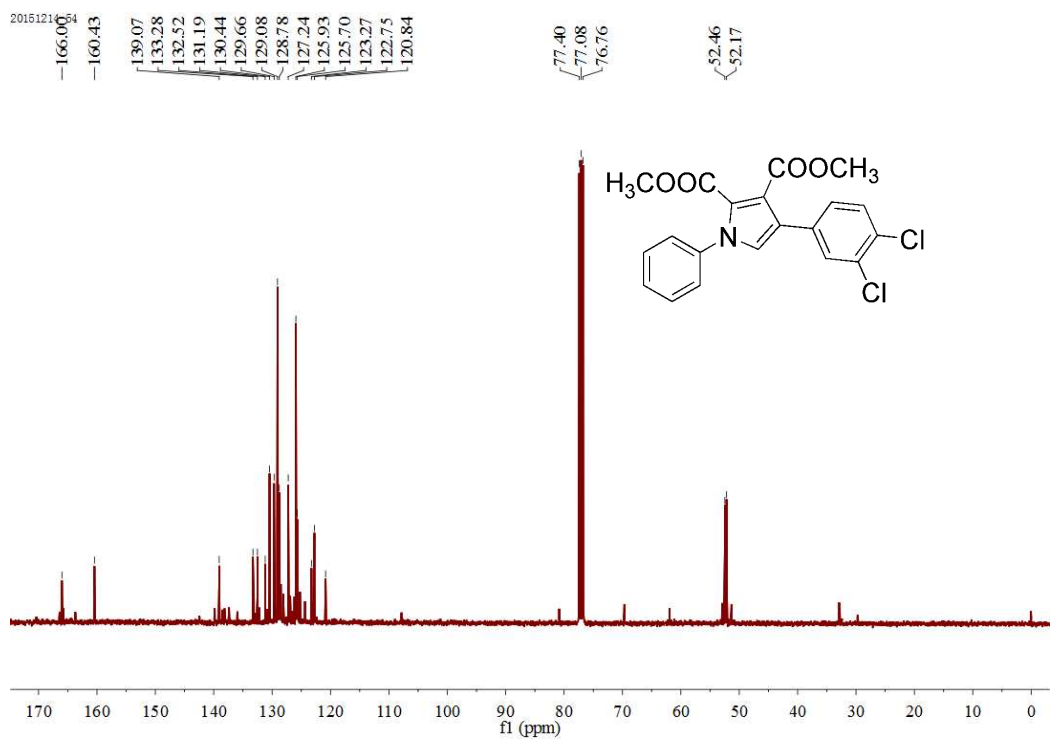

# Product 7f

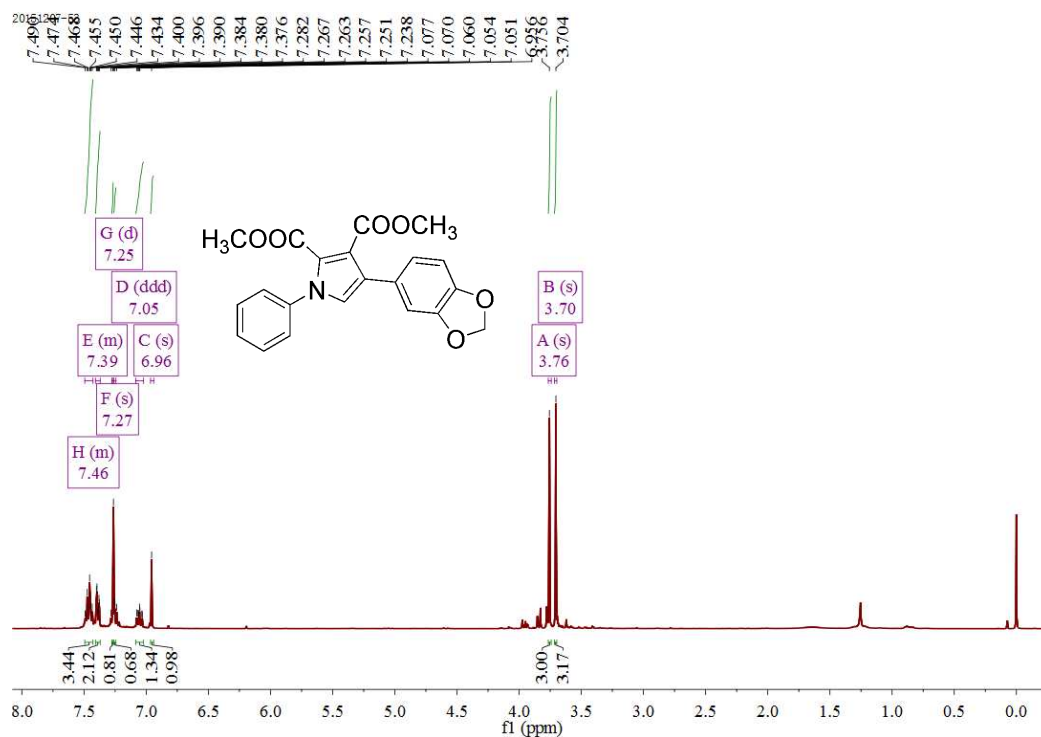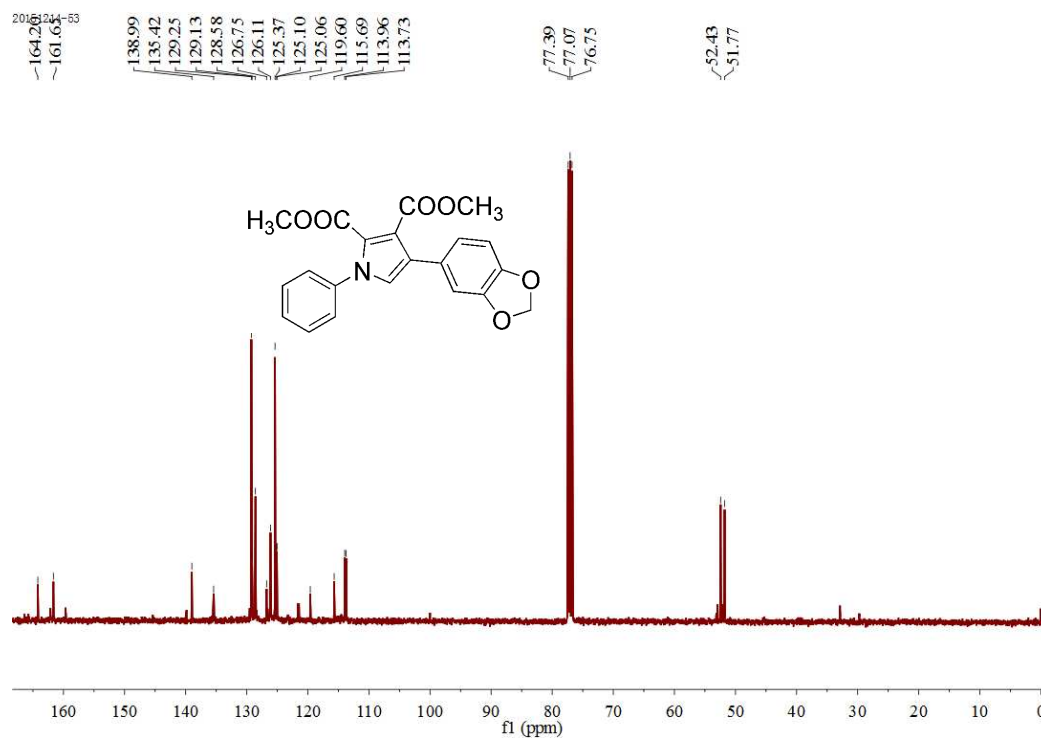

# Product 7g

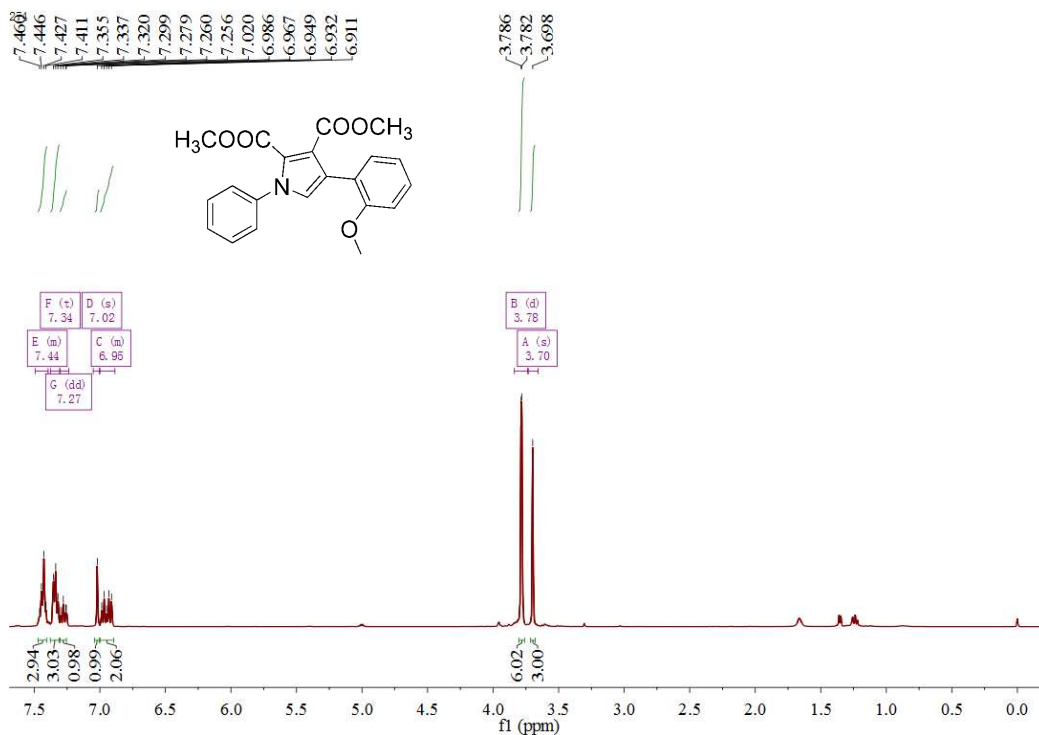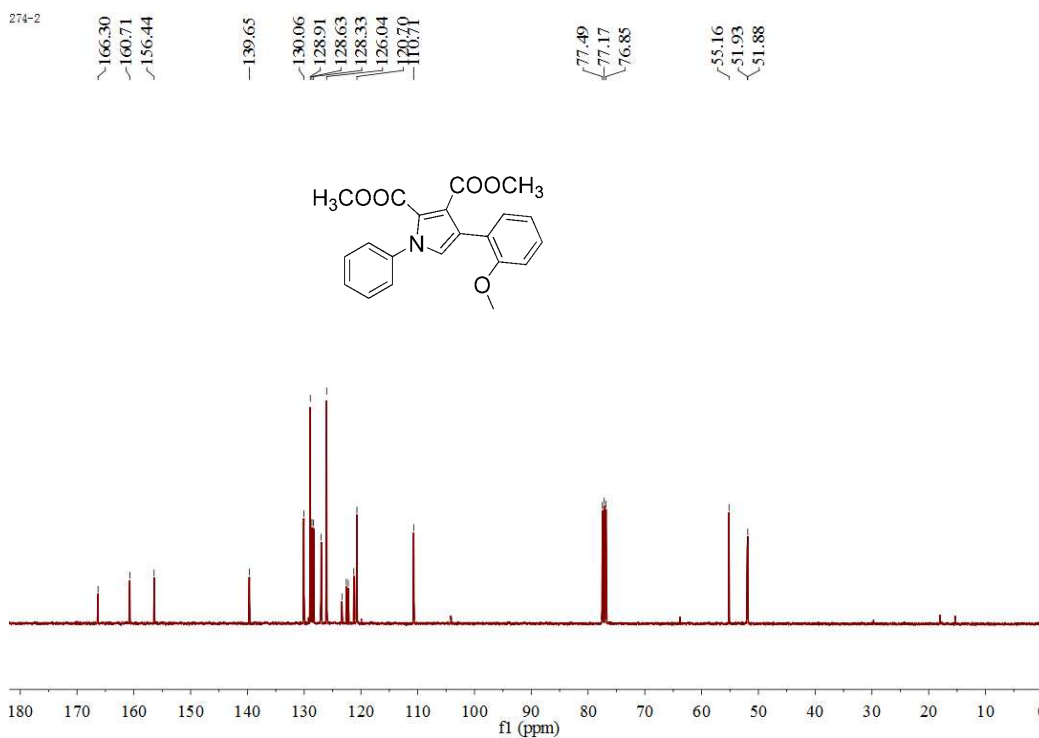

# Compound 8

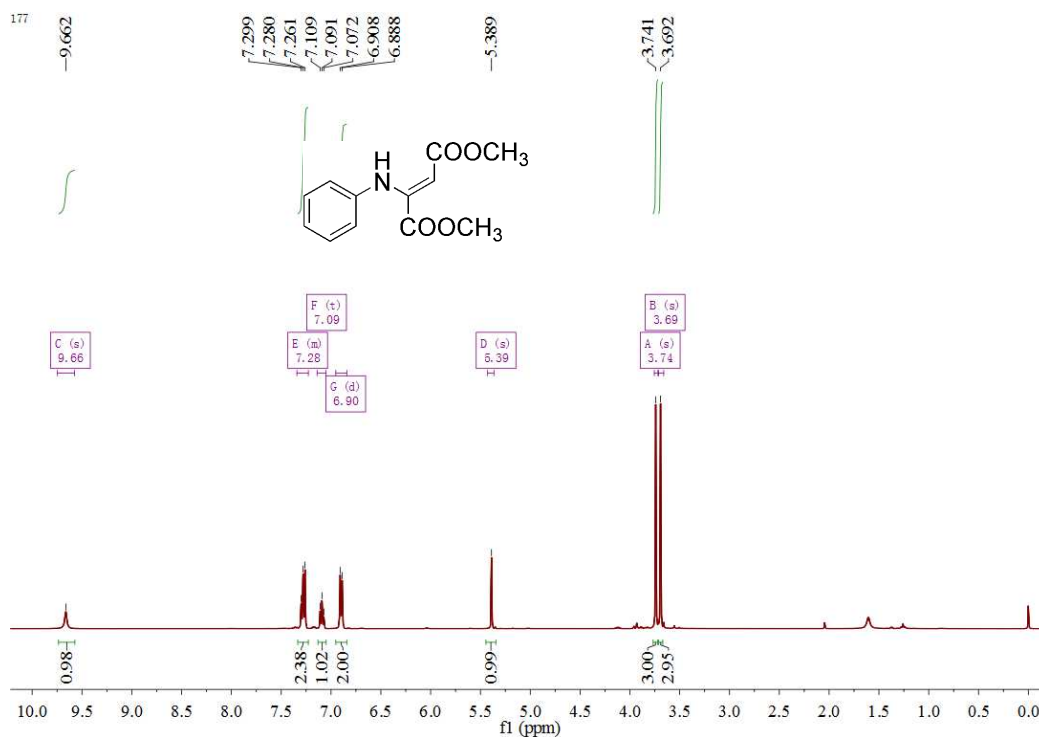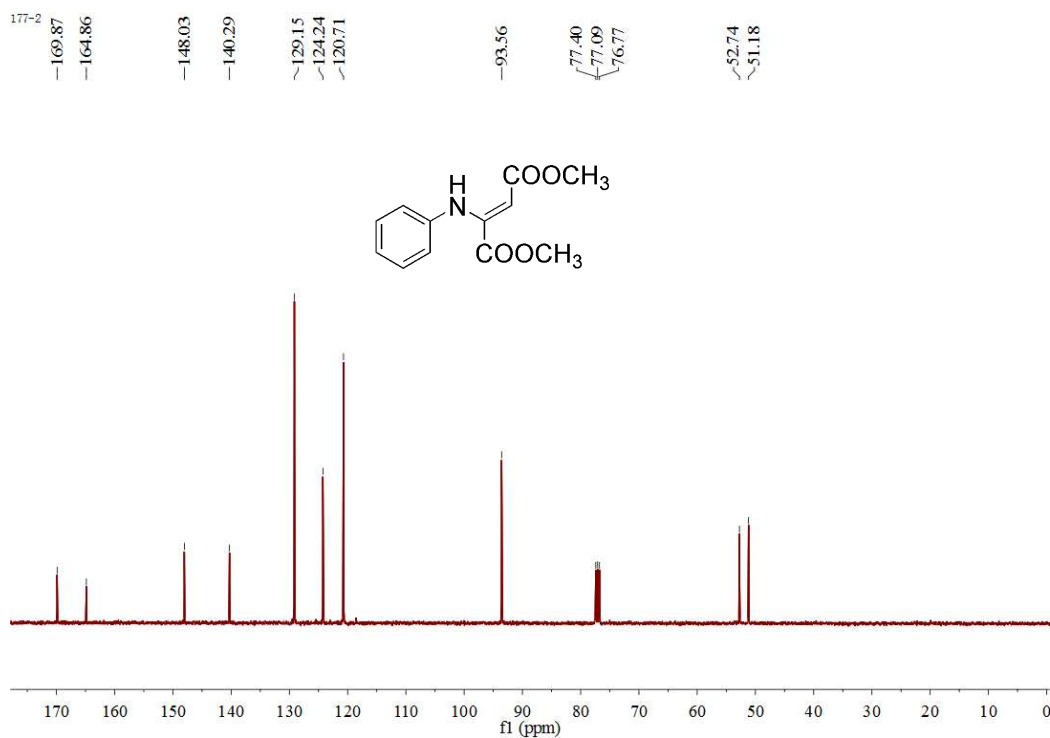

Supplement: Supplementary file 1 [file 5964966]
